# Supplementary material for: A Potential Citrate Shunt in Erythrocytes of PKAN Patients Caused by Mutations in Pantothenate Kinase 2
Source: Biomolecules. 2022 Feb 18;12(2):325. doi: 10.3390/biom12020325 (PMC8869601; doi:10.3390/biom12020325)
Supplement: Supplementary file 1 [file biomolecules-12-00325-s001.zip › Table S1 Linear range of QCs and samples.xlsx]

## Sheet: Tabelle1
Normalised peak areas of Quality control mixes (QC Mixes) in all batches									Normalised peak areas of samples (green cells, if in linear range of QC)
Batch 1	QC.2	QC01	QC05	QC25	QC100	R2			Samples	Metabolites	*Pantothenic acid	*Aspartic acid	*Lactic acid	in range of QC
*Pantothenic acid	0.000815746	0.00347637	0.037021	0.250817	0.552258	0.956224			batch 1	Ery_M46_A3_M1_SL	0.00562738	2.00515	11.7982			amount of substance in QC Mix "normal" [pmol]
*Aspartic acid	0.038794	0.110069	0.793073	2.60262	4.22685	0.870951				Ery_C43M_B7_M1_SL	0	3.52113	4.93098				QC.2	QC01	QC05	QC25	QC100
	QC high .2	QC high 01	QC high 05	QC high 10												amount [pmol]	0.2	1	5	25	100
*Lactic acid	0.352853	1.41776	7.90548	10.8622		0.947169			Batch 2	Ery_M26_A1_M2_SL	0.0662522	1.8058	24.3861
																amount of substance in QC Mix "high" [pmol]
Batch 2	QC.2	QC01	QC05	QC25	QC100				Batch 9	Ery_T26_C7_M9_SL	0	2.88729	8.07135				QC high .2	QC high 01	QC high 05	QC high 10
*Pantothenic acid	0.000202427	0.00329501	0.0349685	0.245542	0.541186	0.95618										amount [pmol]	60	300	1500	3000
*Aspartic acid	0.0143748	0.0851934	0.759635	2.41503	4.51591	0.917046			Batch 12	Ery_T43_C3_M12_SL	0	2.44913	3.45544
	QC high .2	QC high 01	QC high 05	QC high 10						Ery_M1_B4_M12_SL	0.00514249	0.425226	9.63436			PGP normalized area values of Aspartic acid, Pantothenic acid, Lactic acid
*Lactic acid	0.64274	3.83009	16.185	29.7984		0.997829				Ery_M46_B1_M12_SL	0.00544207	1.47317	6.06067
										Ery_C26M_A1_M12_SL	0	2.04702	4.35106
Batch 9	QC.2	QC01	QC05	QC25	QC100					Ery_M2_B4_M12_SL	0.00202245	0.344312	8.03494
*Pantothenic acid	0.000142571	0.00245594	0.0287235	0.246798	0.498419	0.936996				Ery_C46F_A1_M12_SL	0	3.12469	2.88481
*Aspartic acid	0.0146569	0.0900071	0.551756	2.4144	4.50314	0.919659
	QC high .2	QC high 01	QC high 05	QC high 10					Batch 14	Ery_T46_C6_M14_SL	0	3.27579	4.9208
*Lactic acid	0.522896	2.48905	10.8766	22.5336		0.999401				Ery_M2_C7_M14_SL	0.0029073	0.49612	12.5282
										Ery_C43M_C7_M14_SL	0.000413986	2.83689	3.07219
Batch 12	QC.2	QC01	QC05	QC25	QC100					Ery_C26F_C4_M14_SL	0	2.89519	2.6022
*Pantothenic acid	0.00011096	0.0022244	0.0314571	0.209255	0.505614	0.971042				Ery_C26F_A4_M14_SL	0	3.32137	1.80089
*Aspartic acid	0.00924923	0.081556	0.772903	2.39091	4.89243	0.939853				Ery_C43M_A3_M14_SL	0.000385922	2.72187	4.59447
	QC high .2	QC high 01	QC high 05	QC high 10						Ery_C26F_B3_M14_SL	0	2.90227	2.17026
*Lactic acid	0.328353	1.98672	8.87857	14.6149		0.987628				Ery_T43_B2_M14_SL	0	2.49403	3.03576
										Ery_M1_C1_M14_SL	0.00473021	0.378358	8.67877
Batch 14	QC.2	QC01	QC05	QC25	QC100					Ery_C46M_C3_M14_SL	0	1.68765	3.46175
*Pantothenic acid	6.75607e-05	0.0022772	0.0299999	0.1775	0.498037	0.987526				Ery_M47_A2_M14_SL	0.0222215	3.63532	2.09155
*Aspartic acid	0.012103	0.0751267	0.776703	2.61272	4.29425	0.873719				Ery_C46F_C7_M14_SL	0	3.22862	2.95548
	QC high .2	QC high 01	QC high 05	QC high 10						Ery_T26_B4_M14_SL	0	3.09606	2.71241
*Lactic acid	0.246239	1.20086	8.34553	14.8028		0.994138				Ery_M47_C2_M14_SL	0.0225235	3.87109	2.37062
										Ery_C47M_A6_M14_SL	0	2.47277	4.15209
Batch 15	QC.2	QC01	QC05	QC25	QC100
*Pantothenic acid	5.11911e-05	0.00232097	0.0301464	0.170769	0.456173	0.983259			Batch 15	Ery_M43_B7_M15_SL	0.00332274	2.43928	7.61769
*Aspartic acid	0.00672928	0.0572831	0.458461	2.1023	4.09187	0.930451				Ery_M43_C7_M15_SL	0.00303874	2.85974	6.37339
	QC high .2	QC high 01	QC high 05	QC high 10						Ery_T47_C2_M15_SL	0	2.90954	11.0103
*Lactic acid	0.592421	3.12131	16.8772	24.0821		0.957882				Ery_M26_B3_M15_SL	0.0238866	1.59256	5.96779
										Ery_T46_B7_M15_SL	0	3.1994	14.0995
Batch 16	QC.2	QC01	QC05	QC25	QC100					Ery_C47M_B1_M15_SL	0	3.01726	5.16472
*Pantothenic acid	3.20035e-05	0.00140213	0.0229165	0.196066	0.440224	0.958563				Ery_M43_A1_M15_SL	0.00332274	2.86673	7.97793
*Aspartic acid	0.00955884	0.0804642	0.560348	2.10587	4.55204	0.954031
	QC high .2	QC high 01	QC high 05	QC high 10					Batch 16	Ery_M26_C2_M16_SL	0.0239284	1.44871	8.27325
*Lactic acid	0.827723	3.4557	20.1066	29.2654		0.963091				Ery_C47F_C5_M16_SL	0	2.90379	10.6964
										Ery_T43_A6_M16_SL	0	2.75384	7.0404
										Ery_M1_A5_M16_SL	0.00343516	0.327753	18.0296
										Ery_C47F_B6_M16_SL	0	3.0447	13.9131
										Ery_C26M_C3_M16_SL	0	1.80201	8.1596
										Ery_C47F_A6_M16_SL	0	3.93878	11.885
										Ery_T47_A6_M16_SL	0	3.08387	10.2393
										Ery_M46_C1_M16_SL	0.00285326	1.68259	11.6671
										Ery_C26M_B3_M16_SL	0	2.28041	19.4712
										Ery_C46F_B5_M16_SL	0	3.18435	5.47281
										Ery_T47_B7_M16_SL	0	2.96786	13.1036
										Ery_T26_A6_M16_SL	0	2.7275	9.11786
										Ery_M47_B3_M16_SL	0.0197978	3.67325	5.7841
										Ery_T46_A1_M16_SL	0	3.11931	12.9455
										Ery_C46M_B3_M16_SL	0	1.46453	10.9782
										Ery_C47M_C5_M16_SL	0	3.10599	9.58479
										Ery_M2_A5_M16_SL	0.0239284	0.395676	22.1939
