# Supplementary material for: A Potential Citrate Shunt in Erythrocytes of PKAN Patients Caused by Mutations in Pantothenate Kinase 2
Source: Biomolecules. 2022 Feb 18;12(2):325. doi: 10.3390/biom12020325 (PMC8869601; doi:10.3390/biom12020325)
Supplement: Supplementary file 1 [file biomolecules-12-00325-s001.zip › Table S2 Normalized GC-MS data from targeted and untargeted metabolites.xlsx]

## Sheet: targeted metabolites
	Ery_C26F_A4_M14_SL	Ery_C26F_B3_M14_SL	Ery_C26F_C4_M14_SL	Ery_C26M_A1_M12_SL	Ery_C26M_B3_M16_SL	Ery_C26M_C3_M16_SL	Ery_C43M_A3_M14_SL	Ery_C43M_B7_M1_SL	Ery_C43M_C7_M14_SL	Ery_C46F_A1_M12_SL	Ery_C46F_B5_M16_SL	Ery_C46F_C7_M14_SL	Ery_C46M_B3_M16_SL	Ery_C46M_C3_M14_SL	Ery_C47F_A6_M16_SL	Ery_C47F_B6_M16_SL	Ery_C47F_C5_M16_SL	Ery_C47M_A6_M14_SL	Ery_C47M_B1_M15_SL	Ery_C47M_C5_M16_SL	Ery_T26_A6_M16_SL	Ery_T26_B4_M14_SL	Ery_T26_C7_M9_SL	Ery_T43_A6_M16_SL	Ery_T43_B2_M14_SL	Ery_T43_C3_M12_SL	Ery_T46_A1_M16_SL	Ery_T46_B7_M15_SL	Ery_T46_C6_M14_SL	Ery_T47_A6_M16_SL	Ery_T47_B7_M16_SL	Ery_T47_C2_M15_SL	Ery_M1_A5_M16_SL	Ery_M1_B4_M12_SL	Ery_M1_C1_M14_SL	Ery_M2_A5_M16_SL	Ery_M2_B4_M12_SL	Ery_M2_C7_M14_SL	Ery_M26_A1_M2_SL	Ery_M26_B3_M15_SL	Ery_M26_C2_M16_SL	Ery_M43_A1_M15_SL	Ery_M43_B7_M15_SL	Ery_M43_C7_M15_SL	Ery_M46_A3_M1_SL	Ery_M46_B1_M12_SL	Ery_M46_C1_M16_SL	Ery_M47_A2_M14_SL	Ery_M47_B3_M16_SL
Label	carrier	carrier	carrier	carrier	carrier	carrier	carrier	carrier	carrier	carrier	carrier	carrier	carrier	carrier	carrier	carrier	carrier	carrier	carrier	carrier	control	control	control	control	control	control	control	control	control	control	control	control	patient	patient	patient	patient	patient	patient	patient	patient	patient	patient	patient	patient	patient	patient	patient	patient	patient
*Glutamic acid	0.00639086	0.00787199	0.00887427	0.00796344	0.0124081	0.00484875	0.0159101	0.0242351	0.0125888	0.00714893	0.00680403	0.00776347	0.0029287	0.00646025	0.0159553	0.0128113	0.0120385	0.0081521	0.00357493	0.00885452	0.00742438	0.00589745	0.00792217	0.00679014	0.0141905	0.00745524	0.00873247	0.0110285	0.0139676	0.0082757	0.00937919	0.0124576	0.00473347	0.00604916	0.00736074	0.00564732	0.00537479	0.00981482	0.0105865	0.00742829	0.0113872	0.00678929	0.00573594	0.00716039	0.0106965	0.00628403	0.00576371	0.0162245	0.0101514
*Citric acid	0.000274803	0.000361339	0.000223181	0.000308467	0.000420086	0.000344598	0.000515148	0.000441503	0.000304022	0.000347971	0.000284227	0.000236635	0.000245176	0.000306548	0.00052412	0.000350499	0.00044056	0.000367982	7.59e-05	0.000279551	0.000333692	0.000100946	0.000325364	0.000211525	0.000392022	0.000573081	0.000176994	0.000243844	0.000222711	0.000163837	0.000283408	0.000496121	0.000199239	0.000541597	0.000179505	0.000236719	0.000253168	0.000253622	0.00162227	0.00105835	0.00100633	0.000161121	0.000286183	0.000205272	0.000347147	0.00055131	0.00027731	0.000351642	0.000449838
*Aspartic acid	0.00812142	0.00709664	0.00707932	0.00435031	0.00515353	0.0040724	0.00665553	0.00881573	0.00693678	0.00664059	0.00719637	0.00789462	0.00330972	0.00412665	0.00890132	0.00688077	0.00656233	0.00604643	0.00755583	0.00701927	0.00616391	0.0075705	0.00661168	0.00622344	0.00609841	0.00520487	0.00704937	0.00801193	0.00800996	0.00696929	0.00670712	0.00728607	0.000740694	0.000903688	0.000925162	0.000894196	0.00073173	0.00121311	0.00417957	0.00398809	0.00327396	0.00717886	0.00610844	0.00716137	0.00502021	0.00313077	0.00380251	0.0088891	0.00830125
*beta-Alanine	0.00476236	0.00253085	0.00286172	0.00228281	0.00438504	0.00177734	0.00334381	0.00413986	0.00239869	0.00202538	0.0020609	0.001763	0.00251725	0.00284951	0.004569	0.00364772	0.00331835	0.00154861	0.00324815	0.00331053	0.0020496	0.00176136	0.0014713	0.00145177	0.00225507	0.00134759	0.00168558	0.00309994	0.00148239	0.00196891	0.00236163	0.00249996	0.00171727	0.00185973	0.0017987	0.0017686	0.00119694	0.00168969	0.00494829	0.0040821	0.00355722	0.00246011	0.00243827	0.0018525	0.00205106	0.00232763	0.00255683	0.00281977	0.0030499
*Glutaric acid, 2-oxo-	0.00335762	0.00627284	0.00752285	0.00556171	0.0527489	0.00511547	0.0217717	0.0198657	0.0242743	0.00811824	0.004317	0.00274353	0.0142959	0.0147011	0.015171	0.0106173	0.0121079	0.00310549	0.00152831	0.00157358	0.00341449	0.00105433	0.00268582	0.00953629	0.0275198	0.0121039	0.0107073	0.0264331	0.0204489	0.0100928	0.00748498	0.0246722	0.0458747	0.078245	0.0758603	0.03979	0.0516718	0.0912881	0.106803	0.0481485	0.0507308	0.0105261	0.00965688	0.012432	0.0471139	0.0303795	0.0237819	0.00365789	0.00580568
*Glutaric acid, 2-hydroxy-	0.0293905	0.0410696	0.0522674	0.0695265	0.071411	0.0447304	0.12328	0.181008	0.110188	0.0411852	0.0403774	0.0394316	0.0605478	0.0664906	0.0765684	0.0557168	0.0600356	0.031341	0.0214498	0.0228437	0.0350669	0.0185269	0.0370647	0.0363602	0.0669241	0.00370538	0.0447672	0.087536	0.0676216	0.0386363	0.0328166	0.058189	0.121262	0.152872	0.137857	0.117109	0.129626	0.229937	0.12578	0.0896476	0.0873618	0.0992818	0.0844946	0.0884269	0.155994	0.100155	0.0706326	0.0283011	0.0250541
*Creatinine	0.647976	1.89708	2.14248	1.56632	1.61168	1.4193	2.78826	2.78055	3.12551	1.5945	1.37218	1.49596	0.955592	0.95224	2.33528	1.71783	1.8274	1.03024	0.482589	2.0926	1.12947	1.46578	0.0965177	1.16584	2.20587	1.47967	1.13804	2.2016	1.77366	1.08261	0.999873	2.17066	1.64979	2.09372	1.66626	0.893336	1.23807	3.43262	0.543367	2.67538	2.00372	1.69831	2.47555	2.46987	2.18671	1.70146	1.15693	1.49847	1.13012
*Arginine	0.0156897	0.0426493	0.0287284	0.0303875	0.0492531	0.0213076	0.0650467	0.0994161	0.0501834	0.0389896	0.0256818	0.0255564	0.0292438	0.0220444	0.0406489	0.0473051	0.0439021	0.0337644	0.00961389	0.0298223	0.0261813	0.0308351	0.0328775	0.0220673	0.0361416	0.0355762	0.0220013	0.0311767	0.0319852	0.0279788	0.0311413	0.0483295	0.0316951	0.0500473	0.038371	0.0260631	0.0321427	0.0382011	0.0705358	0.0270803	0.0278385	0.0394627	0.0446155	0.0462013	0.0341704	0.0397484	0.0253726	0.0511497	0.0345693
*Lysine	0.831144	1.05224	0.939458	1.05273	1.92989	0.829979	1.46246	1.80518	1.25338	1.01778	0.785959	0.928871	0.789974	0.778905	1.43218	1.76418	1.39039	1.18282	0.668701	0.978879	1.03767	0.772059	1.24764	0.930724	1.24802	1.03103	0.807493	1.12073	1.11274	1.03375	1.36931	1.59669	0.683375	0.923397	0.843863	0.782417	0.734022	1.01831	1.70052	0.808243	0.768578	0.849283	0.899294	0.866644	0.974637	1.0412	0.91092	1.53538	1.23024
*Malic acid	0.239977	0.281941	0.321099	0.375456	0.627603	0.227617	0.603218	0.748853	0.487038	0.240587	0.184581	0.187843	0.291839	0.34963	0.334074	0.343815	0.313341	0.269816	0.1967	0.202328	0.287563	0.126881	0.298583	0.279421	0.486874	0.322699	0.281068	0.421952	0.379257	0.265023	0.301915	0.396173	0.330128	0.409084	0.395043	0.297293	0.284794	0.434413	0.356124	0.486217	0.42637	0.499765	0.421805	0.454842	0.554812	0.421214	0.347258	0.183063	0.178818
*Pantothenic acid	0	0	0	0	0	0	0.000385922	0	0.000413986	0	0	0	0	0	0	0	0	0	0	0	0	0	0	0	0	0	0	0	0	0	0	0	0.00343516	0.00514249	0.00473021	0.00216983	0.00202245	0.0029073	0.0662522	0.0238866	0.0239284	0.00312373	0.00332274	0.00303874	0.00562738	0.00544207	0.00285326	0.0222215	0.0197978
*Pyruvic acid	2.37234	2.01433	2.31753	2.02491	2.16019	1.83585	2.01063	2.87605	2.37349	2.37719	1.83723	2.10819	1.15737	1.96715	1.71472	1.72579	1.68517	2.10923	1.91442	1.42139	1.65951	1.27345	2.41896	2.14693	2.46655	1.97889	1.20459	1.68811	1.71456	1.50978	2.07872	2.0055	0.821017	1.56483	1.36533	0.941205	1.19013	1.55775	4.0058	2.82801	2.60766	2.81104	2.06378	1.92637	3.06375	2.42497	2.44756	1.76917	1.54448
*Spermidine	0.0269329	0.0344148	0.0557651	0.0487775	0.295463	0.0303152	0.141457	0.286388	0.182462	0.0137238	0.0545707	0.0625498	0.0309181	0.0118292	0.115883	0.13355	0.0880544	0.0350843	0.00415099	0.0621947	0.038887	0.0354269	0.0484419	0.0334098	0.0755304	0	0.0126204	0.0031492	0.0356764	0.0359327	0.0800532	0.0137214	0.0441275	0.0298294	0.0328405	0.0339371	0.0321893	0.0345464	0.320548	0.014965	0.0597292	0.00484186	0.00772575	0.00557028	0	0.00798435	0.0120106	0.127473	0.0697312
*Cholesterol	0.351175	0.295445	0.347035	0.347651	0.157693	0.239646	0.462338	0.222694	0.428594	0.338161	0.239389	0.437572	0.230237	0.4602	0.173991	0.186925	0.179788	0.420429	0.246699	0.210062	0.234977	0.501589	0.212292	0.233262	0.545241	0.332664	0.18803	0.321878	0.540738	0.194678	0.178921	0.370122	0.253549	0.324311	0.336152	0.204799	0.431105	0.31438	0.240617	0.314823	0.252121	0.290337	0.278349	0.259876	0.189275	0.303426	0.227982	0.531405	0.233911
*Lactic Acid	1.80089	2.17026	2.6022	4.35106	19.4712	8.1596	4.59447	4.93098	3.07219	2.88481	5.47281	2.95548	10.9782	3.46175	11.885	13.9131	10.6964	4.15209	5.16472	9.58479	9.11786	2.71241	8.07135	7.0404	3.03576	3.45544	12.9455	14.0995	4.9208	10.2393	13.1036	11.0103	18.0296	9.63436	8.67877	22.1939	8.03494	12.5282	24.3861	5.96779	8.27325	7.97793	7.61769	6.37339	11.7982	6.06067	11.6671	2.09155	5.7841
[truncated: 1 more columns]

## Sheet: untargeted metabolites
	Ery_C26F_A4_M14_SL	Ery_C26F_B3_M14_SL	Ery_C26F_C4_M14_SL	Ery_C26M_A1_M12_SL	Ery_C26M_B3_M16_SL	Ery_C26M_C3_M16_SL	Ery_C43M_A3_M14_SL	Ery_C43M_B7_M1_SL	Ery_C43M_C7_M14_SL	Ery_C46F_A1_M12_SL	Ery_C46F_B5_M16_SL	Ery_C46F_C7_M14_SL	Ery_C46M_B3_M16_SL	Ery_C46M_C3_M14_SL	Ery_C47F_A6_M16_SL	Ery_C47F_B6_M16_SL	Ery_C47F_C5_M16_SL	Ery_C47M_A6_M14_SL	Ery_C47M_B1_M15_SL	Ery_C47M_C5_M16_SL	Ery_T26_A6_M16_SL	Ery_T26_B4_M14_SL	Ery_T26_C7_M9_SL	Ery_T43_A6_M16_SL	Ery_T43_B2_M14_SL	Ery_T43_C3_M12_SL	Ery_T46_A1_M16_SL	Ery_T46_B7_M15_SL	Ery_T46_C6_M14_SL	Ery_T47_A6_M16_SL	Ery_T47_B7_M16_SL	Ery_T47_C2_M15_SL	Ery_M1_A5_M16_SL	Ery_M1_B4_M12_SL	Ery_M1_C1_M14_SL	Ery_M2_A5_M16_SL	Ery_M2_B4_M12_SL	Ery_M2_C7_M14_SL	Ery_M26_A1_M2_SL	Ery_M26_B3_M15_SL	Ery_M26_C2_M16_SL	Ery_M43_A1_M15_SL	Ery_M43_B7_M15_SL	Ery_M43_C7_M15_SL	Ery_M46_A3_M1_SL	Ery_M46_B1_M12_SL	Ery_M46_C1_M16_SL	Ery_M47_A2_M14_SL	Ery_M47_B3_M16_SL
Label	carrier	carrier	carrier	carrier	carrier	carrier	carrier	carrier	carrier	carrier	carrier	carrier	carrier	carrier	carrier	carrier	carrier	carrier	carrier	carrier	control	control	control	control	control	control	control	control	control	control	control	control	patient	patient	patient	patient	patient	patient	patient	patient	patient	patient	patient	patient	patient	patient	patient	patient	patient
1,2,4-benzenetriol	5.1e-06	6.34e-06	1.24e-05	1.65e-07	4.61e-08	4.01e-06	7.56e-06	1.77e-05	4.8e-08	9.69e-08	7.74e-06	2.18e-07	2.57e-08	1.06e-05	2.32e-07	1.3e-06	1.32e-08	7.42e-06	3.87e-06	4.68e-06	5.5e-06	4.24e-08	4.6e-06	4.44e-06	1.02e-07	6.78e-06	4.66e-07	3.23e-07	1.66e-05	4.36e-07	2.3e-07	4.27e-08	2.95e-06	1.21e-08	1.91e-07	3.94e-08	4.25e-07	3.24e-07	2.7e-07	8.71e-08	1.04e-07	9.35e-06	2.3e-06	7.19e-06	1.47e-05	5.47e-06	3.98e-06	7.95e-08	5.52e-08
1,3-dihydroxypyridine	7.92e-05	4.32e-05	5.31e-05	4.52e-05	4.27e-05	4.57e-05	4.25e-05	5.77e-05	3.6e-05	5.07e-05	5.52e-05	4.74e-05	5.19e-05	4.7e-05	3.55e-05	4.53e-05	5.04e-05	4.21e-05	5.62e-05	5.17e-05	5.21e-05	4.41e-05	5.86e-05	5.27e-05	4.45e-05	5.34e-05	4.71e-05	6.56e-05	5.63e-05	5.29e-05	4.91e-05	4.8e-05	4.63e-05	0.000871941	4.09e-05	4.56e-05	4.58e-05	3.9e-05	5.94e-05	6.74e-05	5.79e-05	5.01e-05	7.56e-05	6.45e-05	0.00172574	4.62e-05	4.9e-05	4.55e-05	4.56e-05
1,5-anhydroglucitol	0.00227119	0.00264363	0.00241831	0.000562613	0.000522611	0.00274043	0.00175291	0.00196538	0.000206944	0.000393448	0.000866121	0.00304387	0.00255331	0.000400604	0.0007185	0.00182379	0.00211687	0.000317919	0.0022323	0.00274732	0.001963	0.00227633	0.00243943	0.000121328	0.00074255	0.00279307	0.000330766	0.00202991	0.0022492	0.00210119	0.000424741	0.00257865	0.00201188	0.00213623	0.00222702	0.000536482	0.000480217	0.00181433	0.00081069	1.6e-05	0.00243141	7.04e-05	0.000987471	0.000165065	0.0029736	0.00302997	0.000261591	0.00173876	0.00184532
106699_sim to 26754_sim to 84922	0.00172097	0.00117836	0.00141347	0.0023855	0.00162416	0.00242697	0.00173499	0.000810163	0.00190071	0.00108065	0.000712614	0.00152904	0.000867731	0.00235848	0.00127664	0.00146819	0.00162117	0.00126505	0.00209916	0.00105377	0.000913819	0.00142849	0.00143712	0.00134263	0.000852834	0.00114142	0.000476023	0.00101987	0.00123483	0.000915875	0.000816789	0.000988409	0.00142764	0.0016898	0.00169373	0.00107544	0.00158451	0.00151573	0.00144371	0.00144972	0.00175884	0.00150672	0.00159832	0.00156084	0.00345715	0.000934664	0.000948564	0.000975669	0.000911024
110345 sim to 2-ketoisovaleric acid	2.22e-05	1.53e-05	1.63e-05	1.61e-05	2.47e-05	1.22e-05	2.92e-05	5.65e-05	3.29e-05	1.74e-05	4.6e-06	4.63e-06	1.46e-05	1.81e-05	1.68e-05	0.00207564	0.00237739	2.33e-05	0.00241536	1.95e-05	1.73e-05	9.39e-06	2.59e-05	1.8e-05	2.07e-05	1.93e-05	0.00265546	8.38e-06	1.13e-05	1.64e-05	1.42e-05	3.52e-05	3.34e-05	4.31e-05	4.32e-05	1.18e-05	3.51e-05	3.57e-05	2.66e-05	1.64e-05	1.65e-05	0.00217021	3.02e-05	1.88e-05	8.64e-05	5.76e-05	2.2e-05	1.34e-05	1.55e-05
120465 with phosphate contam ions	0.0169828	0.0173883	0.0158847	0.0237922	0.0184675	0.0189084	0.0202718	0.00100677	0.0236878	0.000959569	0.0232448	0.00243426	0.00138213	0.00150292	0.0169319	0.000585032	0.0189595	0.0263515	0.0220228	0.0303921	0.0135782	0.0229246	0.0293486	0.0231551	0.0226552	0.0275129	0.0291536	0.0157365	0.0208837	0.0215502	0.0222874	0.025573	0.0212496	0.0151733	0.0137682	0.000270685	0.014672	0.0129486	0.0191327	0.0173436	0.0146386	0.0136282	0.0186455	0.0185722	0.0234141	0.0162567	0.0286157	0.0177124	0.0265713
124590 asparagine minor?	0.000112256	0.000190905	0.000209688	0.000176753	4.46e-05	0.000133758	0.000217152	5.84e-05	0.000202075	0.000162234	0.000138678	0.000149162	0.000186129	0.000168396	0.000144698	0.000134871	0.000152512	0.000151256	8.36e-05	3.27e-05	1.69e-08	0.000121453	0.000139822	0.000136784	0.000202605	3.95e-05	0.000185596	0.000270933	0.000223773	0.000180597	0.000163749	2.95e-05	9.24e-05	0.000128235	0.000101035	0.000100132	5.95e-05	0.000141407	0.00011991	0.000140925	0.000173852	0.000225345	0.00020008	0.000291431	1.86e-05	8.61e-05	0.000156301	0.000163915	1.69e-08
125898 trisaccharide	0.0214196	0.0186855	0.0183423	0.0180513	0.0175614	0.0216479	0.0158667	0.0140375	0.0176098	0.0193592	0.0220157	0.0221547	0.0241815	0.0249472	0.0188794	0.0187032	0.0202272	2.69e-05	0.026046	0.0239002	0.0192289	0.0231857	0.0209567	0.0236061	0.0180021	0.00250023	0.0229267	0.0191089	0.0184027	0.0224847	0.0217603	0.0182739	0.0209431	0.0173522	0.0200132	0.0224813	0.0180905	0.0157124	0.0146181	0.0197404	0.0243265	0.017906	0.0185877	0.0194388	0.0144979	0.0183267	0.0224402	0.0195548	0.0207162
133166 some TBS derivative	3.61e-06	0.00111481	0.00112136	0.000468256	0.00126729	0.00116606	0.00147432	0.000756826	0.00172772	0.001478	0.000963672	0.00139736	0.0013546	0.00136903	0.00101622	0.00109837	0.00110047	0.00118593	0.00159578	0.00107176	0.000893149	0.00106096	0.00135783	0.00426315	0.00123836	0.00123475	0.00841296	0.00180621	0.00151229	0.000889182	0.000816345	0.00157396	0.00040845	0.00140454	0.00145666	0.000858992	0.00101616	0.00135411	0.00544712	0.00193137	0.00148685	0.00150044	0.00146254	0.000186738	0.00746215	0.00127345	0.000974487	0.00111723	0.000860331
133334 TBS	0.0162301	0.0172544	0.0165579	0.0152087	0.0135981	0.0194623	0.0140633	0.0129574	0.000272041	0.0148037	0.0193875	0.0200117	0.0208689	8.08e-06	0.0160667	0.0162747	0.0190469	0.0186167	0.0166831	0.0207242	0.0170179	0.0236548	0.020333	0.0220944	0.015729	0.0184865	0.0213056	1.62e-05	0.018575	0.0188867	0.0190332	0.017218	0.0199609	0.018091	0.0175203	0.019746	0.0170916	0.0145639	0.00949656	0.000619907	0.0190012	0.0167907	0.0227086	0.0204274	0.0163376	0.0168676	0.0189255	0.0167255	0.0171234
135765 isomer1	0.000347494	1.01e-05	2.18e-06	2.51e-05	4e-05	1.85e-05	1.09e-05	8.14e-05	0.00110535	0.00016789	5.98e-05	6.74e-05	3.19e-05	2.57e-05	5.75e-05	4.24e-05	4.25e-05	3.82e-05	0.000442522	0.000106289	2.5e-05	0.00043306	4.53e-05	0.000485921	1.06e-05	7.05e-06	7.51e-06	8.82e-08	4.57e-05	7.94e-05	0.00013252	8.89e-05	8.82e-08	0.000302871	1.29e-05	2.25e-05	7.93e-06	3.44e-06	0.000777508	5.36e-05	6.26e-05	4.15e-05	6.99e-06	1.34e-05	0.000660642	9.67e-05	0.000130614	6.67e-05	2.73e-05
135765 isomer2	7.5e-06	6.44e-06	7.27e-06	4.54e-08	5.78e-06	4.66e-06	7.06e-06	1.27e-05	9.14e-06	4.54e-08	1.37e-05	1.04e-05	5.67e-06	6.37e-06	7.3e-06	2.13e-05	2.21e-05	8.01e-06	9.56e-06	1.47e-05	7.1e-06	7.94e-06	1.55e-05	9.01e-06	6.67e-06	9.44e-06	5.15e-06	6.51e-06	8.21e-06	1.87e-05	9.98e-06	3.47e-05	4.48e-06	4.54e-08	7.46e-06	4.32e-06	8.7e-06	5.98e-06	9.26e-06	4.54e-08	4.86e-06	4.54e-08	4.54e-08	6.3e-06	1.73e-06	9.88e-06	2.28e-05	1.19e-05	1.09e-05
146264 similar to beta-gentiobiose but mz 169 is missing	0.000789601	1.19e-07	1.43e-06	3.92e-05	4.32e-05	0.000516678	0.000575916	0.000514975	0.00060069	5.88e-13	0.000581296	5.88e-13	5.66e-06	0.000992955	6.35e-05	0.000423437	8.03e-05	0.00073461	0.00063116	2.2e-06	3.39e-07	0.000530628	5.88e-13	5.88e-12	5.88e-13	5.88e-13	0.000817425	0.000690351	5.88e-13	1.12e-07	0.000755303	5.88e-13	8.46e-08	0.00071574	0.00078252	0.000649727	0.000568699	5.88e-13	0.00285571	2.11e-05	0.000785474	5.88e-13	0.000383542	2.43e-06	0.00143095	0.000632965	1.17e-06	6.14e-05	4.82e-05
1-monopalmitin	2.38e-05	2.87e-05	3.26e-08	3.85e-05	1.72e-05	1.17e-05	4.56e-05	4.62e-05	5.99e-05	3.26e-08	5.39e-05	3.68e-05	2e-05	1.5e-05	3.26e-08	4.18e-05	2.08e-05	3.26e-08	5.21e-05	3.51e-05	2.12e-05	3.26e-08	3.26e-08	3.5e-05	6.69e-05	5.43e-05	5.45e-05	3.26e-08	3.26e-08	3.63e-05	6.08e-05	3.26e-08	3.19e-05	4.29e-05	4.44e-05	2.78e-05	4.23e-05	3.44e-05	2.59e-05	2.19e-05	1.29e-05	3.26e-08	3.85e-05	4.2e-05	8.03e-05	7.44e-05	2.92e-05	3.26e-08	3.18e-05
1-monostearin	3.58e-07	3.58e-07	3.58e-07	3.58e-07	4.27e-05	3.24e-05	3.58e-07	8.92e-05	3.58e-07	3.58e-07	8.97e-05	7.36e-05	6.2e-05	3.58e-07	3.58e-07	7.3e-05	7.08e-05	3.58e-07	3.58e-07	7.3e-05	6.42e-05	3.58e-07	3.58e-07	7.72e-05	3.58e-07	3.58e-07	3.58e-07	3.58e-07	3.58e-07	7.81e-05	3.58e-07	3.58e-07	3.58e-07	3.58e-07	3.58e-07	3.58e-07	3.58e-07	3.58e-07	3.58e-07	3.58e-07	3.4e-05	3.58e-07	3.58e-07	3.58e-07	3.58e-07	3.58e-07	6.32e-05	3.58e-07	6.75e-05
2,3-dihydroxybutanoic acid NIST	0.000187936	7.8e-05	8.81e-05	9.89e-05	7.32e-05	4.51e-05	0.000116129	0.000162412	0.000146159	8.26e-05	7.17e-05	0.000124711	8.89e-05	0.000123715	0.000126722	5.77e-05	8.93e-05	7.36e-05	7.86e-05	5.32e-05	7.34e-05	7.06e-05	8.2e-05	6.88e-05	5.62e-05	5.25e-05	0.000166162	6.09e-05	6.05e-05	7.24e-05	4.44e-05	5.65e-05	6.24e-05	7.78e-05	8.5e-05	7.99e-05	6.55e-05	7.59e-05	0.000132729	7.11e-05	9.27e-05	0.000110964	0.000172563	0.000149636	0.000128362	7.31e-05	0.000141303	1.91e-05	7.05e-05
2,5-dihydroxypyrazine NIST	0.0156059	0.0166925	0.0162088	0.0113521	0.00428067	0.0124496	0.00885796	0.00521282	0.0140771	0.014833	0.0129237	0.0163856	0.0127226	0.00996404	0.00898903	0.00644476	0.00795166	0.0171091	0.016054	0.0144864	0.0132008	0.0215825	0.017503	0.0185747	0.0112551	0.0193594	0.0141118	0.019248	0.0175131	0.0175565	0.0144921	0.0125067	0.0131193	0.0161744	0.0142803	0.0118765	0.0137108	0.0148823	0.00369768	0.0188855	0.0108341	0.0119349	0.0206426	0.0188333	0.0140177	0.0121294	0.0105128	0.00717279	0.00919454
26754 sim to UMP_sim to 84922	5.2e-05	0.000680417	0.000834942	3.29e-05	7.25e-05	0.00151807	1.19e-05	4.53e-05	6.83e-05	0.000615317	0.00043521	0.00101075	0.000517506	2.63e-06	0.000789062	0.000910716	4.74e-05	0.00076228	0.00127028	0.00061477	0.000519818	2.67e-05	1.1e-05	0.000788725	0.000481012	0.000646363	0.000275142	0.000586966	0.000728485	0.000518096	0.000506954	0.000585145	4.66e-05	5.38e-05	0.00016654	0.000625635	3.03e-05	3.03e-05	0.000889083	3.72e-05	1.2e-05	1.63e-05	0.000986089	0.00095291	3.36e-05	0.000522683	5.68e-05	0.000569378	2.23e-05
2-deoxytetronic acid	0.000362248	0.000220843	0.000316822	0.000265446	0.000178067	0.000245228	0.000211481	0.000293977	0.000226094	0.000394669	0.00035935	0.000382007	0.000336596	0.000296433	0.000244046	0.000193356	0.000283338	0.000251069	0.00024316	0.000254817	0.000217836	0.000224028	0.000280156	0.000212805	0.000212917	0.000179836	0.000771567	0.000266737	0.000215731	0.000217525	0.00018171	0.000187779	0.000260227	0.000255214	0.000305729	0.000229253	0.000186701	0.000214846	0.000664926	0.000194398	0.000189664	0.00257359	0.00472627	0.00352195	0.000779681	0.000225732	0.000226757	0.00026133	0.000255145
2-hydroxy-2-methylbutanoic acid	3.45e-07	5.21e-05	6.82e-05	0.000111979	4.02e-07	2.16e-07	0.00012594	0.000172531	0.000147287	6.78e-05	1.49e-07	2.29e-06	0.000356797	0.000408526	1.26e-07	3.07e-07	1.01e-07	0.000401251	0.000227232	3.62e-07	7.31e-07	0.000138707	0.000376547	3.76e-07	1.11e-07	0.00015251	2.8e-07	0.000201123	0.000194347	8.98e-05	2.4e-07	8.64e-05	0.00157542	0.00179196	0.00185614	0.00112584	0.00110902	0.00116741	7.61e-05	0.000279095	1.09e-07	9.68e-05	0.000121915	0.000111545	1.64e-05	0.000235993	2.08e-06	2.83e-06	3.18e-07
2-hydroxybutanoic acid	0.000166758	0.00010455	0.000150725	0.000173823	0.000170949	0.000125776	0.000170189	0.000278542	0.000199642	7.02e-05	6.01e-05	7.24e-05	0.000336463	0.000429856	4.51e-05	4.01e-05	4.48e-05	0.000729997	0.00035556	0.000210209	0.000529971	0.00027041	0.000623381	0.00020899	0.000200222	0.000249078	0.000176834	0.000174511	0.00018095	9.18e-05	7.54e-05	9.32e-05	0.000639441	0.000726096	0.000764319	0.000583675	0.000617162	0.000581932	0.00011044	7.8e-05	8.01e-05	8.84e-05	0.00013125	0.000100489	0.000273598	0.000146104	0.000153935	4.61e-05	5.16e-05
2-hydroxyhexanoic acid	6.33e-05	8.38e-05	9.14e-05	0.00011411	8.68e-05	0.000130643	7.9e-05	0.000168686	8.43e-05	0.000192452	0.000111493	8.41e-05	0.000129728	8.84e-05	0.000115867	0.000116859	0.000129007	0.000172136	7.35e-05	0.000126961	0.000103618	0.000183542	0.000222334	0.000144898	8.38e-05	0.000228511	0.000109773	0.000210439	0.00010486	0.000141792	2.84e-07	0.000187906	0.000142558	0.000127131	8.08e-05	0.00012024	0.000134537	8.16e-05	1.1e-06	0.00023196	0.000152455	0.00010707	0.000151239	0.00020946	0.000268162	0.000122582	0.00013743	8.03e-05	0.000107686
2-hydroxyvaleric acid	0.000247731	0.000219101	0.000266327	0.00016909	0.000228959	0.000161416	0.000349614	0.000341104	0.00031494	0.00018687	9.87e-05	9.37e-05	0.000227992	0.000241988	0.000141627	0.000123921	0.000128311	0.000219752	0.000161353	0.000170283	0.000207146	0.000187444	0.000229451	0.00019862	0.000235594	0.000197797	0.000192832	0.000213516	0.000206174	0.000167962	0.000190165	0.000233831	0.000455839	0.00044807	0.000493619	0.000466956	0.000434243	0.000455062	0.00023574	0.000489608	0.000361081	0.000247546	0.000198066	0.000261873	0.000367926	0.00015359	0.000196527	0.00022626	0.000276129
2-ketoisocaproic acid	3.01e-05	2.89e-05	3.29e-05	1.02e-05	6.83e-05	2.07e-05	6.84e-05	8.21e-05	5.41e-05	1.43e-05	1.08e-05	1.17e-05	3.77e-05	4.35e-05	1.71e-05	2.05e-05	1.48e-05	1.61e-05	3.62e-05	1.18e-05	2.9e-05	1.06e-05	3.52e-05	2.91e-05	3.78e-05	3.15e-05	1.05e-05	1.8e-05	1.34e-05	4.94e-05	8.85e-06	5.54e-06	5.12e-05	9.45e-05	7.72e-05	6.36e-05	7.25e-05	6.55e-05	4.35e-05	5.61e-05	4.25e-05	2.32e-05	8.31e-06	2.42e-05	2.19e-05	5.1e-05	5.28e-05	9.37e-06	9.75e-06
2-methylglyceric acid NIST	4.13e-05	3.6e-05	1.99e-05	2.21e-05	2.65e-05	2.67e-05	1.9e-05	0.000173931	2.79e-05	2.15e-05	4.11e-05	2.21e-05	3.08e-05	4.78e-05	2.02e-05	2.28e-05	3.04e-05	2.14e-05	6.61e-05	2.72e-05	1.9e-05	2.82e-05	2.76e-05	3.01e-05	1.95e-05	2.32e-05	2.01e-05	2.2e-05	3.18e-05	2.88e-05	2.83e-05	2.35e-05	2.73e-05	2.73e-05	2e-05	2.09e-05	2.1e-05	1.89e-05	0.000198031	2.08e-05	3.43e-05	2.35e-05	3.97e-05	2.14e-05	4.98e-05	2.15e-05	3.81e-05	2.18e-05	2.17e-05
2-monopalmitin	2.77e-05	2.71e-05	2.8e-05	2.62e-05	5.58e-05	2.05e-05	2.67e-05	7.24e-05	2.87e-05	2.96e-05	1.69e-05	1.61e-05	3.44e-05	1.68e-05	2.48e-05	3.93e-05	2.72e-05	3.16e-05	2.88e-05	3.94e-05	2.68e-05	2.93e-05	3.08e-05	2.78e-05	2.67e-05	2.46e-05	2.54e-05	2.18e-05	1.64e-05	2.55e-05	9.23e-06	2.17e-05	2.89e-05	2.56e-05	2.74e-05	3.75e-05	2.96e-05	1.99e-05	1.03e-05	2.7e-05	2.65e-05	1.83e-05	1.85e-05	2.1e-05	9.52e-06	2.74e-05	2.87e-05	4.14e-05	4.28e-05
2-monostearin NIST	0.000635061	0.000882956	0.00084351	0.00111406	0.00134639	0.000723254	0.000568242	0.00097099	0.000371078	0.000528345	0.000297136	0.00126137	0.000339805	0.000605151	0.000892074	0.000817517	0.000610516	0.00115722	0.000391307	0.00106983	0.00037591	0.000493353	0.00100768	0.00097356	0.000113088	0.000321098	0.000700215	0.000668003	0.000678511	0.000923447	0.00082336	0.000175242	0.00036321	0.000534856	0.000835192	0.000276558	0.000378387	0.000604508	0.00164778	0.000795781	0.000829431	0.00201815	0.000470287	0.000840243	0.00250146	0.000953966	0.001008	0.00183009	0.000998433
3781 trehalose-like	2.29e-05	2.19e-05	2.12e-05	4.06e-05	2.58e-05	2.52e-05	5.77e-06	2.23e-05	1.97e-05	2.51e-05	2.03e-05	3.93e-05	2.85e-05	1.7e-05	1.56e-06	2.09e-05	2.61e-05	2.94e-05	2.43e-05	3.56e-05	2.01e-05	4.62e-06	3.66e-05	2.28e-05	1.65e-05	2.22e-05	2.75e-05	1.7e-05	2.49e-05	1.54e-05	2.98e-05	1.44e-05	1.89e-05	2.21e-05	2.22e-05	1.45e-05	2e-05	1.46e-05	2.88e-05	2.01e-05	1.47e-05	1.87e-05	2.27e-05	1.52e-05	8.51e-06	2.11e-05	2.2e-05	1.54e-05	1.03e-05
3-aminoisobutyric acid 2TMS	2.97e-05	2.26e-05	3.28e-05	3.56e-05	3.68e-05	1.88e-05	4.05e-05	4.48e-05	5.93e-06	5.63e-05	4.02e-05	7.17e-08	2.43e-05	3.04e-05	3.97e-05	5.34e-05	5.74e-05	2.5e-05	3.2e-05	2.81e-05	7.44e-06	1.96e-05	2.73e-06	3.1e-05	5.03e-05	2.73e-05	4.52e-05	5.9e-05	3.01e-05	5.48e-05	4.92e-05	7.22e-05	4.11e-05	3.52e-05	7.17e-08	3.28e-05	3.37e-05	3.25e-05	3.48e-05	5.07e-05	3.47e-05	1.98e-05	2.91e-05	4.48e-05	7.17e-08	4.15e-05	4.85e-05	4.54e-05	2.39e-05
3-hydroxybutyric acid	0.000978819	0.000615993	0.000716628	0.000630961	0.000600608	0.000549885	0.00123501	0.00168787	0.00152492	0.000538914	0.000437277	0.000503421	0.002246	0.00262904	0.000495076	0.000439006	0.000517308	0.00302151	0.00284643	0.00148638	0.0024116	0.00158599	0.00299601	0.00137201	0.00144224	0.00147704	0.00100791	0.00106972	0.00106064	0.000871566	0.000732003	0.000763635	0.00096336	0.00170589	0.00115191	0.000710193	0.000741455	0.000725869	0.000584811	0.000599158	0.000553404	0.00107775	0.00141403	0.00124192	0.00143911	0.000811663	0.000876955	0.000663009	0.00068327
3-hydroxybutyric acid_1	7.09e-05	2.19e-05	2.88e-05	0.000146483	1.76e-05	4.83e-05	3.51e-05	2.23e-05	2.81e-05	4.87e-05	1.36e-05	6.93e-05	8.63e-05	0.000147938	4.14e-05	5.15e-06	1.87e-05	9.72e-05	6.49e-05	1.88e-05	5.82e-05	3.51e-05	2.99e-05	2.11e-05	2.34e-05	1.17e-05	2.31e-05	1.42e-05	2.88e-05	2.16e-05	6.33e-05	1.25e-05	1.58e-05	3.35e-05	2.08e-05	1.7e-05	1.38e-05	7.93e-06	3.08e-06	2.84e-05	3.48e-05	4.22e-05	1.62e-05	1.87e-05	0.000343095	2.26e-05	7.57e-05	2.38e-05	4.49e-05
3-phosphoglycerate	0.000865514	0.00125788	0.000958353	0.00144768	0.00155144	0.000589382	0.00253993	0.00245845	0.00376965	0.00312762	0.00295298	0.00226747	0.00171817	0.00190405	0.00195562	0.000276684	0.00205042	0.00172265	0.000205607	0.00150703	0.00137909	0.00198242	0.00227334	0.000614892	0.00200035	0.00162911	0.0019434	0.00234193	0.00224075	0.00274304	0.00234218	0.00275239	0.000488624	0.00114738	0.00155456	0.00159794	0.00137439	0.00128064	0.00070241	0.00206582	0.000959105	0.00235904	0.00131029	0.00215626	0.00189483	0.00208798	0.00036265	0.00224453	0.000455204
44178 mz116 with formonetin contamination ions	0.000587164	0.000295711	0.000345032	0.000159009	0.000911739	0.000171957	0.000408314	0.000336736	0.000189144	7.91e-05	6.17e-05	0.000378696	9.89e-05	0.000156527	0.000486023	0.000255244	7.56e-05	7.48e-05	0.000776683	6.15e-05	0.000277545	6.85e-05	6.51e-05	0.000238464	0.000283684	0.000126161	0.000299562	0.000233561	0.000325072	0.000297902	7.6e-05	0.000432091	0.000160917	0.000246369	0.00010118	0.000184552	7.41e-05	0.000204559	0.000324715	0.00039719	0.000185032	9.61e-05	0.00104918	0.000276757	0.000477042	0.00021654	0.000216531	0.000215833	0.000616527
46224 similar to caprylic acid	1.95e-05	2.95e-05	2.75e-05	2.26e-05	2.01e-05	1.45e-05	2.16e-05	1.68e-05	2.53e-05	3.86e-05	2.1e-05	3.57e-05	2.83e-05	2.29e-05	1.64e-05	1.75e-05	2e-05	2.26e-05	3.4e-05	2.15e-05	1.62e-05	4.31e-07	1.87e-05	2.19e-05	2.67e-05	2.51e-05	2.29e-05	2.81e-05	2.19e-05	2.66e-05	1.47e-05	2.04e-05	2.73e-05	2.37e-05	2.48e-05	2.83e-05	5.49e-07	2.07e-05	6.06e-07	2.07e-05	2.22e-05	2.66e-05	3.02e-05	3.66e-05	8.54e-07	1.75e-05	1.72e-05	2.73e-05	2.41e-05
4713 sim to lactose with RI shift	0.000390994	0.000125774	0.000118509	4.77e-05	0.000179676	0.000178366	1.79e-05	0.000168214	0.000143203	0.000224576	0.000155058	0.000259555	0.000123207	0.000125375	0.000383906	0.000100068	0.000109287	0.000139917	0.000139367	0.000120126	0.000122602	0.000120372	0.000174492	0.000139598	0.000108543	0.000467189	0.000131096	0.000120619	0.000114107	0.000175759	0.000132132	0.000102189	9.1e-05	0.000100679	0.000112569	0.000108653	8.97e-05	8.58e-05	3.32e-05	0.000333086	0.000130664	0.00033409	0.000110474	0.000122198	6.23e-06	0.00014635	0.000148133	0.000281423	9.79e-05
4797 carinitine?	7.95e-05	4.65e-05	6.63e-05	4.62e-05	1.76e-05	4.83e-05	3.51e-05	2.23e-05	2.81e-05	5.77e-06	6.4e-05	6.93e-05	3.21e-05	5.58e-07	9.78e-06	1.09e-05	4.01e-05	9.72e-05	7.76e-05	4.39e-05	5.82e-05	3.51e-05	5.58e-06	9.21e-05	4.94e-05	1.17e-05	2.31e-05	1.74e-05	1.3e-05	1.65e-05	8.45e-06	1.25e-05	2.91e-05	3.35e-05	2.08e-05	2.9e-05	1.64e-05	2.26e-05	1.5e-05	2.9e-05	8.63e-06	9.31e-06	1.62e-05	1.87e-05	5.58e-07	1.59e-05	1.83e-05	0.000467967	1.33e-05
4-aminobutyric acid minor	0.000567892	0.000399207	0.000883375	0.000386044	0.00067169	0.000461485	0.000941612	0.00105548	0.000806636	0.000187783	0.000539124	0.000522421	0.000362492	0.000115639	0.000733906	0.0068247	0.000672266	0.000168361	0.000664724	0.000686833	0.000418266	0.000519119	0.000528548	0.00030179	0.000468083	0.000396238	0.000390549	0.000463775	0.000846449	0.000562345	0.000306851	0.000853399	0.000561638	0.000503166	0.000440259	0.000279204	0.000417153	0.000537229	0.0052166	0.00109275	0.000952181	0.000343117	0.000161028	0.00101999	0.000266969	0.000755159	0.000289891	0.000256874	0.000325066
4-hydroxybutyric acid	6.12e-05	0.000102383	0.000147905	9.73e-05	0.000154777	0.000135398	0.000183246	0.000179311	0.000152616	0.00021307	0.000127262	0.000101563	0.000215824	0.000215383	0.00010897	0.000127703	0.000121094	0.000240241	0.000128608	0.00016994	0.000196919	0.000187444	0.000235092	0.00016783	0.000162698	0.000194037	0.000183263	0.000261185	0.000235651	0.000142953	0.000145857	0.000224011	0.000168764	0.00014828	0.000116199	0.000137919	9.93e-05	0.000152625	0.00164857	0.000119736	0.000155157	0.000154736	0.000230529	0.000227982	0.000372842	0.000130459	0.000171254	7.63e-05	0.00013749
4-hydroxyproline	1.89e-08	1.89e-08	1.89e-08	0.00085499	1.89e-08	1.89e-08	1.89e-08	1.89e-08	1.89e-08	1.89e-08	1.89e-08	1.89e-08	2.76e-05	1.89e-08	4.39e-05	2.98e-05	3.55e-05	1.89e-08	1.89e-08	5.6e-05	3.45e-05	1.89e-08	1.89e-08	4.81e-05	6.42e-05	1.89e-08	5.82e-05	9.35e-05	1.89e-08	1.89e-08	1.47e-05	1.89e-08	5.13e-05	0.00141016	1.89e-08	1.89e-08	1.89e-08	1.89e-08	1.89e-08	0.0026807	7.95e-05	6.46e-05	1.89e-08	5.08e-05	1.89e-08	5.51e-05	1.89e-08	1.89e-08	2.99e-05
5-hydroxynorvaline NIST	0.000100549	0.000137138	0.000177186	0.00011082	5.72e-05	2.06e-05	0.00015774	2.27e-07	0.00030255	0.000160228	0.000204995	5.57e-05	9.84e-05	8.23e-05	0.000222668	0.00011644	0.000250429	9.4e-05	0.000142961	0.00017279	8.44e-05	0.000145239	0.000113376	7.92e-05	0.000112196	8.57e-05	0.000183875	9.55e-05	8.51e-05	0.000173358	0.000149599	7.6e-05	0.000123067	0.000128778	0.000130448	0.000102681	0.000104063	0.00012508	0.000120538	0.000210287	0.000153021	9.67e-05	2.27e-07	3.11e-05	0.000371257	0.000108399	0.000183312	0.000210061	8.42e-05
5-methoxytryptamine 4TMS	0.000177625	0.000144024	0.000133092	0.000140852	0.000258366	0.00011515	0.000222227	3.13e-05	0.000257956	0.000136801	9.81e-05	0.000116113	7.23e-05	7.94e-05	0.000119472	0.000158629	0.000140342	7.67e-05	0.000144649	0.000113708	8.4e-05	6.8e-05	7.15e-05	8.11e-05	0.000129103	5.51e-05	5.87e-05	8.53e-05	6.37e-05	7.3e-05	8.41e-05	8.43e-05	7.74e-05	9.5e-05	8.59e-05	7.25e-05	5.68e-05	5.6e-05	0.000415712	0.00022615	0.000244325	8.41e-05	8.32e-05	8.14e-05	5.72e-05	0.000116971	0.000116531	0.0001536	0.000135116
65051 trisaccharide	3.66e-06	3.13e-06	2.52e-06	8.92e-06	3.8e-06	7.67e-06	7.1e-06	4.51e-09	6.9e-06	3.86e-06	3.14e-06	4.21e-06	5.8e-06	5.65e-06	4.6e-06	3.27e-06	3.18e-06	3.03e-06	2.67e-06	3.28e-06	3.02e-06	3.45e-06	1.8e-06	2.33e-06	1.81e-06	2.33e-06	2.75e-06	1.48e-06	9.51e-07	2.91e-06	3.26e-06	1.31e-06	3.58e-06	3.82e-06	5.47e-06	6.72e-06	4.51e-06	2e-06	4.51e-09	1.91e-06	2.22e-06	1.92e-06	1.37e-06	1.55e-06	8.41e-06	3.66e-06	5.04e-06	3.08e-06	4.13e-06
adenine	2.04e-06	0.000436689	0.000358423	3.51e-06	0.000263896	0.000336461	4.06e-06	0.000807319	5.55e-06	0.000533732	2.04e-06	0.000526524	1.54e-06	3.03e-06	1.84e-06	0.000223212	0.000347911	0.000407936	8.67e-06	0.000502362	0.00034841	1.87e-06	0.000496651	0.000437475	0.000375731	2.63e-06	0.000330002	1.33e-06	8.55e-06	0.000341608	1.34e-06	0.000294205	0.000476868	0.00045291	0.000455131	0.000399835	6.19e-06	4.71e-05	0.000487578	2.89e-05	0.000703177	0.000304744	0.000524525	0.000391724	0.000584295	3.33e-06	0.000501887	1.23e-06	0.000240168
adenosine	0.000511852	0.00141433	0.00101971	0.000590066	0.000218936	0.00021625	0.000831556	0.000155288	0.00114695	0.00131054	0.000982117	0.00112092	0.000740646	0.000474429	0.00417226	0.000545913	0.000439633	0.00159773	0.00133027	0.000724902	0.00111099	0.00103992	0.00158041	0.00152168	0.00159908	0.00122022	0.00152416	0.00197262	0.0011538	0.00165787	0.00113944	0.0015895	0.000708532	0.000317793	0.000915751	0.000762495	0.000566539	0.000710374	5.9e-05	0.000500773	0.000242699	0.000989699	0.00101578	0.00133925	0.000572859	0.00080805	0.000912665	0.000679046	0.000344259
adenosine-5-monophosphate	0.0248138	0.0215182	0.0216084	0.0201345	0.0123048	0.0256843	0.0163315	0.0128565	0.0195618	0.0246367	0.0272286	0.0280142	0.0285004	0.0279256	0.0161757	0.0102645	0.0169944	0.0244009	0.0298327	0.0266769	0.0240344	0.02492	0.00331027	0.0280538	0.0199279	0.0250438	0.0231938	0.0223113	0.0219109	0.0240188	0.0241308	0.0185167	0.0201856	0.0204307	0.0217988	0.0226152	0.0191028	0.0171466	0.0215124	0.0159378	0.024997	0.0231399	0.0243251	0.0199939	0.012386	0.0220119	0.0271449	0.0137352	0.0192105
adenosine-5-monophosphate_1	0.0248028	0.0215067	0.0215975	0.0201243	0.000997029	0.0256721	0.00218919	0.0128565	0.000589579	0.0246367	0.0272156	0.0279945	0.0285004	0.0279256	0.0161753	0.000625891	0.00123076	0.024394	0.000749197	0.000771346	0.0240184	0.0249099	0.0270622	0.0280374	0.0199164	0.0250438	0.00170687	0.000662927	0.0218946	0.00227682	0.00179505	0.0185167	0.00147788	0.0204266	0.0217934	0.022612	0.000498417	0.0171394	0.0104404	0.0224305	0.00345976	0.0231399	0.0243251	0.024953	0.0177898	0.0220119	0.0271449	0.0137339	0.0015544
alanine	9.8e-05	1.58e-08	0.000116779	0.00010952	0.000128309	0.000132168	9.8e-05	9.9e-05	1.58e-08	1.58e-08	0.000125965	0.000108187	0.000134856	0.000104279	1.58e-08	1.58e-08	0.00013119	0.0001162	9.06e-05	0.000135483	0.000105212	0.00013175	0.000133761	0.000131644	0.000104643	1.58e-08	0.000117043	0.000116052	1.58e-08	1.58e-08	0.000127731	1.58e-07	0.000115465	0.000111688	0.000115972	0.000121918	0.000111366	1.58e-08	8.08e-05	0.000106648	0.000130689	0.000102789	0.00012507	0.000121038	1.05e-05	0.000115991	0.000125032	1.58e-08	0.000121092
alanine_1	0.0296951	0.0454322	0.0449436	0.0349937	0.046141	0.0413726	0.0378691	0.029779	0.0398474	0.0375606	0.0368749	0.0301632	0.0408432	0.0287797	0.0394838	0.0428443	0.0440364	0.0352844	0.0266609	0.0415391	0.0314407	0.0383988	0.000189891	0.0377448	0.0384687	0.0428954	0.0327558	0.0454024	0.0445985	0.0370995	0.0390249	0.0481128	0.0330985	0.038014	0.0334531	0.0349227	0.000391224	0.0376349	0.0210081	0.044554	0.0400023	0.0384882	0.0450904	0.0477363	9.32e-06	0.039084	0.035696	0.0395902	0.0382685
alanine TMS3	3.15e-07	2.85e-05	1.53e-05	2.04e-05	1.73e-05	0.000721659	1.65e-05	2.64e-05	1.18e-06	4.19e-05	1.79e-05	3.18e-05	1.49e-05	0.000918477	1.17e-05	1.11e-05	8.24e-06	4.44e-05	0.000861408	1.77e-05	2.02e-05	0.00137456	5.88e-05	2.71e-05	1.97e-05	0.00108528	1.43e-05	3.31e-05	4.38e-05	2.84e-05	1.99e-05	2.43e-05	1.22e-05	4.75e-05	2.66e-05	1.25e-05	3.9e-05	2.16e-05	8.35e-07	4.46e-05	1.24e-05	1.86e-05	2.26e-05	0.00177117	1.32e-06	1.82e-05	1.32e-05	1.32e-05	1.24e-05
allantoic acid (dehydrated) 4TMS major	0.00225882	0.00314984	0.00270315	0.00202681	0.00217377	0.0022302	0.00372611	0.00310321	0.00364191	0.00376035	0.00283927	0.0040192	0.00217942	0.00547991	0.00212348	0.00187728	0.00216832	0.00248049	0.00165807	0.00150708	0.00201133	0.0017416	0.0024003	0.00179965	0.00261946	0.00235857	0.00175952	0.00344533	0.00300232	0.00162617	0.0016426	0.00265162	0.00869835	0.00715938	0.0161156	0.0199454	0.00684659	0.0166605	0.00393333	0.00170904	0.00107147	0.00239541	0.000920946	0.00354799	0.0148293	0.00329532	0.00245006	0.00211639	0.00331778
aminomalonate	0.00203857	0.0011413	0.000927259	0.00238004	0.000864637	0.00321616	0.00404482	0.00589727	0.00442357	0.00105745	0.00118938	0.000996828	0.00105672	0.00187573	0.00306958	0.00124808	0.00398501	0.00305156	0.000422559	0.00128772	0.00101465	0.000883095	0.00249158	0.0027052	0.000948909	0.00302206	0.0025831	0.00579493	0.00355047	0.00271017	0.00109562	0.00416613	0.00301816	0.00357357	0.00352041	0.00278276	0.000972766	0.000752411	0.00210235	0.00812973	0.00321368	0.000916745	0.00109776	0.00162107	0.00241889	0.000664168	0.00106357	0.00265481	0.00263256
arabitol	0.00301371	0.00986222	0.00161441	0.00250861	0.00346278	0.00147394	0.00251409	0.00178244	0.00293525	0.00274655	0.00975044	0.00178603	0.00213101	0.0020056	0.000993008	0.000753293	0.00110105	0.00148375	0.00178057	0.00167359	0.00137682	0.00191952	0.00135707	0.00171841	0.00155905	0.00209429	0.00336319	0.0015845	0.0110864	0.0008309	0.00149602	0.000606045	0.00321732	0.00412838	0.00368319	0.00124895	0.00147535	0.00161856	0.00283692	0.00232409	0.00128013	0.0181708	0.0192037	0.012446	0.000379068	0.00296964	0.0151967	0.00286511	0.0113557
asparagine	0.000358486	0.00186666	0.00133409	0.0044442	0.00198149	0.00397825	0.00168645	0.00414106	0.00195966	5.71e-05	0.00114044	0.0006389	0.004195	0.000460154	0.00140394	0.00180558	0.00346299	0.00420463	0.00310231	0.00399552	0.00422292	0.00284653	0.00415937	0.00102105	0.00507624	0.0025868	0.00356204	0.00510625	0.00423214	0.00414373	0.0049992	0.00270577	0.000699746	0.00264141	0.000597319	0.00257851	0.00262562	0.00101645	0.000316966	0.00111963	0.0041151	0.00167274	0.0011765	0.00247273	0.00104306	0.0013625	0.00148127	0.00131245	0.00419916
asparagine 4TMS minor	0.000228246	0.00220177	0.000676238	0.000606325	0.000238109	0.000406625	0.000808071	0.00192389	0.0014334	0.00159817	0.000443764	0.000518128	0.00239274	0.00178804	0.000254676	9.7e-05	0.000510656	0.000396474	0.000264357	0.000376307	0.000318253	0.00135731	9.41e-05	0.000847129	0.000569574	0.00705783	0.00217933	0.00070409	0.000216953	0.00143752	0.000289974	0.000679766	0.00045465	0.000193622	0.000506611	0.000278977	0.000120492	0.000230196	0.00785756	0.000468137	0.000922847	0.000749677	0.00110772	0.00200586	0.00478347	0.00330796	0.0018767	0.000311906	0.000252786
asparagine dehydrated	0.000978084	0.000976499	0.00149896	0.00130077	0.000838099	0.00099563	0.00131358	0.00184634	0.00114004	0.000984085	0.000644207	0.00103534	0.00108272	0.00122902	0.000825595	0.000704935	0.000889521	0.000998536	0.000898966	0.000674628	0.000850511	0.00079636	0.0010867	0.000905951	0.000971486	0.00101821	0.000858884	0.00177589	0.00118847	0.000884619	0.000851051	0.00136101	0.000540407	0.00078132	0.0005995	0.000560398	0.000713771	0.000731553	0.00138168	0.00214595	0.00115739	0.00168981	0.00169663	0.00212515	0.00158193	0.00138369	0.000936541	0.000857135	0.000793245
asparagine minor	0.000328228	0.000146024	0.000221013	0.00026328	0.000248811	0.000169512	0.000207114	0.000629557	0.000181432	0.000211049	0.000135525	0.000265606	0.000279099	0.000405561	0.000237719	0.000234667	0.000217462	0.000182254	0.000467127	0.000229086	0.000159999	0.000151123	0.000266737	0.000177116	0.000214609	0.000140413	0.000343145	0.000394705	0.000278399	0.000288946	0.000260619	0.00029546	0.00013207	0.00016481	0.000147823	0.000146733	0.000131292	0.000173433	0.00101024	0.000392659	0.000475553	0.000251143	0.000125481	0.000278597	0.000455767	0.000171894	0.000271382	0.000231737	0.000192294
benzylalcohol	1.3e-05	6.82e-06	7.27e-06	9.56e-05	2.06e-07	1.76e-05	6.96e-06	0.000267498	7.12e-06	5.13e-05	2.8e-05	8.85e-06	2.2e-05	1.07e-05	3.13e-06	6.92e-06	2.08e-05	8.1e-06	4.33e-06	2.25e-05	2.01e-05	1.77e-06	2.37e-06	5.17e-07	1.16e-05	0.000924962	4.52e-06	1.24e-05	1.61e-05	2.05e-05	2.87e-06	1.11e-05	3.27e-05	0.000270876	4.6e-05	1.02e-05	5.85e-05	3.43e-05	2.88e-07	2.06e-07	2.45e-05	5.37e-06	8.52e-06	1.23e-05	8.36e-09	0.000142172	1.89e-07	9.11e-06	2.13e-05
beta-gentiobiose	0.000796998	0.000823541	0.000642576	0.000742232	0.000505066	0.000568923	0.000284351	0.000514975	0.000384152	0.000505049	0.000460584	0.000524946	0.00100821	0.00102128	0.000546094	0.000167547	0.000632336	0.000710001	0.000575771	0.000526769	0.000486668	0.000341971	0.000548823	0.000516913	0.000430596	0.000844105	0.000573911	0.000429245	0.000609931	0.00059152	0.000523961	0.000384569	0.000504353	0.000714297	0.000792739	0.000532785	0.000445896	0.000481553	0.00285571	0.000771606	0.000764863	0.000352927	0.000490573	0.000379624	0.00345715	0.000666093	0.000556199	0.000245298	0.000411279
beta-glycerolphosphate	0.000198235	0.000278467	0.000274444	0.000345153	0.000161078	0.000247581	0.000264318	0.000118988	0.000282283	0.000330442	0.000259292	0.000269171	8.05e-08	0.000270198	0.000165429	0.000143216	0.000192229	0.000262236	0.000198628	0.000202057	0.000259334	0.000217388	0.000264512	0.000308111	0.00033335	0.00032089	0.000275555	0.000221994	5.86e-05	0.000313139	0.000238618	0.000313455	0.000354368	7.2e-05	0.000376147	0.000402591	0.000379489	0.000457113	8.05e-08	0.000284413	0.000334984	0.000203631	0.000160032	0.000250029	8.03e-05	0.000237272	8.05e-08	0.000177012	4.3e-05
beta-sitosterol	2.67e-05	2.17e-05	2.18e-05	2.28e-05	2.2e-05	2.81e-05	1.14e-05	1.66e-05	1.39e-05	2.52e-05	2.69e-05	2.58e-05	6.35e-06	2.39e-05	2.95e-06	3.82e-05	4.02e-05	2.84e-05	2.74e-05	3.33e-05	2.7e-05	3.69e-05	3.69e-05	3.67e-05	2.6e-05	3.09e-05	3.25e-05	2.87e-05	3.28e-05	3.68e-05	2.56e-05	9.08e-06	4.3e-05	2.95e-05	2.93e-05	3.01e-05	3.19e-05	1.61e-05	1.79e-05	1.63e-05	1.38e-07	1.86e-05	1.38e-06	1.79e-05	2.68e-05	2.18e-05	1.38e-07	3.35e-05	3.07e-05
biphenyl	1.85e-05	6.95e-06	7.17e-06	1.04e-05	2.05e-05	4.23e-06	1.47e-05	2.12e-05	1.4e-05	8.49e-06	4.67e-06	8.78e-06	9.39e-06	1.43e-05	1.08e-05	1.4e-05	1.34e-05	1.02e-05	1.05e-06	3.15e-06	6.21e-06	4.83e-06	6.06e-08	6.93e-06	8.16e-06	7.57e-06	4.07e-06	1.39e-05	1.06e-05	6.18e-06	6.2e-06	1.32e-05	3.99e-06	7.27e-06	5.28e-06	3.61e-06	5.06e-06	6.74e-06	6.75e-06	9.96e-06	4.83e-06	6.97e-06	1.49e-05	1.25e-05	2.55e-05	7.09e-06	3.67e-06	7.69e-06	7.19e-06
bisphosphoglycerol NIST	1.17e-08	1.17e-08	0.000216487	1.17e-08	0.000348712	0.000210527	0.000818586	0.000968122	0.0010985	0.00063105	0.000404592	0.000584553	0.000198229	1.17e-08	0.000373301	0.000406729	0.000323693	0.000359752	1.17e-08	0.000242271	0.000211478	0.000196615	0.000408734	0.000309742	0.000412233	1.17e-08	0.000388549	0.0006233	1.17e-08	0.000395448	0.000457782	1.17e-08	0.000348138	0.000407985	0.000423429	0.00026307	1.17e-08	1.17e-08	0.000346897	6.56e-05	8.81e-05	0.000243192	1.17e-08	0.000306298	1.17e-08	0.000460844	0.00029651	0.000320758	0.000248945
butane-2,3-diol NIST	6.13e-05	7.64e-05	6.16e-05	8.9e-05	4.89e-05	5.96e-05	3.57e-05	5.39e-05	6.49e-05	1.06e-05	6.78e-05	5.56e-05	7.41e-05	2.03e-05	6.06e-05	5.87e-05	8.01e-05	7.77e-05	5.25e-06	6.15e-05	0.0283403	7.67e-05	0.000108612	0.000102582	5.46e-05	5.9e-05	0.000396601	0.0310375	7.09e-05	0.000102637	4.04e-05	4.78e-05	0.000125191	0.000378071	0.00035626	0.000313606	0.000596409	7.72e-05	5.25e-07	7.94e-05	0.000109278	5.55e-05	8.2e-05	8.1e-05	4.73e-05	5.18e-05	6.43e-06	6.2e-05	3.41e-05
butyrolactam NIST	6.4e-07	1.8e-05	1.66e-05	3.87e-05	2.19e-05	1.76e-05	3.06e-05	4.93e-05	2.27e-05	3.66e-05	2.64e-05	2.45e-05	2.57e-05	2.41e-05	3.12e-05	3.57e-05	2.79e-05	2.28e-05	3.18e-05	2.92e-05	9.92e-06	1.64e-05	1.53e-05	1.25e-05	1.87e-05	1.85e-05	1.76e-05	1.44e-05	1.24e-05	1.85e-05	2.28e-05	1.69e-05	1.24e-05	7.99e-07	2.55e-05	2.52e-05	1.92e-05	1.45e-05	4.38e-05	1.97e-05	1.37e-05	1.96e-05	1.61e-05	1.41e-05	3.23e-05	2.53e-05	2.02e-05	3.05e-05	3.89e-05
capric acid	0.000235716	3.35e-05	4.26e-05	3.68e-05	4.09e-05	2.65e-05	3.16e-05	4.25e-05	1.55e-05	3.14e-05	3.14e-05	3.42e-05	2.94e-05	2.81e-05	3.35e-05	3.95e-05	4.61e-05	5.63e-05	3.75e-05	3.11e-05	2.48e-05	2.82e-05	3.65e-05	2.88e-05	2.82e-05	1.15e-05	2.92e-05	5.4e-05	3.58e-05	2.34e-05	2.51e-05	3.24e-05	3.36e-05	3.58e-05	1.66e-05	3e-05	2.69e-05	2.72e-05	6.48e-05	8.61e-05	6.21e-05	3.92e-05	5.47e-05	5.66e-05	4.66e-05	2.15e-05	2.38e-05	8.34e-05	7.33e-05
cellobiose minor	0.000885181	0.000858144	0.00078637	0.00159635	0.00134639	0.00130312	0.000824827	0.00107911	0.000974769	0.00152534	0.00108398	0.00190474	0.000846042	0.000831565	0.000894817	0.000821165	0.000983469	0.000824322	0.000895045	0.000899559	0.000817694	0.000793737	0.000980839	0.000978389	0.000732778	0.000942116	0.000892309	0.000817588	0.000850732	0.00127327	0.000902495	0.000703357	0.000655776	0.000609997	0.00075224	0.000626646	0.000543728	0.000565334	0.000971823	0.000745973	0.00101846	0.000841603	0.00085939	0.000903921	0.00103676	0.00115121	0.00121083	0.000673333	0.000635408
chenodeoxycholic acid	4.87e-07	2.17e-06	2.19e-06	6.24e-06	2.23e-06	1.38e-06	2.13e-06	8.29e-06	6.78e-08	6.34e-06	3.95e-06	3.5e-06	2.69e-06	6.1e-06	2.5e-06	2.5e-06	3.31e-06	6.78e-09	3.14e-06	3.29e-06	1.52e-06	1.01e-06	8.38e-07	2.72e-06	2.12e-06	6.9e-08	1.36e-06	2.47e-06	1.72e-07	2.46e-06	2.94e-06	3.68e-06	3.18e-06	1.94e-07	2.98e-06	4.17e-06	2.86e-06	2.12e-06	8.94e-06	1.11e-06	2.85e-06	3.26e-06	2.29e-06	2.77e-06	8.35e-06	3.34e-06	3.64e-06	3.04e-06	1.4e-06
cholesterone minor2	8.89e-05	7.65e-05	5.82e-05	7.31e-05	5.19e-05	6.42e-05	9.35e-05	0.000109335	0.000113621	6.53e-05	0.000126652	0.000221685	8.78e-06	0.000255675	9.03e-05	8.27e-05	0.000163282	0.000158548	0.000117814	1.03e-05	5.74e-06	8.21e-05	0.000152994	0.000199138	0.000148058	8.83e-05	8.49e-05	7.38e-05	0.000142553	0.000148109	9.62e-05	8.25e-05	5.77e-05	7.5e-05	7.93e-05	2.78e-05	0.000136857	5.04e-05	5.59e-05	5.83e-05	0.000103261	0.000127771	9.52e-05	0.000113763	0.000246987	7.1e-05	1.48e-05	7.08e-05	4.39e-06
conduritol-beta-epoxide minor	0.0190184	0.000342629	0.000286884	0.000209893	0.00031187	0.000168803	0.00063629	0.000371376	0.00054486	0.000550897	0.000304098	0.000439524	0.000694973	0.000741979	0.000873951	0.000724936	0.000959912	0.000297975	0.00127624	0.000547209	0.00021213	0.000720742	0.000302374	0.000568512	0.000614344	0.000673102	0.000455018	0.00063519	0.000619449	0.000315961	0.000321398	0.000406147	0.00046765	0.000430709	0.000382677	0.000147246	0.000276509	0.000377766	0.00106346	0.000396401	0.000233309	0.00621869	0.00673994	0.00038278	0.000777303	0.000773389	0.000501676	0.000529686	0.000536191
conduritol-beta-expoxide	0.000487501	0.00051377	0.000551193	0.000474958	0.00111921	0.000466195	0.00120577	0.00118628	0.00110683	0.00168839	0.00107401	0.0015273	0.00066796	0.000601291	0.00171403	0.0019662	0.0017139	0.00148394	0.000875828	0.000910542	0.00134357	0.000616446	0.00176251	0.00102106	0.00124942	0.000992263	0.000934573	0.00140753	0.00122804	0.00103984	0.00133189	0.00147658	0.00117826	0.00132893	0.00160807	0.00102689	0.00135429	0.00125928	0.00118902	0.0010163	0.000563963	0.000451026	0.000574691	0.000598892	0.00080543	0.000597699	0.000477081	0.00405362	0.00326845
cyanoalanine	6.57e-05	4.14e-05	4.79e-05	7.27e-05	6.04e-07	5.59e-05	6.89e-07	0.000280031	4.63e-05	5.57e-05	3.6e-05	4.85e-05	6.46e-05	6.02e-05	4.55e-05	4.57e-05	6e-05	4.23e-05	1.91e-06	4.34e-05	3.84e-05	4.24e-05	4.5e-05	4.04e-05	3.39e-05	5.83e-05	4.22e-05	3.78e-05	7.91e-06	3.98e-05	4.44e-05	2.59e-05	2.51e-05	5.49e-05	3.34e-05	3.39e-05	6.52e-06	3.28e-05	3.45e-05	3.49e-05	6.34e-05	3.82e-05	6.79e-05	4.87e-05	0.000163839	7.79e-05	4.52e-05	4.42e-05	4.23e-05
cysteine	0.00039254	0.000240371	0.000373349	0.000471754	0.000986819	0.000358516	0.000660725	0.000763004	0.000272577	0.000304302	0.000196241	0.000309525	0.000168555	0.000373956	0.000773268	0.000853974	0.000616252	0.000383398	0.000367309	0.000310935	0.000359475	0.000277495	0.000563523	0.000227558	0.000466655	0.000520133	0.000315099	0.000901135	0.000504165	0.000257093	0.000466062	0.000958243	0.000287886	0.000361074	0.00030524	0.000269726	0.000260229	0.00044199	0.00124232	0.00062882	0.000236976	0.000230978	0.000313294	0.000335315	0.000347651	0.000372167	0.000219263	0.000628548	0.000611243
cysteine-glycine	0.00169661	0.000618399	0.000757324	0.00125369	0.00107353	0.000512895	0.00182913	0.00290406	0.00158481	0.00215553	0.00140608	0.00165032	0.000553209	2.83e-06	0.00120489	0.00137005	0.00114843	0.00167595	0.00559285	0.000602287	0.000742781	0.000744222	0.00171866	0.00178578	1.31e-05	0.00136447	0.00188164	0.00161209	0.00177146	0.00102741	0.00147735	0.0027081	0.00267237	5.46e-06	0.00126578	0.00186953	0.00107724	0.00111476	4.04e-05	0.000476181	1.07e-06	0.000800263	0.00104033	0.000764765	0.00127646	0.00129593	0.00101163	0.00165545	0.00113243
cysteine-glycine minor	0.00195289	0.00358712	0.00290882	0.00282828	0.00108325	0.00140591	0.00350352	0.00241573	0.00022034	0.0067607	0.00586598	0.00437697	0.00342229	0.00158149	0.00209636	0.00178834	0.00146178	0.000308949	0.00292156	0.00379419	0.000107936	0.00465427	0.00368638	0.0039025	0.00536702	0.00581121	0.00877595	0.00597517	0.00512056	0.00014224	0.0054715	0.000694793	0.00350156	0.0031118	0.00376878	0.00476898	0.000343654	0.00298576	0.00129695	0.00131003	0.000719906	0.00357272	0.00320216	0.000219337	0.00130868	0.000131461	0.00461898	0.00323728	0.00262721
cysteine-glycine minor2	4.41e-05	4.06e-05	2.28e-05	5.65e-05	7.98e-05	4.52e-05	0.00097579	6.98e-05	7.06e-05	8.29e-06	6.44e-05	5.5e-05	4.27e-05	3.38e-05	4.59e-05	4.18e-05	3.9e-05	1.69e-05	2.98e-05	0.00108515	5.45e-05	4.66e-05	5.76e-05	4.42e-06	6.19e-05	0.0015295	6.14e-05	5.23e-05	4.44e-05	5.17e-05	6.64e-05	9.71e-05	4.89e-05	4.24e-05	3.67e-05	8.03e-06	4.66e-05	5.64e-06	0.000603479	3.53e-05	3.41e-05	2.43e-06	3.03e-05	3.45e-08	0.000663209	2.26e-05	5.68e-05	6.9e-06	4.94e-05
cytidine-5-monophosphate minor	0.000297754	0.000300161	0.000286322	2.13e-05	0.000466976	0.000342588	0.000724402	0.000557621	0.000795845	0.000529054	0.000380938	0.000461001	0.000296898	0.000360461	0.000445891	0.000502867	0.00060355	0.00033529	0.000239187	0.000365906	0.00027405	0.000223061	0.000438111	0.000360648	0.000353694	0.000374119	0.000337412	0.000412804	0.000489022	0.000317967	0.000462515	0.000511893	0.000387167	0.000361056	0.00037824	0.000357274	0.000347844	0.000360192	0.000355506	0.000273106	0.000592856	0.000304952	0.000391646	0.000379916	0.00031311	5.11e-05	0.000389663	0.000457867	0.000472586
cytosin	1.89e-06	0.000515061	0.000733557	0.00122548	0.00168137	0.00104899	0.000292535	0.000234337	0.000256931	0.000329306	0.000364385	0.000345799	8.27e-07	8.87e-07	0.00117748	0.00110981	0.00141384	0.00054453	0.00123915	0.000761272	0.000610592	0.000527137	0.000631609	0.000654172	0.000582924	0.000475493	0.000732246	0.000664684	0.000524346	0.000602972	0.000670052	0.000606112	0.000496469	0.000419616	0.000502025	0.000411393	0.000306271	0.00032509	0.00255096	0.00281985	0.00358594	0.000410299	0.000297571	2.58e-06	0.000330325	0.000300748	0.000366441	0.000898402	0.00113867
dehydroascorbic acid	7.32e-05	0.000177311	0.000165698	0.000211968	0.000196897	0.000180674	0.000200972	0.000193727	0.000181095	0.000258926	0.000240205	0.000195884	0.000117204	4.1e-06	0.000197202	0.000215782	0.00028676	0.000149909	9.26e-05	0.000187036	0.000188247	0.000141637	0.000285891	0.000209356	0.000352959	0.000207879	0.000147891	0.000103299	0.000110362	0.00018193	0.000210438	0.000229606	0.000151866	0.0001599	9.96e-05	0.000156439	0.000129043	0.000118736	0.000229859	4.1e-05	0.000168615	0.000121497	0.000129859	6.44e-05	4.24e-05	0.000226413	0.000216923	0.000186901	0.000144882
dihydroxyacetone	9e-08	2.41e-05	6.95e-05	1.27e-05	2.44e-05	2.18e-05	2.2e-05	2.19e-05	2.44e-05	1.45e-05	3.11e-05	2.32e-05	3.09e-05	6.04e-05	8.19e-06	9.25e-06	9e-07	3.15e-05	1.09e-05	3.1e-05	9.18e-06	3.34e-05	2.66e-05	1.26e-05	4.43e-05	2.53e-05	1.23e-05	2.86e-05	1.32e-05	1.22e-05	1.97e-05	4.57e-05	3.44e-05	3.17e-05	1.43e-05	3.55e-05	3.48e-05	3.07e-05	4.36e-06	2.89e-05	5.09e-05	1.47e-05	2.02e-05	3.12e-05	2.31e-05	1.45e-05	1.34e-05	3.95e-05	2.3e-05
dihydroxymalonic acid NIST	0.000809232	0.000425049	0.000610149	7.64e-05	9.11e-05	1.06e-05	7.2e-07	0.00117173	0.000266412	1.76e-05	7.2e-07	9.77e-06	7.2e-07	6.57e-05	1.48e-05	0.000272813	7.2e-07	1.13e-05	0.000123829	0.000198233	3.09e-05	7.2e-07	1.14e-05	1.15e-05	4.92e-05	8.3e-06	7.2e-07	0.000249044	0.000144493	0.000313856	0.000307069	0.00058192	0.000116636	0.000153365	7.42e-05	7.2e-07	0.000200065	7.2e-06	0.00021322	0.000726314	0.000102215	1.38e-05	0.00058414	7.2e-07	0.000145998	9.48e-06	0.000348723	0.000478399	0.000135153
epsilon-caprolactam	5.04e-06	0.000115043	0.000200436	8.11e-05	0.000175928	5.77e-05	6.72e-05	5.6e-05	0.000128156	1.82e-06	1.59e-05	2.06e-05	3.94e-05	3.81e-05	4.44e-05	3.82e-05	4.31e-05	0.000155288	9.92e-05	5.76e-05	6.35e-05	0.00014098	8.55e-05	0.000128295	0.000123004	0.000311834	2.56e-05	7.87e-05	7.88e-05	1.79e-06	2.71e-05	9.79e-05	9.69e-07	6.51e-06	2.49e-06	1.74e-06	4.48e-06	2.39e-06	3.15e-06	0.000137785	8.63e-05	0.000103255	9.68e-05	0.000161855	3.11e-05	3.4e-05	1.64e-05	2.54e-05	9.44e-05
erythritol	0.00904575	0.00741153	0.00915738	0.00740737	0.00690695	0.00869849	0.00670799	0.00633309	0.005029	0.00758599	0.0080745	0.00506243	0.00955316	0.0046964	0.0070296	0.00665871	0.00772797	0.00781052	0.00930291	0.00560552	0.00765879	0.00904016	0.00845953	0.00881135	0.00724749	0.00839877	0.00991494	0.00913284	0.0087516	0.00859351	0.00757467	0.00804403	0.00830417	0.00508018	0.0061047	0.00839471	0.00811346	0.00435856	0.00100199	0.00967512	0.00629067	0.00794396	0.00452644	0.00591744	0.00239426	0.0075447	0.00837255	0.00757107	0.00806741
erythronic acid lactone	7.56e-05	7.79e-05	0.00011213	8.7e-05	8.53e-05	0.000114937	7.57e-05	0.000106893	8.23e-05	0.000119524	6.79e-05	0.000147368	5.82e-05	6.27e-05	6.02e-05	6.25e-05	8.09e-05	8.73e-05	0.000145508	5.22e-05	6.79e-05	5.53e-05	0.000107036	5.95e-05	5.97e-05	0.003752	7.57e-05	0.000229769	6.07e-05	4.54e-05	5.28e-05	2.5e-06	0.00291966	5.57e-05	3.96e-05	3.39e-05	2.97e-05	3.08e-05	0.000353847	7.55e-05	4.56e-05	0.000180248	0.00022725	0.000251329	0.000161307	8.63e-05	6.64e-05	7.58e-05	5.4e-05
ethanol phosphate NIST	1.06e-06	1.7e-07	2.19e-07	0.000219057	0.000201638	7.55e-08	0.00033085	0.000296174	1.75e-07	0.00027949	2.18e-05	0.000282728	2.07e-05	0.000319897	1.68e-07	1.44e-07	0.000229475	1.32e-07	1.01e-05	1.27e-07	1.27e-07	0.000213479	1.82e-07	1.05e-07	1.56e-07	4.51e-06	1.63e-05	0.000220151	1.31e-07	1.41e-07	0.000242664	1.94e-07	8.17e-05	5.64e-05	6.35e-05	0.000100519	7.96e-05	2.07e-05	0.000201994	0.00029597	2.62e-07	0.000237958	1.07e-07	1.68e-07	0.000156916	1.27e-07	1.38e-07	1.2e-07	0.000265376
ethanolamine	0.00053177	0.000724662	0.000764089	0.000848366	0.00110454	0.000651784	0.000896051	0.0009676	0.000660383	0.000556943	0.000570595	0.000575694	0.000900736	0.000916123	0.000518216	0.00058136	0.000716514	0.000739557	0.000320018	0.000692294	0.00048852	0.000446441	0.000557244	0.00062505	0.000653966	0.000632606	0.0004525	0.000718953	0.000694039	0.000386855	0.000310022	0.000478178	0.0004312	0.000723085	0.000564939	0.000570647	0.000656716	0.000563683	0.000861904	0.00257837	0.00262924	0.000596609	0.000436204	0.000540024	0.000848255	0.000591224	0.00060365	0.000586722	0.000648211
ethanolamine_1	0.000878478	0.00181895	5.32e-08	0.00166354	0.00217452	0.00158296	0.00110378	0.000873253	0.000968947	0.00160168	0.0029516	0.00228781	5.32e-08	0.00303311	0.00219552	0.0021319	5.32e-08	0.00201605	5.32e-08	0.00302794	0.00245365	0.00266539	0.00239417	0.00351156	0.00171266	5.32e-08	0.00318992	0.00150524	5.32e-08	5.32e-08	5.32e-08	5.32e-08	0.00319618	0.00176841	0.00228247	0.00294815	5.32e-08	0.00161063	5.32e-08	0.000818409	0.00311295	0.00140415	0.00121152	0.00151244	6.36e-05	0.00189371	0.00306897	0.00175666	0.00242962
fructose	0.00850349	0.00855098	0.00889099	0.00767095	0.00539503	0.00614232	0.00494234	0.00325347	0.00557865	0.00876345	0.00635153	0.00515757	0.00345742	0.00616655	0.00993165	0.00818891	0.0094335	0.00414718	0.0120606	0.00856546	0.00338252	0.00982192	0.00435966	0.00179951	0.00250957	0.00494824	0.00305812	0.00397129	0.00034542	0.00423712	0.00359155	0.004481	0.00126172	0.00514075	0.0056933	0.00177934	0.00470306	0.00525785	0.00389254	0.00274638	0.00227661	0.00342371	0.00374938	0.000475899	0.00516223	0.00854558	0.00420925	0.00423514	0.00391172
fructose_1	0.00261787	0.00269277	0.00259154	0.00524293	0.00358918	0.0022302	0.00266104	0.00330933	0.00302772	0.00292781	0.00207625	0.00474328	0.00414628	0.0048567	0.00349325	0.00259129	0.0029952	0.00334561	0.00361634	0.00421741	0.00273942	0.00411492	0.00376522	0.00308379	0.00328646	0.00348823	0.00267534	0.00490019	0.00285107	0.00327375	0.0031711	0.00264941	0.0163949	0.0161491	0.0161156	0.017591	0.0143512	0.0166605	0.00254863	0.00203524	0.00166617	0.00377771	0.00388509	0.00361983	0.00180989	0.00617949	0.00245006	0.0085574	0.00731083
fructose 2	0.00261787	0.00269277	0.00236752	0.00539439	0.00282723	0.00423743	0.00372611	0.00395061	0.0036624	0.0029539	0.002768	0.00534374	0.00423419	0.00547991	0.000875212	0.00399934	0.00303837	0.00340947	0.00361634	0.00421741	0.00279484	0.000697758	0.00376522	0.00308379	0.00238688	0.00315498	0.00227128	0.0037719	0.00355636	0.00335925	0.00266722	0.00349806	0.0163949	0.0144866	0.0161156	0.0176938	0.0143512	0.0167066	0.00169582	0.00240923	0.00166617	0.00377771	0.00388509	0.00430948	0.00106725	0.000691603	0.00517077	0.0107945	0.00740314
fructose 2_1	0.00261787	0.00269277	0.00259154	0.00567203	0.00358918	0.00466169	0.00325229	0.00330933	0.0036624	0.00373617	0.00312906	0.00670735	0.00468289	0.00547991	0.00349325	0.00187728	0.00425644	0.00332374	0.00361634	0.00302372	0.00273942	0.00411492	0.00366228	0.00326767	0.00238688	0.00348823	0.00267534	0.00490019	0.00355636	0.00413978	0.00266722	0.00349806	0.0186749	0.0161491	0.0179673	0.0199454	0.0160545	0.0168316	0.00254863	0.00203524	0.002085	0.00377771	0.00388509	0.00430948	0.00675437	0.00835711	0.00721009	0.0122366	0.00987713
fructose-1,6-bisphosphate 2	0.000635061	0.000601718	0.000869181	0.000725458	0.00171032	0.000723254	0.000494396	0.000587909	0.0013797	0.0029958	0.000835884	0.000935444	0.00022884	0.000144042	0.00154925	0.0010943	0.00228112	0.00115722	0.000766092	0.00195334	0.000533254	9.25e-05	0.00152589	0.000737125	0.00040503	0.00131828	0.000702928	0.000703751	0.000670981	0.00137353	0.00160593	0.00206916	0.00113358	0.000754503	0.00150767	0.00020915	0.000217586	0.000940585	0.00124249	0.000534825	0.000829431	0.00200104	0.000342826	0.00022509	0.00252205	0.00312201	0.00266841	0.00182607	0.000990661
fructose-2,6-bisphosphate	0.00156281	0.00156949	0.00176914	0.00147142	0.00118257	0.00129497	0.0059731	0.00325241	0.00862178	0.00246045	0.00198908	0.00248076	0.00163201	0.00211042	0.00118518	0.00124252	0.00139467	0.00145944	0.00160282	0.00127961	0.00126168	0.00148659	0.00162015	0.00187434	0.00220396	0.00216224	0.00173339	0.00288968	0.00445188	0.0020445	0.00161795	0.00256062	0.00198564	0.00171473	0.00160728	0.00140448	0.00205689	0.00281189	0.00063211	0.000688259	0.000809115	0.00266179	0.00332803	0.00348807	0.00309434	0.00279977	0.00221013	0.00123695	0.00100241
fructose-6-phosphate	0.000268256	0.00035075	0.000261093	0.000228285	0.000140195	0.000525085	0.000287709	0.000369391	0.000303739	0.000736582	0.000417194	0.000721743	0.000296554	0.000373869	0.000372998	6.24e-08	0.000183379	0.000293073	0.000333499	5.71e-05	7.36e-06	0.000244974	0.000351273	0.000612482	0.000433648	0.000649448	4.31e-05	0.000315106	0.000465844	0.000238101	0.000302491	3.5e-06	0.000602901	0.000581051	0.000668534	0.000453623	9.36e-05	0.000500553	0.000875411	0.000599848	0.00076478	4.62e-05	0.00032395	0.00033697	0.000372327	0.000967749	0.000770712	0.000939298	0.000941265
fumaric acid	0.000776986	0.000346725	0.000195006	0.000345536	0.000777053	0.000580525	0.000536604	0.00206435	0.000621576	0.000429738	0.000374239	0.000613527	0.000430553	0.000816426	0.000743851	0.00060567	0.000932949	0.000503365	0.000983924	0.000325442	0.000419348	0.000260306	0.000556183	0.000786388	0.000649418	0.000500079	0.000614238	0.0005056	0.00044403	0.000493911	0.000685816	0.000519707	0.000564472	0.00063388	0.000629002	0.000593194	0.000520029	0.000363333	0.000691061	0.000398952	0.00096163	0.000372519	0.00148191	0.000430634	0.000980768	0.000443777	0.000616307	0.000361428	0.000377294
fumaric acid_1	0.000717254	0.000357768	1.97e-06	2.48e-05	7.47e-06	2.68e-05	1.98e-05	0.00055405	0.00139069	3.39e-05	2.95e-05	3.68e-05	2.99e-05	0.000775544	5.74e-09	3.39e-06	1.22e-06	3.98e-05	3.26e-05	3.21e-05	0.000774346	0.000631805	4.03e-05	4.25e-05	0.000745398	0.00098235	0.000695722	4.24e-05	0.000869823	0.00078443	3.23e-05	0.0011279	0.00108073	3.73e-05	0.00123353	2.69e-05	5.74e-08	0.000976331	0.0011636	0.00103349	3.17e-07	0.000426438	4.52e-05	4.27e-05	0.00109167	2.75e-05	0.000878387	1.4e-05	0.000571006
fumaric acid_2	2.73e-05	5.16e-06	3.61e-06	0.000162072	3.44e-06	2.32e-06	2.02e-06	1.2e-05	7.96e-06	5.55e-06	2.47e-06	3.19e-06	2.51e-06	0.000169628	2.17e-06	3.44e-06	3.11e-06	2.17e-05	1.76e-06	0.000174522	1.92e-05	1.83e-06	2.3e-06	0.000178361	0.000168713	2.44e-06	1.77e-06	1.57e-06	3.76e-06	1.86e-06	1.48e-06	0.000143421	1.82e-05	5.6e-06	2.18e-05	2.87e-06	3.2e-06	0.000145283	5.63e-06	3.77e-06	0.000207089	5.36e-06	0.000230958	0.000204265	7.05e-06	3.32e-06	4.91e-06	0.000203295	0.000194789
galactinol	8.21e-05	5.09e-05	4.68e-05	9.24e-05	7.68e-05	6.42e-05	4.45e-05	7.76e-05	4.35e-05	8.15e-05	6.1e-05	7.77e-05	0.000111269	0.000132101	1.99e-05	5.72e-05	6.15e-05	5.51e-05	7.39e-05	6.79e-05	5.33e-05	0.00013736	5.41e-05	4.45e-05	4.5e-05	5.6e-05	6.8e-05	0.000293921	3.2e-05	5.5e-05	6.19e-05	4.27e-05	4.92e-05	5.98e-05	6.72e-05	6.62e-05	4.94e-05	3.11e-05	0.00011153	5.5e-05	6.6e-05	3.57e-05	0.000276566	3.18e-05	9.01e-05	5.97e-05	6.06e-05	5.31e-05	5.89e-05
galactinol 2	0.000681113	0.000601714	0.000548339	0.000642013	0.000540206	0.000646876	0.000539325	0.000456993	0.00054368	0.000791962	0.000664547	0.000721418	0.000713064	0.000798475	0.000561827	0.000541321	0.000576573	0.000702373	0.000833291	0.000678658	0.000594998	0.000661508	0.000763206	0.00069339	0.000564777	0.000160038	0.000741162	0.000562696	0.000512472	0.0006497	0.000653796	0.000582025	0.00061583	0.000621666	0.000651255	0.000663497	0.00060852	0.000469969	0.0038043	0.00059001	0.000667989	0.000533542	0.000538294	0.000630482	0.000447391	0.000771063	0.00368929	0.000578649	0.000647428
galactinol 4	0.000349116	0.000320818	0.000286483	2.9e-05	0.000314779	0.000357711	0.000307824	0.00170175	0.000289421	0.000504725	0.000336354	0.000391371	0.000358587	0.000436277	0.000308106	0.000296972	0.000324521	0.000405039	0.000443501	0.000365213	0.000298474	0.000342269	0.000448914	0.000360884	0.000289082	0.000494498	0.000421349	0.000298103	0.000276674	0.000354429	0.000348834	0.000348941	0.000324013	0.000322203	0.000366942	0.000338633	0.000314531	0.000248716	6.94e-07	0.000297989	0.000387939	0.000282183	0.000279584	0.000305608	8e-05	0.000473385	0.000444006	0.000313646	0.000399063
galactinol 5	0.00014718	0.000128959	0.000111267	0.000220259	0.000186891	0.000167354	0.000105048	0.000164685	8.81e-05	0.000161395	0.000116592	0.000145138	0.000200576	0.000221437	0.000144742	0.000123405	0.000136922	0.000147912	0.000144456	0.000150531	0.000135175	0.000122263	0.000148141	0.000128436	0.000126376	0.000156724	0.00013216	0.000117532	9.26e-05	0.000128526	0.000157372	0.000123859	0.000108708	0.000137882	0.000145071	0.000120033	0.000100429	7.75e-05	0.000194115	0.000150929	0.00017386	8.71e-05	7.64e-05	8.51e-05	0.000101744	0.000130871	0.000129808	0.000123936	0.000135211
galactitol	0.0191899	0.0149211	0.00268384	0.0163878	0.00426349	0.0183834	0.0114222	0.00431238	0.00444627	0.00410809	0.00286351	0.00405325	0.0091863	0.00566351	0.00377342	0.00472382	0.00327942	0.00348221	0.00129723	0.00541738	0.00913184	0.00959278	0.00169753	0.00445932	0.00958933	0.00218125	0.00379775	0.00567891	0.00173644	0.00330241	0.00237784	0.00515462	0.0180656	0.0151147	0.0173961	0.0178739	0.0159715	0.0182118	0.00409521	0.00724903	0.00232267	0.00240705	0.00303574	0.00328362	0.0036283	0.00192177	0.00418715	0.00563176	0.00491801
galactonic acid	0.000656736	0.000539727	0.000627374	0.000593205	0.000377507	0.000437237	0.000544592	0.000300178	0.000386493	0.00107524	0.000518882	0.000834859	0.000587188	0.000639452	0.000215353	0.000195206	0.000204854	0.000609053	0.000855834	0.000372665	0.000473881	0.000516542	0.000641066	0.000447932	0.000433473	0.000530165	0.000486924	0.000547356	0.000494859	0.000486045	0.000481919	0.000485426	0.000450292	0.00052685	0.000585521	0.00035649	0.000399318	0.000475957	0.000793645	0.00114676	0.000677382	0.000434337	0.000870589	0.000940043	0.00059165	0.000692959	0.000448564	0.000277011	0.000344667
glucoheptulose	0.00105789	0.000819766	0.000882454	0.000907333	0.000306571	0.000966601	0.000890732	0.000729678	0.00100144	0.000955363	0.00102692	0.00029994	0.00086943	0.000946027	0.000462042	0.000437951	0.000700753	0.000992151	0.00113066	0.000981709	0.000848159	0.00104321	0.000596165	0.00101699	0.000862432	0.00112776	0.000917064	0.000930529	0.000772494	0.000549041	0.000962452	0.000611577	0.00137355	0.00129449	0.0012262	0.00134823	0.00134526	0.00119242	0.00163345	0.00102403	0.000666515	0.000963538	0.000870581	0.00117843	0.000566065	0.000731257	0.000943965	0.00019068	0.000725166
gluconic acid	0.0190184	0.000692592	0.00071663	0.00099961	0.000611643	0.000782306	0.000941407	0.000759896	0.000849712	0.00161142	0.00204351	0.00127931	0.00102732	0.0011264	0.000445517	0.00043898	0.0005288	0.000565806	0.000386736	0.000248345	0.000497802	0.0174105	0.000697145	0.000543643	0.000558045	0.000682894	0.000665008	0.000707466	0.000746214	0.000716327	0.000673355	0.000616481	0.000614802	0.00063905	0.000756149	0.000474838	0.000852414	0.00971721	0.00270901	0.000753564	0.000705798	0.00622502	0.00138617	0.000914115	0.00130827	0.00141373	0.00112356	0.00045607	0.000626461
gluconic acid lactone	0.00850349	0.00296159	0.00889099	0.00426935	0.00539503	0.00338549	0.00325229	0.00378029	0.00376056	0.00376178	0.00312906	0.00406282	0.00468289	0.00358667	0.00139252	0.00187722	0.00122662	0.0123896	0.00299541	0.00301429	0.00270903	0.0157756	0.00245224	0.0019625	0.00301008	0.00304582	0.00305812	0.000394035	0.00285107	0.00171624	0.00277631	0.000631581	0.000270665	0.000527778	0.00886933	0.0176938	0.0144552	0.0168838	0.0126583	0.00218009	0.00205516	0.00254003	0.00366809	0.00361983	0.00289048	0.00359462	0.00721009	0.0122366	0.00987713
gluconic acid lactone minor	0.0024317	0.00296159	0.00259154	0.00560796	0.0204111	0.000549369	0.00325229	0.012357	0.00365455	0.00399991	0.0144326	0.00402192	0.00414628	0.00547991	0.00215717	0.00187728	0.00221249	0.00316471	0.00501304	0.00159001	0.009164	0.00530819	0.00366228	0.00274516	0.00328646	0.00255228	0.00175952	0.00637896	0.00270949	0.00413978	0.0016426	0.0027749	0.00873523	0.0161491	0.0179673	0.0200547	0.0161723	0.0168838	0.00178212	0.00170904	0.000990951	0.00176782	0.000508347	0.000475899	0.00289048	0.00341707	0.000557035	0.0122366	0.017609
glucose	0.00378488	0.0040156	0.00347619	0.00560796	0.0144432	0.00433233	0.00595819	0.00735007	0.00453478	0.0046287	0.0036777	0.00649557	0.00305522	0.00363545	0.0101195	0.0113288	0.009198	0.00686521	0.00266742	0.00541738	0.00511851	0.00306407	0.00735078	0.00445932	0.00575972	0.00218125	0.003196	0.00633643	0.0044737	0.00514556	0.00813033	0.00944193	0.014385	0.0138411	0.00323805	0.00364231	0.00257144	0.00374235	0.0108999	0.00333782	0.00337412	0.00303198	0.0029887	0.00354799	0.00052771	0.00420331	0.00433264	0.010696	0.0103487
glucose 2	0.00378488	0.00443324	0.00347619	0.00560796	0.0144432	0.00433233	0.01592	0.00735007	0.0153676	0.0046287	0.00166826	0.0192517	0.0032086	0.0206359	0.0039044	0.0113288	0.009198	0.00686521	0.00764485	0.00200589	0.00511851	0.0159237	0.0190049	0.00445932	0.00575972	0.0024941	0.0182154	0.00633643	0.0207548	0.00514556	0.00813033	0.00269537	0.0144163	0.00186071	0.0146866	0.0154782	0.00136235	0.00374235	0.0146701	0.00333782	0.00653386	0.00303198	0.0029887	0.00354799	0.0036283	0.00420331	0.0133434	0.00408235	0.0176884
glucose overload	0.000336654	0.00010642	0.00029634	0.000855781	0.00013239	0.000599799	4.68e-05	5.04e-08	3.99e-05	3.43e-05	5.04e-08	4.58e-05	0.000321802	2.57e-05	4.72e-05	8.58e-05	4.62e-05	0.000914688	0.000211764	0.00144774	0.000604833	5.77e-05	0.000147223	7.7e-05	3.38e-05	2.95e-05	5.04e-08	5.04e-08	5.04e-08	0.000153897	0.000151661	0.00131668	5.6e-05	0.00134043	0.000358839	7.15e-05	0.000348536	0.000518543	4.43e-06	5.04e-08	1.4e-05	2.82e-05	0.000205383	0.000311577	5.04e-08	0.000567221	2.98e-05	8.04e-05	0.000854326
glucose-1-phosphate	0.000269447	1.51e-06	0.000368189	0.000976564	1.51e-06	0.00111537	0.0011275	3.24e-05	0.00185707	0.00129948	0.0011656	0.00109989	0.000911093	0.000776151	0.00087797	0.000779811	0.0011779	0.000997833	4.62e-05	0.00134637	0.000960267	0.00158727	0.00130074	0.0012693	0.00111031	0.00140538	0.00124687	0.000149735	0.00207575	0.00125468	0.00108946	0.000232818	0.0013808	0.00125999	0.000219428	8.83e-05	0.0013071	0.00177966	0.000162837	0.000263473	1.51e-06	0.000677304	8.01e-05	0.001031	0.00175401	0.000999288	0.00106671	0.000787122	0.000875445
glucose-6-phosphate major	0.0016118	0.00149015	0.00140904	0.00333568	0.00372353	0.00282326	0.00183953	0.00261034	0.00275702	0.00275655	0.00247908	0.00281806	0.00216676	0.00323084	0.00266788	0.00270975	0.00164617	0.00123431	0.00238442	0.00208861	0.00195676	0.00178872	0.00185288	0.0017176	0.00241671	0.00293009	0.00162479	0.00163325	0.00225973	0.00216589	0.00170185	0.00111671	0.00273482	0.00257609	0.00119522	0.00262845	0.000928427	0.00269373	0.0054448	0.00328956	0.00630321	0.0013823	0.00163667	0.00171193	0.00620501	0.00468881	0.00466206	0.00407312	0.00529531
glucose-6-phosphate minor	0.000240302	0.000178546	0.000169397	0.00016594	0.000336322	0.000161431	0.000172699	0.000122197	0.000197744	0.000160633	0.000196136	0.00018218	0.000185061	0.000234716	0.000160747	0.000158454	0.000191855	0.000246971	0.000223103	0.000226904	0.000198228	0.00017285	0.000183661	0.000218829	0.000180515	0.000459523	0.000208949	0.000239502	0.000192254	0.000217515	0.00023331	0.000203852	0.000185723	0.000192117	0.00019048	0.000239863	0.000171509	0.000148786	5.73e-05	0.000184908	0.000187722	0.000176894	0.000166883	0.000171996	5.07e-05	0.00020655	0.000202771	0.000185644	0.000172414
glucose-6-phosphate minor_1	0.00282875	0.00264552	0.00184472	0.003423	0.00175279	0.00193261	0.00201628	0.00107213	0.0020536	0.00207209	0.00198411	0.00186952	0.001892	0.0022952	0.00156398	0.00250702	0.00239922	0.0034734	0.00368094	0.00260652	0.00266634	0.00226432	0.00245874	0.00288168	0.00231363	0.00218185	0.000668298	0.00368104	0.00256933	0.00257751	0.00263039	0.00251032	0.00236964	0.0175403	0.0165652	0.00221553	0.00217448	0.00179397	0.00836232	0.00273863	0.00317284	0.00180555	0.00193299	0.00172896	0.000937013	0.00172493	0.0224114	0.00135684	0.00423014
glutamine	0.0164131	0.00372745	0.0021863	0.0146918	0.0103715	0.0151953	0.0131702	0.0107372	0.0153753	0.0146244	0.014598	0.0147058	0.0170723	0.000958206	0.0122633	0.0115835	0.0145566	0.00141412	0.000552681	0.0185117	0.0138661	0.0200308	0.016374	0.0160111	0.0139423	0.0147713	0.014802	0.00143088	0.00204636	0.0161815	0.0139581	0.0137517	0.017025	0.00204277	0.0163925	0.0175434	0.0153633	0.0148204	0.000974678	0.0171733	0.021579	0.00169382	0.0158511	0.0179727	0.000495545	0.00178906	0.00176716	8.28e-05	0.0128734
glutamine_1	0.0063773	0.0170473	0.00121269	0.00378202	0.00275988	0.006208	0.0128663	0.00462034	0.0137187	0.0139497	0.00756368	0.0118457	0.00352097	0.011111	0.0158016	0.00344514	0.015194	0.0104609	0.0268258	0.01179	0.00132924	0.0027378	0.0107113	0.00597852	0.0113552	0.0107666	0.000711941	0.0187956	0.00674732	0.0172278	0.00981697	0.0141011	0.000561678	0.00891755	0.003858	0.00256201	0.00642849	0.00482966	0.0142907	0.00745626	0.022498	0.0204383	0.010345	0.00881612	0.0151355	0.0124898	0.0110497	0.00307042	0.0156372
glutamine 4TMS minor1	8.69e-05	3.15e-05	7.46e-05	3.13e-05	1.75e-05	1.31e-05	8.71e-05	0.000103575	0.000258706	0.000113281	0.000198106	7.37e-05	3.04e-05	8.92e-05	4.59e-05	3.54e-05	4.14e-05	8.41e-05	9.18e-05	7.99e-06	0.000188366	1.16e-05	0.000291669	0.000179721	6.96e-05	3.16e-05	8.32e-05	6.28e-05	0.000267002	0.000218188	0.000193507	6.64e-05	0.000240523	0.00020374	0.000100897	8.96e-05	0.000260989	0.000227648	5.12e-05	7.07e-05	4.56e-05	6.52e-05	0.000211011	7.39e-05	0.00011152	2.37e-05	4.47e-05	8.44e-05	3.33e-05
glutamine dehydrated	0.00314759	0.00386387	0.00318959	0.00267241	0.00829847	0.00362802	0.00718877	0.00392738	0.00517457	0.00646306	0.00690261	0.00499272	0.00720531	0.00279708	0.000230831	0.00912887	0.0024513	0.00444232	0.00480904	0.000378974	0.00583236	0.00422449	0.00015341	0.00688051	0.00913087	0.0054909	0.00950738	0.00404967	0.00905027	0.00800748	0.00996906	0.00313224	0.0041993	0.00475782	0.00383919	0.00839261	0.00601893	0.00307182	0.00831642	0.00312972	0.00520886	0.00453332	0.0032015	0.00378084	0.00515091	0.00372708	0.00547977	0.0125552	0.00734908
glutaric acid	0.000426757	0.000355633	0.000349903	0.00013706	0.000156003	0.000111259	0.000109062	0.000180326	0.000146902	0.000246692	0.000149059	0.0001066	0.000128016	0.000123046	0.000417958	0.000153091	2.39e-07	0.000352056	0.000961485	0.000147285	0.000498079	0.000335268	0.000408437	0.000408418	7.9e-05	0.000298749	0.000230052	0.000229749	0.000196937	0.000174338	0.000165344	0.000251953	6.2e-05	0.000101208	0.000269253	9.7e-05	7.73e-05	0.000207212	0.00122838	0.000173998	0.000108127	9.84e-05	0.000107576	0.00037014	0.000245377	0.000347467	0.00015912	8.14e-05	0.000720327
glutaric acid_1	0.000371931	0.00036706	0.0186455	9.89e-05	0.000368092	0.000312216	0.0002912	0.000239509	0.000125266	0.000394024	0.00295005	0.000358556	0.000665617	0.00145278	0.00019671	0.000109908	0.000416705	0.00266729	0.000287329	0.000984552	0.00354983	0.000362979	0.000575194	0.000347386	0.00196877	0.00198153	0.000235083	0.0036594	7.94e-05	0.0033247	0.00309388	0.00219365	0.00144856	0.000484973	0.00128063	0.000905184	0.00026246	0.00117876	0.0161424	0.00128922	0.00067661	0.00257359	0.00259002	0.000293677	0.00187631	0.000344155	0.00227763	0.000662579	0.000534546
glutathione	0.00227793	0.00177195	0.00176459	0.00179071	0.00112875	0.00185456	0.000371209	0.00095085	0.00199813	0.00123368	0.000435524	0.00136728	0.000545199	0.00228927	0.00129747	0.00139189	0.00181447	0.00137713	0.000809246	0.00203325	0.00178722	0.000706824	0.00109783	0.0022315	0.00157184	0.000908186	0.00232859	0.00222183	0.00102538	0.000907274	0.00217168	0.00195621	0.00213083	0.000612071	0.00141112	0.0019366	0.00721369	0.000695383	0.00126324	0.00118749	0.00147374	0.00181453	0.00197757	0.00202576	0.000784651	0.00194321	0.00220913	0.00166025	0.00174723
glyceric acid	0.0004285	0.000233106	0.000303599	0.000301694	0.000333795	0.000167572	0.000436245	0.000664023	0.000351566	0.000849879	0.000209223	0.000898698	0.000250165	0.000795696	0.000296798	0.000426859	0.000290415	0.000306228	0.000872763	0.000294876	0.000253254	0.000230597	0.000271408	0.000202866	0.000296743	0.000252161	0.00077369	0.000380044	0.000760176	0.000360421	0.00034424	0.000325585	0.000327135	0.000833076	0.000425175	0.000349155	0.00039533	0.00030135	0.00674885	0.000235699	0.000449663	0.000173866	0.000639166	0.000299779	0.00143345	0.000301317	0.000807145	0.000315326	0.000284159
glycerol	0.000318891	0.00246501	0.00225691	0.00223088	0.00304046	0.00277463	0.00212484	0.00175161	0.00232198	0.00240144	0.00269053	0.00280996	0.00287135	0.00289896	0.00242397	0.00239212	0.00267475	0.00250087	0.00357171	0.00300721	0.00237371	0.00269809	0.00271098	0.0029486	0.00237795	0.00276079	0.00272007	0.00294847	0.00251581	0.00272609	0.00271862	0.00248287	0.000129091	0.00293574	0.00331816	0.00267436	0.00217087	0.00193557	0.00672578	0.00360157	0.00305808	0.00289216	0.00334772	0.00285681	0.000365765	0.0023934	0.00293733	0.00261172	0.00270843
glycerol-3-galactoside 2	0.00387997	0.0036406	0.00357227	0.00328722	0.0029053	6.3e-05	0.00401127	0.0051648	0.0050205	0.00335187	0.00285417	0.00365009	0.00298089	0.00330745	0.00391924	0.00350364	0.00360824	0.00326528	0.00489612	0.00387423	0.00257302	0.00399754	0.00368755	0.00317527	0.00254347	0.00317224	0.00330371	0.00300527	6.63e-05	0.00329356	0.00306085	0.00277274	7.28e-05	0.00132358	7.01e-05	8.01e-05	0.00132863	0.00132984	0.00302459	0.00325771	0.00397435	5.23e-05	4.97e-05	2.31e-05	2.96e-05	0.00404916	0.00437787	0.00380278	0.00323664
glycerol-alpha-phosphate	0.00185224	0.0018517	0.00191348	0.00304861	0.00206084	0.00284207	0.00210476	0.00167119	0.00244732	0.00271093	0.00206549	0.000281178	0.00393945	0.00441949	0.00156794	0.00140817	0.00169529	0.00173819	0.0024568	0.00162157	0.00135442	0.00204868	0.00171829	0.00168686	0.00172342	0.00184807	0.00219673	0.00232474	0.00278921	0.00227267	0.00203718	0.00268982	0.00218668	0.00330335	0.00362575	0.00226358	0.00303822	0.00288914	0.000410842	0.00500385	0.00552638	0.00107182	0.00105968	0.00120634	0.000337115	0.00228474	0.00233543	0.00135143	0.00128177
glycine	0.0282826	0.0260054	0.0261175	0.0269794	0.0275166	0.0282305	0.0257716	0.0266971	0.0285742	0.0300346	0.030737	0.0316187	0.0284901	0.0282271	0.020888	0.0278262	0.0312747	0.0269002	0.0341117	0.031254	0.0247139	0.0301413	0.0303357	0.0290989	0.0249452	0.028918	0.0260807	0.027313	0.0276064	0.0270323	0.0289123	0.027425	0.0274505	0.0266416	0.0279443	0.0268699	0.0239099	0.0235109	0.023173	0.0316805	0.0365531	0.0252518	0.0314395	0.0292214	0.028712	0.0270414	0.029107	0.0279172	0.0281462
glycine_1	4.37e-05	0.0260054	4.27e-07	9.19e-06	1.08e-05	0.0282305	0.0257716	0.0207608	0.0285742	1.93e-06	6.7e-05	0.0316187	6e-05	5.72e-05	0.0284684	0.0278262	1e-05	0.0269002	0.0341117	0.031254	0.0247139	0.0301413	7.82e-07	3.27e-08	7.86e-07	0.028918	4.65e-05	3.27e-08	1.22e-06	3.27e-08	0.0109674	0.027425	6.6e-06	0.0266416	2.03e-06	1.11e-05	0.0239099	0.0235109	0.023173	0.0316805	0.0365531	0.0252518	0.0314395	6.19e-06	0.028712	0.0270414	4.9e-05	8.61e-07	0.0281462
glycine TMS1x	0.00168946	0.00430725	0.00275381	0.00399347	0.012822	0.00386424	0.00733123	0.00601736	0.00568748	0.00522185	0.0047142	0.00250032	0.00212192	0.00131455	0.00840072	0.0103606	0.00760306	0.00363295	0.00141455	0.00656145	0.00432083	0.00181531	0.00560887	0.00287395	0.00451314	0.00450158	0.00214897	0.00313461	0.0057572	0.00271545	0.0068655	0.00504653	0.00468864	0.0049346	0.00519754	0.00408689	0.00400504	0.00406074	0.00317579	0.00420412	0.0051318	0.00339541	0.00330854	0.00339006	0.0099885	0.00316741	0.00411604	0.00595342	0.00729934
glycolic acid	0.008395	0.000307468	0.00864515	0.000430392	0.000415296	0.0099855	0.00101082	0.00597676	0.00822882	0.0076814	0.000335189	0.00811395	0.0109138	0.00336203	0.00844805	0.000611543	0.000563938	0.011593	0.000435384	0.0107134	0.00855765	0.00325565	0.000401008	0.0107599	0.000300394	0.00101523	0.0092542	0.000314685	0.000409984	0.00978677	0.00921661	0.000548042	0.00973069	0.00736379	0.00775419	0.0004679	0.0004478	0.000338762	0.000503978	0.000374323	0.00048901	0.00677246	0.0251937	0.0130461	0.00162865	0.000342636	0.00989774	0.00808622	0.00928701
glycyl tyrosine	2.53e-05	3.06e-05	3.03e-05	3.76e-05	6.86e-05	8.87e-06	4.63e-05	1.56e-05	4.45e-05	4.07e-05	2.69e-05	3.85e-05	1.88e-05	1.97e-05	8.45e-05	0.000125438	7.32e-05	5.09e-05	3.22e-05	3.81e-05	3.17e-05	2.04e-05	5.45e-05	2.87e-05	4.91e-05	2.85e-05	2.41e-05	3.02e-05	3.8e-05	2.89e-05	4.87e-05	4.4e-05	2.11e-05	2.53e-05	2.72e-05	2.16e-05	1.98e-05	1.87e-05	0.000188588	3.47e-05	1.48e-05	3.02e-05	2.74e-05	2.97e-05	0.000334565	3.12e-05	2.93e-05	9.83e-05	4.64e-05
guanidinosuccinate	2.86e-07	7.23e-05	7.32e-05	7.67e-05	5e-06	7.82e-07	3.07e-06	0.000104578	8.54e-05	0.0001253	0.000100418	9.48e-05	1.83e-08	4.4e-07	2.87e-06	5.12e-06	4.44e-06	8.72e-05	1.83e-07	1.55e-06	7.53e-05	9.97e-05	6.06e-05	7.07e-05	7.55e-05	9.26e-05	1.83e-08	0.000113444	9.96e-05	5.33e-05	1.24e-06	7.52e-05	1.13e-06	8.77e-05	7.07e-05	9.53e-05	0.000113398	1.07e-06	5.14e-05	5.87e-07	9.56e-07	9.87e-05	5.88e-05	0.000103101	1.83e-08	8.12e-05	6.09e-07	5.11e-05	2.97e-06
guanine	5.98e-05	1.07e-07	5.47e-05	0.000124549	1.68e-09	2.37e-07	0.000293026	5.55e-06	1.21e-06	1.26e-06	0.000133498	1.68e-09	8.17e-05	1.26e-07	1.68e-09	1.68e-09	3e-05	5.39e-05	1.57e-07	1.52e-07	1.73e-07	1.42e-07	1.68e-09	3.59e-07	1.26e-07	1.56e-06	5.15e-08	0.0001416	8.56e-05	5.07e-08	1.68e-09	2.34e-07	9.66e-06	0.000191187	2.73e-07	4.8e-06	5.37e-07	1.58e-07	9.43e-05	9.25e-08	1.68e-08	0.000121474	1.49e-07	0.000118995	0.000214678	9.04e-07	3.37e-07	1.68e-09	8.49e-07
heptadecanoic acid	6.43e-05	7.4e-05	5.4e-05	0.000113404	0.000194291	4.6e-05	0.000112184	0.000203387	0.000152743	0.000100346	9.62e-05	0.000160183	9.81e-05	8.47e-05	0.000163847	0.000147031	0.000154965	0.000118089	6.19e-05	9.11e-05	8.8e-05	6.39e-05	0.000198808	0.000111054	6.98e-05	8.34e-05	7.6e-05	4.56e-05	8.32e-05	0.000112415	7.65e-05	6.5e-05	8.61e-05	9.73e-05	0.000110766	0.000104247	9.29e-05	5.3e-05	0.00019264	9.53e-05	8.42e-05	5.56e-05	5.06e-05	6.43e-05	0.000112803	7.12e-05	4.93e-05	0.00016126	9.61e-05
hexadecylglycerol NIST	5.02e-05	2.84e-05	2.81e-05	4.58e-05	5.64e-05	2.44e-05	4.85e-05	7.85e-05	5.55e-05	4.79e-05	3.09e-05	4.72e-05	3.35e-05	3.96e-05	3.93e-05	6.17e-05	5.61e-05	4.77e-05	4.15e-05	5.11e-05	2.73e-05	3.75e-05	5.35e-05	4.02e-05	2.94e-05	5.19e-05	3.81e-05	2.37e-05	3.59e-05	3.25e-05	4.33e-05	3.85e-05	3.37e-05	3.92e-05	3.91e-05	3.4e-05	3.67e-05	1.92e-05	0.00039218	3.28e-05	4.15e-05	2.58e-05	3.54e-05	1.85e-05	0.000296802	4.78e-05	3.68e-05	5.2e-05	4.86e-05
hexaric acid	8.88e-05	7.8e-05	7.51e-05	0.000109606	0.000295976	0.000258772	7.91e-05	0.000378595	0.000152451	0.000178699	9.49e-05	0.000116764	3.77e-05	0.000140863	3.12e-05	7.97e-05	4.45e-05	0.000336749	0.000379104	6.45e-05	2.71e-05	1.87e-05	8.21e-05	2.14e-05	0.000303237	5.53e-05	0.000120638	0.00010004	0.000113038	3.91e-05	0.000148094	0.000190731	0.000129891	4.24e-05	0.000139065	1.51e-05	6.91e-05	6.02e-05	0.000591885	1.1e-05	0.000137366	5.75e-05	7.57e-05	6.23e-05	8.24e-05	8.65e-05	3.89e-05	0.000102982	9.08e-05
hexitol	0.000219494	0.000693694	0.000551193	0.00252229	0.00079013	0.00167548	0.000491085	0.000793618	0.00169294	0.00422908	0.00107401	0.00191513	0.000501745	0.000273131	0.00171403	0.000865636	0.000402002	0.00111856	0.000451313	0.000287666	0.00206222	0.000616446	0.000177053	0.00160357	0.00134289	0.000105396	0.00156828	0.00198892	0.00183078	0.00236321	0.000110601	0.00158771	0.00102743	0.000412924	0.00140968	0.000870447	0.00124755	0.000966436	0.00270901	0.000174348	0.00157114	0.000451026	0.000574691	0.00117814	0.00629709	0.000597699	0.00397843	0.000321876	0.00326845
hexose perTMS NIST	0.00020618	8.93e-05	0.000103705	0.00013763	0.000370857	8.48e-05	0.000339785	0.000284494	0.00024356	0.000140358	6.45e-05	0.000126012	5.32e-05	6.92e-05	0.000172082	0.000187041	0.000197872	0.00015846	8.85e-05	8.06e-05	7.75e-05	8.81e-06	0.000171361	5.9e-06	0.000134057	7.53e-06	7.28e-05	0.000131747	0.000136091	8.97e-05	0.000132803	0.000252138	9.25e-05	3.47e-05	5.12e-05	6.83e-05	7.11e-05	9.58e-05	0.000741782	4.15e-06	1.55e-05	8.89e-06	7.26e-05	1.02e-05	0.000158525	1.28e-05	1.8e-05	0.000222847	4.6e-05
histidine	0.00661098	0.0111781	0.00793167	0.00931961	7.08e-05	0.00855417	0.0117435	0.00992999	0.0101417	0.0115508	4.81e-05	0.00998779	0.00776883	0.00717028	6.9e-05	0.0137986	0.0122967	0.0112991	0.00508387	0.00894845	0.00831252	0.00863006	0.0103867	0.00941888	0.0107455	0.0120422	0.0065155	0.00883979	0.00794032	4.19e-05	6.15e-05	0.0117137	0.00700705	0.0099976	4.64e-05	2.83e-05	0.00797256	0.00690509	0.00908016	0.00837219	0.00577852	0.00848864	0.00919035	0.0101896	0.00612114	0.0114338	0.00959916	0.0123433	0.0105474
homoserine	1.81e-06	3.35e-05	4.81e-05	3.02e-05	1.92e-05	2.24e-05	2.13e-05	2.73e-05	2.14e-05	2.13e-05	1.29e-05	2.08e-05	3.18e-05	2.87e-05	1.44e-05	1.13e-05	4.76e-07	2.36e-05	1.88e-05	1.28e-05	2.04e-05	1.74e-05	2.43e-05	1.7e-05	2.25e-05	2.25e-05	2.05e-05	3.71e-05	2.24e-05	1.6e-05	1.26e-05	2.36e-05	1.98e-05	2.56e-05	2.21e-05	1.75e-05	1.81e-05	2.32e-05	8.03e-06	5.56e-05	2.98e-05	3.54e-05	5.28e-05	4.92e-05	2.64e-05	2.65e-05	1.63e-05	1.44e-05	1.28e-05
hydroxylamine	0.000328258	0.000209452	0.000203702	0.000270149	0.000262635	0.00026044	1.19e-05	4.32e-05	0.000154857	0.000310695	0.000352834	0.000300194	4.93e-06	0.000299884	0.000177879	0.000175349	0.000174043	0.000263338	0.000345468	0.000287889	0.000185876	0.00020225	1.11e-05	0.000181197	8.14e-06	0.000341303	0.000341127	6.02e-06	0.000129786	0.00021696	0.000319118	0.000179972	0.000240948	0.000252463	0.000193818	0.000306748	4.97e-05	0.000129989	0.000229314	0.000291302	0.000335169	0.000184889	0.00022033	0.000209043	4.61e-07	0.000779019	0.000320809	0.000256973	0.00713164
hypoxanthine	0.00635012	0.00908263	0.00760931	0.0129046	0.0151446	0.0105581	0.0128663	0.0126922	0.0137187	0.0139497	0.00756368	0.0118457	0.00431282	0.0110503	0.0157651	0.0160635	0.0151159	0.0104609	0.00378763	0.0117698	0.00840949	0.00270769	0.0107113	0.0059584	0.0113552	0.0107666	0.00119281	0.00783393	0.00674732	0.00165082	0.00978032	0.0141011	0.000561678	0.00886619	0.00241533	0.00505102	0.00642849	0.00482966	0.0110811	0.00745626	0.0072109	0.00997338	0.00248575	0.00881612	0.00935166	0.0124506	0.0110411	0.0162877	0.0155796
inosine	7.14e-05	0.000137055	9.28e-05	0.000504931	0.00153215	0.000228296	0.000672411	0.00104512	0.000300891	0.00021302	0.000102417	8.81e-05	0.000104912	0.000145482	0.00106351	0.000167243	0.000176021	0.000171631	2.38e-05	0.000122956	0.000141919	7.79e-05	0.000137688	7.52e-05	0.000214758	0.000141794	1.4e-05	0.00016047	8.83e-05	2.02e-05	0.000209659	0.000104046	4.78e-05	0.000195491	8.94e-05	8.19e-05	7.96e-05	0.000106751	0.000632694	5.32e-05	4.99e-05	5.13e-05	6.82e-05	0.000100736	0.000341001	0.000222021	0.000131573	0.000106612	0.000135091
inosine_1	0.000993856	0.00112853	0.000952773	0.0023239	0.0046511	0.0012105	0.00307186	0.00322263	0.00173596	0.000508449	0.000974671	0.000701841	0.00116729	0.00092337	0.00409136	0.00507816	0.00407947	0.00118462	0.00194561	0.0015425	0.000969948	0.000929904	0.0018089	0.00138712	0.00135125	0.00126726	0.000429431	0.00111848	0.00166293	0.00180776	0.00116419	0.00143976	0.00153404	0.00018301	0.000860618	0.00138679	0.00117351	0.00121495	0.00163205	0.000922227	0.00159427	0.000675009	0.00148679	0.00123466	0.00413921	0.00132909	0.00107066	0.00220424	0.00327062
inosine-5'-monophosphate	0.0193515	0.018008	0.0167104	0.0212917	0.0250712	0.0214907	0.0188137	0.017166	0.0154654	0.0198938	0.0190521	0.0205159	0.00241932	0.0175168	0.0254303	0.0254633	0.0280074	0.0215091	0.0062816	0.0291267	0.0221737	0.00331356	0.0235502	0.0174146	0.0154039	0.0212097	0.0110748	0.0195088	0.0172774	0.00878281	0.0277145	0.0253572	0.0107078	0.0165233	0.00983968	0.0111112	0.00960026	0.0082897	0.000206363	0.0247289	0.0297841	0.0159292	0.0180181	0.0149962	0.000163219	0.019002	0.0179049	0.0271837	0.0286178
inositol-4-monophosphate	0.000158021	0.000111554	0.000105432	0.000156373	0.000319518	0.000145526	0.000376285	0.000407555	0.000292868	0.00019169	0.000134757	0.000185509	7.34e-05	9.58e-05	0.00019894	0.000243428	0.000157807	0.000140154	0.000141054	0.000145142	0.000149954	8.73e-05	0.000128523	0.000117908	0.000136654	0.000120037	8.88e-05	0.000223989	0.000139307	0.000110533	0.000128305	0.000139712	0.000105399	1.63e-05	0.000107799	0.000154219	0.000140919	0.000106835	7.05e-06	0.000100943	7.5e-05	0.000143169	0.00011588	0.000140709	2.33e-05	2.21e-05	0.000154858	0.000225055	0.000283493
inositol-4-monophosphate_1	0.00106119	0.00174678	0.00059939	0.000449801	0.000998108	0.000504564	0.0013571	0.00100348	0.000706035	0.000564867	0.000304325	0.000684832	0.000931128	0.000963964	0.00033324	0.000389943	0.000380634	0.00116629	0.000947307	0.000429557	0.000965494	0.000272891	5.24e-05	0.000322428	0.000174923	0.000376249	0.000168019	0.000812152	0.000342589	0.00032192	0.000335403	0.000602787	0.000296636	0.000727886	4.64e-05	0.000405955	0.000847272	0.000260008	0.00367504	0.000760589	0.000157698	0.000379898	0.00129966	0.00132193	0.00462845	0.00141311	0.00031085	0.000274803	0.00100949
isobutene glycol NIST	3.76e-05	3.18e-05	3e-05	2.79e-05	1.55e-05	1.83e-05	3.57e-05	2.78e-05	4.09e-05	2.58e-05	3.63e-05	4.62e-05	4.56e-05	5.8e-05	2.71e-05	2.83e-05	3.87e-05	4.21e-05	4.78e-05	3.67e-05	3.06e-05	3.64e-05	4.12e-05	4.42e-05	4.37e-05	2.59e-05	3.05e-05	2.28e-05	4.44e-05	4.07e-05	2.65e-05	2.78e-05	2.4e-05	2.46e-05	3.22e-05	3.32e-05	3.98e-05	2.18e-05	2.42e-05	3.11e-05	2.35e-05	3.81e-05	3.23e-05	3.07e-05	5.51e-05	2.47e-05	2.36e-05	2.47e-05	3.79e-05
isohexonic acid	0.000596288	0.00059608	0.000598862	0.000790641	0.000636967	0.000534372	0.000544163	0.00055938	0.000459419	0.00122544	0.000601232	0.00102687	0.000943495	0.00116597	0.000249256	0.000244233	0.000261981	0.000322022	0.000121969	0.000118324	0.000181371	0.00011241	0.000396561	0.000236531	0.000289091	0.000302804	0.000395966	0.000488851	0.000481103	0.000406103	0.00045093	0.000429673	0.000241351	0.000215478	0.000319966	0.000215888	0.000228448	0.000261635	0.00444258	0.000408427	0.000187065	0.000311643	0.000346073	0.000357521	0.00039244	0.00155525	0.00114775	0.000735001	0.000750228
isoleucine	0.00336488	0.00356797	0.0035516	0.00706626	0.0177996	0.00490949	0.0102228	0.0118712	0.00694763	0.00275453	0.00289365	0.00282148	0.00258463	0.00356816	0.0140498	0.0206338	0.0150232	0.00831469	0.00196167	0.00696614	0.00513201	0.00158852	0.00813237	0.00225696	0.00613579	0.00543861	0.00145091	0.00744112	0.00696325	0.00326264	0.00939433	0.0146039	0.00274292	0.00527811	0.0034603	0.00435624	0.00475068	0.00710258	0.00429857	0.00496911	0.0057212	0.00235209	0.00399059	0.0028921	0.00419059	0.00451965	0.00345432	0.0144739	0.0108077
isoleucine_1	0.000411527	0.00031226	0.000253776	0.000306004	0.000219319	0.000367641	0.000277187	4.43e-05	0.00034742	1.43e-05	0.000309325	0.000379967	0.000397911	0.00036686	0.000347273	0.000270915	5.2e-05	3.77e-06	0.000496194	3.04e-05	0.000330352	0.000397333	0.000492096	3.25e-05	0.000342575	0.000502136	6.73e-05	0.000367398	0.000308222	0.000393829	2.61e-06	0.000258576	8.91e-06	0.000271615	0.000346386	0.000361904	0.000382297	0.000277653	0.000228683	0.000452778	0.000511357	0.000320712	0.000393699	8.64e-06	0.000383565	0.000333079	0.000487769	0.000322608	0.000345965
isoleucine 1TMS	0.00108657	8.38e-05	9.35e-05	0.00124083	0.009404	0.00070161	0.000996023	0.00266888	2.49e-05	0.000612	0.000398992	0.000850154	0.000561958	0.00135474	0.00368799	0.00582786	0.00215514	0.00164761	0.000620114	0.00130345	0.000972629	0.000267995	0.00154532	0.000528334	0.000449051	2.27e-05	0.00011918	2.42e-05	3.72e-05	0.00046755	0.00206685	2.89e-05	0.00052634	0.00015356	7.32e-05	0.00082057	3.21e-05	2.66e-05	0.00619168	5.81e-05	0.00212264	7.12e-05	1.87e-05	1.28e-05	0.000432085	8.38e-05	0.000973225	0.00427325	0.00299528
isomaltose minor	0.00361524	0.00326376	0.00299725	0.00363134	0.00306116	0.00346243	0.00270585	0.00240281	0.0029452	0.00376358	0.0034891	0.00361622	0.0036985	0.00391604	0.00329356	0.00320339	0.00338203	0.00364409	0.00431563	0.00417934	0.0031132	0.0037002	0.00408424	0.00372221	0.00302208	0.00409397	0.00366355	0.00293109	0.00272746	0.0037444	0.00373411	0.0029662	0.0032147	0.00338898	0.00344594	0.00371469	0.00333806	0.00260369	0.00386601	0.0030227	0.00345361	0.00275498	0.00291215	0.00313439	0.000632928	0.00370266	0.00368548	0.00305149	0.00340607
isothreonic acid 1	0.00411274	0.00465621	0.0058901	0.00567143	0.00516387	0.0043471	0.00782984	0.00785251	0.00962221	0.00600233	0.00443294	0.00487114	0.00476602	0.00463753	0.00400869	0.00387087	0.00422325	0.00391632	0.00620109	0.00489305	0.00345944	0.00423636	0.00459323	0.00319701	0.0142582	0.00530854	0.00379739	0.00615316	0.00542872	0.0035756	0.00310848	0.00650997	0.0047819	0.00716471	0.0053103	0.00354337	0.00456227	0.00598733	0.0118887	0.00925472	0.006456	0.00526384	0.00699365	0.00612114	0.0147177	0.0050935	0.0150917	0.00365878	0.00340347
isothreonic acid 4	0.014773	0.013526	0.0165167	0.0154433	0.0126617	0.0116405	0.0150007	0.0139931	0.0144781	0.0176152	0.0141857	0.0168181	0.0113051	0.012351	0.0130901	0.0124621	0.0149196	0.012569	0.0111773	0.00790378	0.0135877	0.00854045	0.0155386	0.0116538	0.0142582	0.0127482	0.0139298	0.0168471	0.0176194	0.0108351	0.00880423	0.0147943	0.00546765	0.00770584	0.00653647	0.00525336	0.0064299	0.00797032	0.00767475	0.0147869	0.0118758	0.0166993	0.0226655	0.0185841	0.0148026	0.0174036	0.0150917	0.0139319	0.0110695
keto-hexonic acid	0.000153126	0.000183141	0.000116653	0.000269984	0.00045042	0.000182333	0.000186164	0.000182931	0.000134693	0.000244594	0.000141911	0.000265486	0.000119694	0.000164555	0.00028439	0.000965865	0.000244457	0.000171723	0.000211652	0.00017725	0.00011282	0.000198829	0.000191794	0.000143162	0.000166123	0.000178166	8.89e-05	0.000130894	0.000123456	0.000354367	0.000174591	0.00016734	0.000188794	0.000222734	0.000210267	0.000181322	0.000230067	0.000359477	9.76e-05	0.000225072	0.000191644	0.000216122	0.000235499	0.000266961	0.000214805	0.000229569	0.000170144	0.000356414	0.000358404
lactamide	9.33e-05	6.79e-05	2.44e-07	0.000113537	0.000172967	1.59e-06	8.69e-05	0.000133142	1.6e-07	8.83e-05	1.14e-07	5.22e-08	9.85e-05	0.000136482	9.03e-05	0.000102789	1.52e-06	0.000103515	0.000100424	8.41e-05	7.45e-05	5.55e-05	1.21e-07	7.12e-05	9.72e-05	8.51e-05	0.000163464	0.000132707	0.000144866	0.000146335	9.67e-05	4.18e-06	0.000193954	2.01e-06	6.22e-09	0.000198695	0.000193735	0.000190422	0.000108939	5.09e-05	7.47e-05	6.41e-05	7.58e-05	2e-07	0.00016493	9.58e-05	0.000109384	9.95e-05	7.26e-05
lactitol	0.000723309	0.000701345	0.000604441	0.00102028	0.00134639	0.000694802	0.00106763	0.00125175	0.00112533	0.000865304	0.000504568	0.000937065	0.000399138	0.000450012	0.00100577	0.00110672	0.0011304	0.000744697	0.000701095	0.000876643	0.000629792	0.000788738	0.00076167	0.000601747	0.00182943	0.000848666	0.000393471	0.000536322	0.000540904	0.000655708	0.00082578	0.000702154	0.000546765	0.000712764	0.000793681	0.000751662	0.00063053	0.000564199	0.000972759	0.000399287	0.00023733	0.000514602	0.000429578	0.000446956	0.00125976	0.000805519	0.000811969	0.000903321	0.000755369
lactobionic acid	0.000635061	0.000601718	0.00172991	0.000654828	0.00205616	0.000723254	0.000494396	0.00097099	0.00171794	0.0029958	0.000835942	0.00263876	0.000266059	0.000460892	0.00155089	0.000246681	0.00228129	0.00115722	0.000766092	0.000611802	0.000533254	0.00091917	0.00191074	0.000737102	0.000409111	0.00131828	0.000731106	1.29e-06	0.00175539	0.00137346	0.000380962	0.00207096	0.000649517	0.000754503	0.00150767	0.000310768	0.000827447	0.00118968	0.00395762	0.000534825	0.000509744	0.00200104	0.000342826	0.00022509	0.00779712	0.00312201	0.00267075	0.000957438	0.00165106
lactobionic acid 2	6.07e-05	5.9e-05	5.73e-05	5.52e-05	4.03e-05	4.5e-05	4.44e-05	0.000176446	8.62e-05	6.37e-05	9.45e-06	6.29e-05	7.86e-05	7.68e-05	4.44e-05	4.22e-05	5.19e-05	5.16e-05	4.96e-05	1.41e-05	5.1e-05	4.12e-05	6.67e-05	5.86e-05	4.58e-05	6.18e-05	4.89e-06	3.14e-06	5.24e-05	5.33e-05	6.39e-05	5.78e-05	4.91e-05	5.19e-05	8.58e-06	4.85e-05	4.19e-05	4.02e-05	0.00159002	5.95e-05	6.25e-05	3.84e-05	3.76e-05	4.22e-05	0.000163499	1.63e-05	6.24e-05	3.5e-05	3.79e-05
lactulose 1	7.18e-05	0.000165883	8.69e-05	0.000148525	0.000122112	8.46e-05	0.000239673	8.27e-06	0.000147004	0.000388441	9.88e-05	0.000152674	4.91e-05	9.92e-05	0.000154837	6.34e-06	0.000103086	0.000183085	8.99e-05	8.57e-05	0.000155731	8.7e-05	0.000139208	0.000196416	0.000165746	0.000422759	0.000111576	0.000142621	0.000144495	0.000117857	0.000119793	0.000287893	5.16e-05	0.000149701	0.000154743	8.13e-05	0.000134357	0.000104876	5.05e-06	4.08e-05	7.8e-06	0.000120328	0.000128935	9.09e-05	0.000189572	0.00038373	9.87e-05	0.000149311	0.000179423
lanosterol	6.3e-06	1.04e-05	8.9e-06	9.3e-06	1.16e-06	3.05e-05	5.32e-08	1.49e-05	5.32e-08	1.43e-05	8.99e-06	5.32e-08	1.61e-05	1.21e-05	1.68e-05	1.29e-05	2.42e-06	1.44e-05	1.18e-05	2.09e-06	1.19e-06	5.2e-06	2.73e-06	2.39e-06	5.32e-08	1.46e-05	1.07e-05	1.12e-05	6.85e-06	2.4e-05	2.24e-06	5.98e-06	2.16e-06	9.81e-06	1.11e-05	2.18e-06	1.87e-06	5.32e-08	1.68e-05	1.25e-05	3.27e-06	1.39e-05	6.99e-06	1.42e-05	3.64e-06	1.38e-05	7.7e-06	1.52e-05	5.25e-06
lauric acid	5.98e-05	4.13e-05	8.64e-05	0.000106474	0.000111788	8.74e-05	0.000102582	0.000145678	7.91e-05	6.78e-05	5.85e-05	6.37e-05	8.17e-05	8.75e-05	9.63e-05	0.000124571	0.000126474	5.51e-05	4.05e-05	0.000103199	7.37e-05	5.62e-05	9.3e-05	8.38e-05	6.21e-05	0.000100275	0.000190735	8.58e-05	7.73e-05	9.62e-05	6.98e-05	8.64e-05	8.68e-05	8.47e-05	6.67e-05	7.87e-05	8.77e-05	7.41e-05	0.000290825	6.93e-05	0.000124816	5.33e-05	7.45e-05	0.000114694	0.000140686	8.05e-05	5.29e-05	0.000293579	0.000219723
leucine	9.79e-05	1.76e-06	0.00310838	0.00706626	0.0078231	1.93e-06	2.35e-05	0.0118712	1.67e-06	1.09e-06	0.00289365	0.00282148	0.00389894	0.00356816	2.69e-05	0.0230655	2.93e-05	3.37e-06	0.00196167	0.00619641	7.32e-06	0.00158852	2.98e-06	0.00367371	3.62e-06	0.00821865	1.09e-07	0.0140749	2.41e-06	1.67e-05	1.74e-05	3.3e-06	0.00502688	0.00527811	6.91e-05	0.00503195	0.00747006	0.00710365	0.0109368	1.09e-07	3.38e-06	0.00400697	0.00399059	0.0028921	0.00419059	1.09e-07	0.00345432	1.91e-05	2.44e-05
leucine_1	0.0155068	0.000553192	0.0135689	0.000553192	0.0153018	0.0153328	0.0121324	0.0140119	0.0186318	0.020333	0.0235634	0.0150031	0.0154685	0.01437	0.0196299	0.0181358	0.0213109	0.000553192	0.000553192	0.000553192	0.013042	0.00670877	0.0229182	0.0169106	0.0128885	0.000553192	0.0153048	0.000553192	0.013905	0.0140767	0.0225905	0.0146592	0.00599527	0.0192548	0.000553192	0.00622769	0.000553192	0.000553192	0.00656407	0.000553192	0.000553192	0.012531	0.000553192	0.014159	0.0390881	0.012948	0.000553192	0.0185155	0.000553192
levoglucosan	0.0006895	0.00213367	0.00161441	0.000765466	0.000366158	0.000714939	0.000907145	0.000543023	0.00142337	6e-05	0.000927137	0.000566593	0.0017542	0.000424886	0.000380804	0.000368086	0.00051732	0.000780665	0.000396641	0.00055156	0.000958551	0.000824185	0.0009695	0.00159362	0.00108145	0.000171257	0.00117413	0.00132072	0.0016488	0.000703539	0.000613397	0.000937893	0.000762212	0.000775577	0.000478008	0.000514437	0.000738987	0.00104655	0.00283692	0.000495075	0.000759659	0.00141505	0.00134566	0.00253942	0.00154338	0.00100259	0.000659999	0.000382324	0.000336609
lysopalmitoyl monogalactosylglycerol	2.21e-05	2.81e-05	1.37e-05	3.72e-05	2.53e-05	3.33e-05	2.13e-05	2.57e-05	1.33e-05	5.41e-05	1.51e-05	1.74e-05	2.73e-05	3.29e-05	1.87e-05	1.8e-05	1.62e-05	3.7e-05	3.28e-05	1.79e-05	1.45e-05	1.53e-05	1.58e-05	1.39e-05	1.79e-05	3.54e-05	3.2e-05	9.81e-06	7.23e-06	1.59e-05	1.71e-05	2.24e-05	1.35e-05	2.42e-05	3.02e-05	1.56e-05	2.17e-05	9.93e-06	4.23e-05	2.3e-05	2.66e-05	1.69e-05	7.84e-06	9.43e-06	4.18e-05	3.79e-05	3.53e-05	1.87e-05	3.56e-05
malonic acid	0.000168857	0.000102856	0.000148568	9.22e-05	0.000175376	9.76e-05	0.000194657	0.000180004	0.000126001	0.000131874	7.31e-05	7e-05	0.000105161	0.00014635	0.000183346	0.000109198	0.000133665	0.0001055	9.66e-05	9.28e-05	0.000113626	7.75e-05	9.88e-05	0.000112952	0.000162698	7.97e-05	8.26e-05	7.86e-05	0.000124378	0.000117966	7.98e-05	0.000111109	9.42e-05	8.69e-05	0.000113308	8.49e-05	7.17e-05	9.16e-05	0.000395581	0.000144361	0.000131302	0.000131454	6.34e-05	0.000116019	0.000325102	0.000134287	0.000105519	5.96e-05	0.000126929
maltitol	5.28e-05	3.05e-05	3.44e-05	0.000208993	4e-05	0.000176565	7.24e-05	0.000255137	5.17e-05	0.000111505	0.000149202	0.000242686	6.72e-05	7.25e-05	0.000154181	0.000126989	0.00015467	3.03e-05	3.05e-05	4.11e-05	0.000128292	2.1e-05	0.000579471	2.49e-05	0.000415633	3.71e-05	0.000314468	0.000476593	0.000180583	0.000549263	0.00186141	0.00050904	0.000137754	8.46e-05	8e-05	9.24e-05	0.000269654	6.07e-05	0.00012489	5.96e-05	6.26e-05	3.19e-05	2.91e-05	4.27e-05	0.000657637	0.00087409	0.00147768	0.000377734	6.68e-05
maltose 2	0.000152761	0.000140225	0.000130413	0.00021515	0.000319736	2.77e-05	0.000110856	5.1e-07	0.00032984	0.000133319	8.47e-05	0.000130218	9.1e-05	9.79e-05	0.000222456	3.5e-05	0.000209646	0.000124573	0.000111857	1.28e-05	0.000100001	9.01e-05	0.000148065	9.6e-05	0.000129726	0.000134724	7.3e-05	0.000101661	2.53e-05	9.92e-05	0.000119494	0.000143975	9.79e-05	0.000143165	0.000135313	0.000137308	0.000117091	0.000106208	0.000225637	0.000109308	5.1e-06	0.000104432	0.000106172	0.000107911	0.000128643	3.49e-05	9.92e-05	0.000227378	0.000201719
maltotriitol	2.25e-06	2.29e-06	1.33e-06	4.22e-06	3.25e-06	3.89e-06	4.03e-06	4.95e-06	4.08e-06	4.1e-06	2.98e-06	3.33e-06	1.08e-05	3.22e-06	3.69e-06	1.06e-05	2.95e-06	2.59e-06	7.28e-06	9.7e-06	2.39e-06	8.36e-07	8.78e-06	1.29e-06	1.76e-06	2.78e-06	1.02e-05	1.32e-06	3.26e-07	1.54e-06	1.04e-05	2.11e-06	2.12e-06	2.87e-06	3.72e-06	1.1e-05	2.49e-06	4.81e-06	1.3e-05	1.33e-06	2.35e-06	1.35e-06	8.21e-07	1.45e-05	2.3e-05	3.88e-06	1.24e-05	5.73e-06	5.2e-06
maltotriose 1	3.76e-05	3.3e-05	2.84e-05	4.5e-05	2.13e-06	2.13e-06	3.2e-05	3.57e-05	3.15e-05	4.35e-05	2.13e-06	4.2e-05	2.13e-06	4.96e-05	2.13e-06	2.13e-06	2.13e-06	4.07e-05	4.21e-05	2.13e-06	2.13e-06	3.93e-05	3.35e-05	2.13e-06	3.03e-05	3.9e-05	2.13e-06	2.66e-05	2.13e-05	2.13e-06	2.13e-06	3e-05	2.13e-06	3.04e-05	3.77e-05	2.13e-06	3.12e-05	2.24e-05	0.00599566	2.81e-05	2.13e-06	2.87e-05	2.35e-05	2.78e-05	0.00473241	4.48e-05	2.13e-06	4.72e-05	2.13e-06
maltotriose 2	2.04e-05	1.97e-05	1.51e-05	3.02e-05	2.74e-05	3e-05	2.71e-05	3.5e-05	2.75e-05	2.64e-05	2.53e-05	2.68e-05	2.57e-05	2.38e-05	3.07e-05	2.6e-05	2.43e-05	2.2e-05	1.57e-05	2.37e-05	2.4e-05	1.6e-05	1.68e-05	1.68e-05	1.66e-05	1.87e-05	1.8e-05	1.1e-05	6.92e-06	1.75e-05	2.33e-05	1.58e-05	1.9e-05	2.24e-05	2.64e-05	3.03e-05	2.06e-05	1.29e-05	4.28e-05	1.36e-05	2e-05	1.29e-05	9.17e-06	1.12e-05	4.06e-05	2.3e-05	2.81e-05	3.71e-05	3.53e-05
mannonic acid NIST	0.000134763	0.00463635	0.00491872	0.00528244	0.00508105	0.00494943	0.00581802	0.00524538	0.00555029	0.00560071	0.00433485	0.00557061	0.0054342	0.000339582	0.0035591	0.000101225	0.00372262	0.00480338	0.00700701	0.00472546	0.00379979	0.00567863	0.00521733	0.00474075	0.00482021	0.000108806	0.00512343	0.00536494	0.00537721	0.00479347	0.00481795	0.00486893	0.00290589	0.00315692	0.00345103	0.00225546	4.14e-05	0.000106781	0.000293792	0.00493697	0.00485336	6.64e-05	7e-05	0.00187999	0.00532531	0.00524401	0.00115432	0.0033797	0.00337304
mannose-6-phosphate NIST	9.21e-06	6.41e-06	4.48e-06	8.09e-05	0.000237068	6.48e-06	3.54e-05	8.56e-05	4.14e-05	3.01e-05	1.29e-05	2.31e-05	5e-06	1.48e-05	0.000119098	8.39e-05	2.91e-05	6.14e-05	1.75e-05	4.47e-05	2.99e-05	5.41e-06	6.02e-05	1.2e-05	0.000128021	1.74e-05	7.12e-05	6.97e-05	3.22e-05	1.4e-05	6.4e-05	9.98e-05	2.3e-05	1.41e-05	2.45e-05	8.06e-06	3.91e-06	9.7e-06	0.000328837	3.27e-05	1.69e-08	1.12e-05	9.16e-06	1.1e-05	1.69e-08	2.03e-05	2.12e-05	0.000388304	0.00012188
melibiose minor	3.3e-05	0.000147993	7.05e-05	0.000292587	0.000153178	5.12e-05	1.77e-05	3.16e-05	9.89e-05	0.00011967	5.51e-05	0.000102655	0.000125791	4.28e-05	3.69e-05	8.69e-05	8.83e-05	4.05e-05	8.4e-05	8.33e-05	2.55e-05	7.6e-05	0.000100529	4.54e-05	6.52e-05	6.5e-05	7.98e-05	7.39e-05	8.03e-05	1.56e-05	1.51e-05	8.41e-05	6.61e-05	3.93e-05	3.19e-05	7.96e-05	7.77e-05	4.07e-05	1.51e-06	0.000115485	0.000244149	7.83e-05	4.91e-05	4.72e-05	0.000829896	9.07e-05	9.61e-05	6.8e-05	0.000288541
methanolphosphate	0.00115449	0.000747906	0.000784598	0.000800903	0.000605011	0.000634107	0.000674331	0.00100925	0.000681108	0.000807016	0.000570702	0.000778693	0.00070967	0.000970619	0.000582878	0.000519718	0.000572268	0.000594281	0.000679602	0.000650486	0.000578925	0.000618524	0.000720004	0.000611277	0.000577666	0.000780804	0.000579199	0.000639841	0.000599815	0.000709717	0.000596133	0.000509751	0.00054467	0.000578243	0.000617683	0.000594096	0.000574484	0.000636876	0.000495182	0.00121279	0.0010572	0.000790191	0.000956892	0.000906002	0.0010206	0.000648964	0.000724238	0.000444228	0.000537178
methionine	2.14e-05	0.000888214	0.00124708	1.48e-06	0.00406104	0.00130666	0.00239453	0.00260974	0.00123307	1.19e-05	0.000611587	0.000772906	0.000862194	2.61e-05	0.00337492	0.00195649	0.00348068	0.0013011	0.000426016	0.00145495	5.86e-05	0.000394344	0.00135467	0.00052472	0.00143393	0.000927482	0.000318755	0.00227212	0.00153514	6.9e-05	0.00150854	0.00248618	0.00091878	0.00110171	0.000302725	2.5e-05	0.000978746	0.00101992	0.00524145	0.00155446	3.09e-05	1.18e-05	7.38e-06	0.00101671	0.000841562	0.000941449	2.11e-05	0.00289975	0.00206554
methionine sulfoxide	0.00198912	0.0148093	0.0161932	0.0168078	0.0162547	0.0171377	0.0107739	0.012357	0.0023115	0.0171489	0.0144802	0.0194976	0.001487	0.0161829	0.0114588	0.00948529	0.000768633	0.0154251	0.0144089	0.0110122	0.00117403	0.0128641	0.0156815	0.0146366	0.016886	0.00107501	0.010457	0.0138472	0.0133587	0.00121235	0.0117798	0.0154146	0.00944139	0.0101024	0.00101869	0.00190195	0.0079682	0.00796478	0.0125027	0.0164983	0.000831376	0.0045508	0.00524881	0.00515344	0.0171756	0.000973801	0.0167816	0.0115216	0.00150179
methylamine NIST	0.0011785	0.00461959	0.0048489	0.00480037	0.0100757	0.00129268	0.00876136	0.0109819	0.00980981	0.00598941	0.00583901	0.00466813	0.00593974	0.0022673	0.0103691	0.0152765	0.0119668	0.0061069	0.00256651	0.00753237	0.00405892	0.00689351	0.00627386	0.00519221	0.00536925	0.00594551	0.00336385	0.00587171	0.0072094	0.0044668	0.00560396	0.00710045	0.00642317	0.00746671	0.00608917	0.00583679	0.00657449	0.00572392	0.00472512	0.00561229	0.00567666	0.00432907	0.00596202	0.00536092	9.92e-08	0.00497668	0.00420135	0.00934348	0.00658432
mucic acid	0.000737606	0.00207222	0.00225221	0.000849484	0.000611643	0.00167548	0.00199874	0.000229036	0.0158069	0.00299255	0.00204351	0.00355406	0.00324488	0.00395864	0.0120896	0.000939155	0.00100913	0.00286087	0.00510072	0.000287666	0.0128746	0.00576229	0.0164205	0.00823887	0.000558045	0.00103291	0.0183918	0.00621773	0.00183078	0.00171488	0.00862795	0.00166071	0.00974947	0.000326393	0.000979884	0.00851592	0.00124755	0.00971721	0.00270901	0.00161917	0.00966288	0.00622502	0.00606913	0.00607791	0.0062517	0.005322	0.00397843	0.00255079	0.00944989
myo-inositol	0.00585515	0.0056537	0.005387	0.0062767	0.0080115	0.00607989	0.00541383	0.00569496	0.0054352	0.00612692	0.00508493	0.00636874	0.00598367	0.00663514	0.00053841	0.00668462	0.00652331	0.00628702	0.00612586	0.00607028	0.00509224	0.00512493	0.00709485	0.0058575	0.00546401	0.000587976	0.00494568	0.00567288	0.00546836	0.00551712	0.00591106	0.00552686	0.0054166	0.00549195	0.00621037	0.00499081	1.29e-07	0.00424552	0.00648472	0.00609461	0.00713955	0.00382807	0.00417745	0.00432404	1.29e-07	0.00553248	0.00509889	0.00681721	0.00601845
myristic acid	0.00011414	0.000200318	0.000122442	0.000667029	0.000450686	0.000553873	0.000375107	0.000307851	5.45e-05	0.000248218	0.000261476	8.62e-05	0.000201754	0.000183316	0.0001029	0.000122668	0.00023772	0.000159434	0.000265667	0.000270219	0.00021461	0.000233957	0.000207335	0.000178588	0.000301901	0.000294987	0.000195651	0.000150743	4.74e-05	0.000121765	0.000141698	0.000345086	3.26e-05	0.000519848	0.000398656	3.99e-05	5.52e-05	0.000187194	0.000841869	0.000219634	0.000281746	7.4e-05	0.000338076	6.64e-06	0.000307324	7.68e-05	0.000175302	0.000593869	0.00047599
N-acetyl-5-hydroxytryptamine	0.0019306	7.59e-06	4.99e-06	0.000763945	0.00329921	0.0019649	4e-05	0.0136695	0.00151738	3.86e-08	0.00206881	0.00190397	2.06e-06	0.00133637	0.00120143	0.00133139	0.00415091	0.00230337	5.06e-06	0.00188204	0.00093819	0.000556992	0.001693	1.94e-05	0.00466673	0.00544005	0.000679996	1.48e-05	0.000418609	2.07e-05	0.00277245	0.00426234	0.00189625	0.00301691	0.000852602	3.51e-06	0.00145796	6.88e-05	6.89e-05	0.00132005	0.00307434	4.68e-05	3.86e-08	6.59e-05	3.86e-08	0.000716367	1.11e-06	0.00321184	1.01e-05
n-acetyl-d-hexosamine 1	0.000971207	0.000950599	0.000970673	0.000636174	0.00150959	0.00040156	0.000823089	0.00257444	0.00151332	0.00169308	0.000892519	0.000699781	0.000755249	0.000380703	0.00223276	0.000995375	0.00171764	0.000589776	0.000639499	0.00158308	0.000413982	0.00039275	0.00153803	0.000706632	0.000876006	0.000556843	0.0003499	0.00144656	0.00148562	0.00116813	0.00119379	0.00196767	0.000313447	0.0010329	0.000462135	0.000971694	0.00113504	0.000483188	0.001261	0.00118005	0.00107007	0.00076358	0.000828591	0.000322461	8.31e-05	0.00114331	0.00101639	0.00218526	0.00195379
n-acetyl-d-hexosamine 2	0.00081494	0.000591243	0.00420327	0.0197826	0.0165041	0.000525447	0.000874736	0.0155426	0.00306025	0.0190293	0.00291982	0.00334927	0.00427141	0.000708463	0.0051396	0.00475718	0.0162007	0.0186626	0.00336761	0.00356311	0.00314074	0.00220924	0.00370563	0.000378535	0.00471804	0.000623993	0.0245271	0.00144656	0.0233276	0.00320491	0.00307236	0.000674788	0.00212057	0.000377785	0.00544735	0.0021122	0.00207269	0.000643334	0.00581379	0.0052131	0.000623007	0.00232389	0.00228261	0.00225196	0.000393209	0.0170829	0.00048572	0.00101387	0.00248226
N-acetyl-D-mannosamine minor1	0.00609875	0.00253212	0.00350206	0.00636841	0.00340245	0.0206866	0.0067121	0.00705532	0.00213894	0.00715884	0.00291982	0.00334927	0.00427141	0.00641186	0.00536064	0.00475718	0.00370291	0.0186626	0.00307283	0.00356311	0.00314074	0.00220924	0.00370563	0.00273004	0.00471804	0.00435139	0.00339472	0.00197446	0.00227317	0.00326847	0.00367524	0.00286997	0.00343608	0.00249028	0.00544735	0.00329613	0.00207269	1.21e-06	0.00691562	0.0052131	0.00318644	0.00230377	0.00233772	0.00212583	0.00540403	0.00405356	0.0060538	0.00383281	0.00499385
N-acetylgalactosamine	0.00151724	0.00579268	0.00420327	0.00636841	0.00754748	0.00260405	0.0067121	0.000233554	0.00213894	0.00715884	0.00552259	0.000857681	0.00306023	0.00641186	0.00536064	0.00528469	0.00370291	0.00436664	0.00307283	0.00358807	0.0205023	0.00174313	0.00459308	0.00273004	0.00456809	0.00435139	0.00339472	0.00360976	0.00227317	0.00326847	0.00367524	0.00286997	0.00343608	0.00249028	0.000885548	0.00329613	0.00116967	0.0016042	0.00157901	0.006299	0.0122113	0.00232269	0.00228261	0.00212583	0.000386761	0.00405356	0.0013659	0.00383281	0.00248226
N-acetylglycine NIST	5.18e-06	0.000104091	5.5e-06	0.000104119	2.61e-05	8.11e-06	2.3e-05	6.94e-05	8.02e-06	1.72e-05	7.9e-06	1.81e-05	1.16e-05	1.08e-05	8.82e-06	5.48e-05	6.03e-06	2.5e-05	5.25e-06	1.33e-05	2.49e-05	3.78e-06	0.000112464	1.68e-05	8.26e-05	9.24e-06	4.89e-06	9.68e-05	1.95e-05	1.05e-05	1.41e-05	3.97e-05	2.99e-05	3.73e-05	5.62e-05	2.19e-05	8.85e-05	8.05e-05	1.27e-05	2.67e-06	7.74e-06	5.38e-06	0.00011296	0.00011433	9.59e-06	9.71e-05	4.4e-06	0.000104252	4.85e-06
N-acetylmannosamine minor	0.00047381	5.65e-05	0.000842089	0.000309347	0.00100209	0.000218389	0.000482179	0.000609397	0.000721802	0.000430183	0.000725904	0.000152322	0.00113112	0.000432712	0.00178018	0.00162488	0.00138549	0.0006793	0.000806418	0.000957271	0.000751356	0.000101025	0.000976219	0.00077614	0.00114102	4.64e-08	0.000375351	0.000785091	0.000609273	0.000755824	0.000884614	0.000371418	0.000561916	0.000879131	0.000464275	0.000429509	0.000430235	0.00025673	0.00217109	0.00139162	0.000701264	0.000532464	7.44e-05	0.000500303	0.000366362	0.000393937	0.000353149	0.00125347	0.000125042
N-acetylornithine TMS2b	4.19e-08	1.38e-05	4.19e-08	8.85e-05	0.00109665	1.14e-05	0.000240701	0.000437481	2.82e-05	2.12e-05	4.19e-08	2.01e-05	3.1e-05	4.19e-08	0.000670228	0.0010102	0.000649452	7.72e-05	4.19e-08	0.000131727	3.09e-05	3.37e-05	2.52e-05	1.05e-05	7.21e-05	2.2e-05	6.53e-05	4.19e-08	4.19e-08	4.93e-05	2.54e-05	0.000159428	1.35e-05	8.9e-05	1.88e-05	1.35e-05	4.19e-08	4.19e-08	0.00125111	4.19e-08	1.1e-05	4.19e-08	4.19e-08	4.19e-08	4.19e-08	1.14e-05	9.65e-06	0.000686876	0.000374452
N-carbamoylaspartate major	0.0192437	0.00281786	0.00203863	0.0166309	0.0181472	0.0185875	0.00329146	0.00431463	0.00253659	0.00193939	0.012105	0.0153769	0.00921693	0.0110294	0.0115863	0.0116147	0.0119261	0.00165425	0.000270397	0.0124946	0.00917018	0.00969669	0.0141661	0.00864833	0.00257791	0.00940102	0.00851789	0.01269	0.0142437	0.0098298	0.000150155	0.0126768	0.00164476	0.00725129	0.00140971	0.00684629	0.00486121	0.00155982	0.00373199	0.00728109	0.00653386	0.00214661	0.0165489	0.0175283	0.00676049	0.0133519	3.99e-06	0.012873	3.99e-06
nicotinamide	0.00209096	0.00161292	0.00473487	0.00344109	0.00201083	0.00281799	0.00273632	0.00359519	0.00140799	0.00394011	0.00178368	0.00376397	0.00204738	0.00350505	0.00262263	0.00173752	0.00164689	0.00148037	0.00407121	0.00261939	0.00227831	0.00351391	0.0018395	0.00252845	0.00250425	0.00252956	0.00178098	0.00143158	0.000851495	0.0018593	0.00183373	0.00134693	0.00289043	4.87e-07	0.0020582	0.00209027	0.00192879	0.00363437	0.00169337	7.93e-05	0.00271966	0.00246827	0.00537576	0.0019873	0.00421244	0.00356243	0.00279058	0.00316589	0.00229658
nicotinamide_1	0.00160714	0.00250197	0.00336273	0.00296231	0.00187008	0.00142076	0.00274982	0.00311196	0.00250721	0.00343453	0.00216267	0.0027687	0.00215299	0.0018328	0.00220057	0.00232554	0.00225104	0.00218292	0.00333614	0.00234292	0.00169282	0.00245392	0.00192702	0.00157113	0.00220956	0.00274387	0.00164679	0.00363918	0.00271242	0.00155013	0.00173455	0.00252234	0.00225448	0.00325966	0.00275056	0.00203784	0.00249405	0.00280156	0.00361221	0.00426527	0.00192388	0.00383242	0.00434753	0.00478104	0.00204254	0.0030916	0.00193815	0.00262847	0.0024506
N-methylalanine	0.00137145	0.00234317	0.00272171	0.00162132	0.00124325	0.00132066	0.00390647	0.00363922	0.00487027	0.00173959	0.001371	0.00118299	0.00121096	0.000542459	0.000806945	0.000752573	0.000973739	0.00340514	0.00260815	0.00306587	0.00297568	0.00323091	0.00390203	0.00128005	0.00181591	0.00191331	0.000866977	0.00171583	0.00142062	0.00142952	0.00135658	0.00237122	0.000936803	0.00111141	0.00102104	0.00131373	0.00183342	0.00204032	0.000515369	0.00202818	0.000924639	0.00251504	0.00387504	0.00307542	0.00173883	0.00131674	0.000877875	0.00121713	0.00116571
N-methylalanine_1	5.15e-05	5.15e-05	5.15e-05	5.15e-05	5.15e-05	5.15e-05	0.00390647	5.15e-05	5.15e-05	5.15e-05	5.15e-05	5.15e-05	5.15e-05	5.15e-05	0.000806945	0.000752573	0.000973739	5.15e-05	0.00260815	5.15e-05	5.15e-05	5.15e-05	5.15e-05	5.15e-05	0.00181591	5.15e-05	5.15e-05	5.15e-05	0.00142062	5.15e-05	0.00135658	5.15e-05	5.15e-05	5.15e-05	5.15e-05	5.15e-05	5.15e-05	5.15e-05	0.000515369	5.15e-05	0.000924639	5.15e-05	5.15e-05	5.15e-05	5.15e-05	5.15e-05	5.15e-05	5.15e-05	5.15e-05
noradrenaline	0.000119957	0.000122551	8.77e-05	0.000260786	0.00119184	0.000114923	0.000465915	0.00103959	0.000193018	0.00015857	7.36e-05	0.000137297	5.4e-05	0.000128916	0.000624224	0.000935011	0.000482099	0.000169441	4.94e-05	0.000199243	0.000112801	4.68e-05	0.000172103	7.02e-05	0.000185412	0.000128238	5.59e-05	0.000184879	0.000164581	7.11e-05	0.000284428	0.000439712	5.49e-05	0.000146266	9.33e-05	7.42e-05	7.24e-05	3.37e-05	0.00138687	0.000141222	0.000198149	6.72e-05	6.93e-05	6.35e-05	0.000107481	0.000143413	9.16e-05	0.000714507	0.000479433
octanol NIST	1.12e-05	6.94e-06	9.25e-06	7.93e-06	0.00061123	4.89e-06	6.68e-06	9.3e-06	1.1e-05	1.59e-05	7.49e-06	2.11e-05	5.83e-06	8.52e-06	7.44e-05	0.000364843	1.34e-05	8.26e-06	1.21e-05	5.12e-06	6.04e-06	6.74e-06	1.25e-05	0.000448962	7.08e-06	6.87e-06	4.49e-06	5.87e-06	6.62e-06	1.03e-05	9.56e-05	4.86e-06	8.77e-06	7.54e-06	0.000675193	7.92e-06	7.3e-06	0.000574518	1.26e-05	7.81e-06	9.19e-06	1.24e-05	7.15e-06	4.55e-06	2.19e-05	1.43e-05	1.21e-05	0.00117555	6.37e-05
oleamide NIST	0.0010881	0.000890691	0.000924971	0.000647247	8.02e-05	0.000431469	0.000808689	0.00209693	0.000716434	0.00100878	0.000678329	5.19e-05	0.000599464	0.00261281	3.7e-05	0.000152363	0.000638801	0.000904322	0.0016358	0.00182958	0.000942048	0.000741397	0.00116175	0.000786243	0.000793207	0.00105163	0.0003271	0.00112767	0.000720632	0.000805663	0.000181692	0.000930233	0.000399112	0.00103052	0.000637668	0.000613693	0.000776912	0.000531365	0.00180916	0.000882769	0.000484714	0.000207009	0.000437517	0.00065018	0.00408757	0.000748307	0.000418852	0.000612021	0.00179299
oleic acid	0.00108935	0.0011265	0.00119111	0.0013807	0.00319608	0.000966457	0.00370444	0.0033957	0.00269753	0.0013976	0.00106102	0.00148525	0.000880651	0.000918951	0.0020942	0.00255012	0.00156141	0.00133978	0.000991083	0.00163047	0.00110893	0.000742289	0.00135447	0.000924934	0.00191448	0.00121979	0.000862692	0.00148029	0.00170448	0.00129922	0.00188346	0.00176895	0.0017326	0.0019686	0.00183025	0.00249895	0.00209471	0.00219936	0.00211275	0.000850691	0.00087369	0.00128816	0.00138269	0.00122349	0.00116931	0.00124929	0.000856913	0.00227383	0.00170374
oleic acid_1	0.00937122	0.00934881	8.69e-05	0.00987609	0.000849675	0.000668286	0.00370444	0.0100297	0.011042	0.00923367	0.0104606	0.00148525	0.0098793	0.000198399	0.0020942	0.0114015	0.00156141	0.00762541	0.000991083	0.000865657	0.00872064	0.000474579	0.00151022	0.0103591	0.00967037	0.0111713	0.00138825	0.00839453	0.00121698	0.00976413	0.0102063	0.00871446	0.000574076	0.0019686	0.00877544	0.000694242	0.0117458	0.00220465	0.0028941	5.62e-05	0.000717502	0.0012955	0.00896579	0.00968482	0.000967354	0.00898519	0.000856913	0.00227383	0.000913338
O-phosphoserine TMS4x	7.81e-08	0.000117821	1.85e-09	0.000158478	0.000175702	0.000217153	1.77e-05	0.000328983	0.000319563	0.000263072	0.000275575	0.000269526	0.000203026	0.000193028	0.000273539	0.000261791	0.000339768	0.000278351	1.85e-09	0.000212919	0.00031305	0.000205734	0.00032849	0.000329714	0.00028169	0.00021819	0.000226378	6.99e-08	1.85e-09	0.000285626	0.000310917	0.00028778	0.000184558	0.000182406	0.000126165	0.00017517	0.000196445	9.16e-05	1.68e-06	1.85e-08	0.000124204	1.85e-09	1.85e-09	1.85e-09	1.85e-09	0.000229622	0.000225495	0.000199992	0.000327077
ornithine 3TMS	0.00076917	0.00152597	0.00146136	2.5e-07	0.000767064	0.000384967	0.00136151	2.5e-07	2.5e-07	0.00112147	0.000652095	0.000795045	0.000998516	0.00101251	0.00063217	0.00064795	0.000628642	0.00086865	0.000881318	0.000662601	2.5e-07	0.000908771	0.000631403	0.000628085	0.000927954	0.00126953	2.5e-07	0.00140913	0.000237241	0.000843862	0.000545284	0.000369072	0.000523501	0.00106657	2.5e-07	2.5e-07	0.000905158	0.00108371	7.36e-05	0.00118192	0.00088224	0.00211278	0.00184092	3.23e-05	0.000551158	0.00121042	2.5e-07	0.000906984	0.000557344
ornithine 4tms	0.0169119	0.0165386	0.0171704	0.0144735	0.0162385	0.0135347	0.0157739	0.0162549	0.0183024	0.0194581	0.0158392	0.0196688	0.0167538	0.0175358	0.018993	0.0191204	0.0193624	0.01907	0.0168474	0.0160493	0.0154436	0.0158807	0.00619029	0.0162613	0.0158772	0.00482071	0.0162367	0.0178024	0.0190255	0.0184937	0.0192057	0.0225353	0.0156144	0.0152835	0.0171428	0.0162435	0.0148279	0.0146168	0.0162619	0.00382194	0.0156498	0.0157747	0.0169693	0.0176938	0.0160488	0.017622	0.017846	0.0198914	0.0176336
orotic acid	6.06e-05	9.95e-05	8.84e-05	0.000111199	0.000105601	7.26e-07	0.000129019	9.05e-05	0.000132217	0.000141977	5.11e-07	8.16e-05	7.44e-09	8.41e-05	6.57e-05	6.3e-05	9.81e-05	6.58e-05	4.97e-05	2.46e-06	1.05e-06	3.99e-05	5.98e-05	7.44e-09	0.000152536	0.00011782	2.34e-06	7.98e-05	0.000134322	4.65e-06	6.26e-05	0.000127206	7.44e-09	8.3e-05	7.36e-05	6.3e-07	4.14e-05	6.59e-05	0.000186304	7.09e-05	2.56e-06	8.5e-05	0.000107171	0.000112854	0.000129337	0.000126754	1.08e-06	6.85e-05	6.18e-05
oxalic acid	0.000989645	0.000574421	4.07e-05	7.03e-06	6.73e-05	5.85e-05	0.00327199	0.000146927	0.000731911	0.00119536	0.000395778	2.3e-05	3.94e-05	8.08e-06	0.000446278	4.91e-05	0.00058178	1.41e-05	0.000397908	5.75e-05	3.63e-06	2.29e-06	0.000119047	7e-06	4.68e-05	3.76e-05	0.000962991	4.83e-05	0.00133681	0.000642385	9.53e-05	0.00110618	4.91e-05	4.61e-05	0.00153332	7.91e-06	0.00256109	0.00201192	0.000497532	4.19e-05	0.000677517	0.000144819	7.27e-05	0.00124192	0.00159943	2.59e-06	1.08e-05	2.38e-05	0.0034648
oxamic acid	0.00197451	0.000195999	0.00287096	0.000173356	0.00027809	0.000152156	0.000187623	0.000142913	0.00264519	0.000217931	0.000134768	9.57e-05	0.000258547	0.00325886	0.00350454	0.00351112	0.00385001	0.00213143	0.00142891	0.00409745	0.00344365	0.00196382	0.00408587	0.00431805	0.000198856	0.00396639	0.000166684	0.00304151	0.00320007	0.00405755	0.000160762	0.00283293	0.000205576	0.0032754	0.00262801	6.1e-05	6.04e-05	0.00235364	0.0027968	0.00312908	0.00458832	0.000131454	0.00281621	0.000225383	0.000317344	0.000134287	0.000169932	0.000131693	0.000179036
oxoproline	0.0275014	0.0111428	0.0173244	0.0234611	0.0185459	0.0234473	0.0238421	0.0223511	0.0239501	0.0253376	0.0202583	0.0238692	0.0267006	0.0290235	0.0203761	0.024403	0.0191779	0.0266954	0.0325832	0.020971	0.0237206	0.0243772	0.0270102	0.0265397	0.0237253	0.0224254	0.0320805	0.0232938	0.0220197	0.0261402	0.0267566	0.02862	0.0323559	0.0306954	0.0260084	0.0315765	0.0226348	0.0312568	0.0279595	0.0283338	0.029407	0.0334572	0.0146854	0.035425	0.0342553	0.0211084	0.0295021	0.0162364	0.0158091
oxoproline_1	0.0275019	0.000162892	0.0277098	0.000161999	0.000235164	0.000145622	0.0238432	0.000348789	0.000217379	0.000331791	0.000176339	0.000165048	0.0295236	0.000181802	0.0203761	0.000257596	0.000229148	0.000150011	0.000209987	0.000186664	0.0230983	0.000158274	0.0270114	0.0275261	0.0237268	0.0318816	0.000256899	0.000316663	0.000454188	0.0261402	0.0236896	0.000219072	0.00019117	0.00016998	0.000282902	0.000149632	0.0297966	0.0312568	0.0118973	0.0292447	0.000372633	0.000226096	0.00018166	0.035425	0.0342553	0.000155888	0.0270866	0.0162374	0.000168946
palatinitol	0.000347494	0.000312686	0.000467505	0.000450176	0.000581534	0.000404867	1.09e-05	0.000720919	0.00110535	0.000118748	0.000787346	0.000791619	3.63e-05	0.000290503	0.000154181	0.000126989	0.00180482	0.000529922	0.000442522	0.00417934	0.000453276	0.000332219	4.53e-05	0.000512499	0.000415633	0.000675266	9.99e-05	0.000211144	4.57e-05	0.00056543	0.000592454	0.000522039	0.00321805	0.000302871	0.000479186	9.24e-05	0.000269654	0.000317208	0.000786512	0.000205132	0.0001052	3.19e-05	0.000262375	0.000263037	8.69e-05	9.85e-05	0.000330286	6.67e-05	0.00077879
palmitic acid	0.00701116	0.00051377	0.00708433	0.00850579	0.00913421	0.00724362	0.00884756	0.00840778	0.00858521	0.00168839	0.00810716	0.00778129	0.0080253	0.00759158	0.00853313	0.00837571	0.00915101	0.00148394	0.000875828	0.00762625	0.00134357	0.000616446	0.0102956	5.34e-05	0.0071099	0.00878569	0.00866283	0.00140753	0.00809387	0.00103984	0.00862795	0.0073795	0.0100966	0.00105158	0.0102168	0.00851592	0.00931609	0.000315499	0.00929746	0.00726035	0.000563963	0.00457427	0.00606913	0.000243547	0.00966403	0.00786494	0.00749278	0.00897447	0.00944989
palmitic acid_1	1.83e-05	5.04e-05	2.7e-05	6.67e-05	4.91e-05	4.65e-05	2.15e-07	6.06e-05	2.15e-07	8.01e-05	6.31e-05	4.73e-05	4.62e-05	1.13e-05	4e-05	2.15e-07	4.37e-05	4.8e-05	2.15e-07	5.96e-05	4.18e-05	3.83e-05	6.14e-05	3.66e-05	8.91e-06	6.91e-05	4.81e-05	2.15e-07	2.15e-07	4.81e-05	4.14e-05	2.15e-07	2.48e-05	2.15e-07	2.15e-07	4.31e-05	5.91e-05	9.36e-06	5.86e-05	2.55e-05	3.28e-05	2.15e-07	2.15e-07	2.15e-07	2.15e-07	6.6e-05	5.67e-05	5.67e-05	5.67e-05
pelargonic acid	0.00229141	0.00111206	0.00101774	0.00114279	0.000116538	0.00099152	7.34e-05	0.00192507	8.99e-05	0.00293766	0.00186435	0.0014907	0.00112335	5.4e-05	0.00226092	5.04e-05	0.000842087	9.69e-05	0.00264339	3.98e-05	0.00153027	0.000101408	1.13e-05	4.82e-05	2.33e-05	0.000116741	7.69e-05	0.00341657	7.32e-05	0.00322119	4.24e-05	0.0024163	9.54e-05	6.81e-05	0.000121219	7.97e-05	7.49e-05	2.58e-05	0.00142368	0.00245213	0.00286079	0.00083323	0.000449427	7.46e-05	0.00102496	8.95e-05	0.000969038	3.77e-05	0.00236319
pentadecanoic acid	0.000356603	0.000272018	0.000325008	0.000421948	3.8e-05	0.000385899	0.000381592	3.17e-05	0.000366227	0.00017893	0.000221244	0.00035514	0.000449006	0.000553067	0.00019707	5.34e-05	0.000469491	0.000325337	0.000141204	0.00043292	0.000190452	0.000472446	0.000243423	0.000218055	0.000169941	0.000363878	9.52e-05	2.14e-05	0.000468355	0.000163934	0.000449378	0.000536666	0.000146096	0.0019167	0.000156528	0.000161003	0.00010332	0.00213407	0.000280684	0.000225549	0.00027595	0.000216515	0.000301592	0.000314383	0.000237461	0.000106716	0.000461603	0.000616186	0.000538451
phenylalanine	0.00487572	0.00650491	0.00646827	0.00777765	0.0148524	0.00613859	0.012079	0.0129728	0.00706048	0.00422939	0.00295008	0.00390712	0.00535931	0.00647957	0.0121618	0.0145746	0.0127912	0.00829389	0.00291603	0.00639424	0.00557669	0.00358379	0.00728536	0.0041661	0.00824762	0.00772633	0.00403734	0.0140899	0.00829635	0.00382739	0.00675017	0.0138544	0.00391569	0.00701419	0.00424152	0.00406963	0.00684829	0.00657116	0.0143382	0.00782502	0.00758857	0.00577897	0.00588516	0.00710768	0.00611726	0.00569971	0.0038945	0.0125548	0.00901077
phenylalanine minor	0.000117415	1.67e-05	2.88e-05	6.9e-05	0.000195488	2.87e-05	3.98e-05	9.53e-05	1.09e-05	2.73e-05	1.21e-05	5.07e-05	1.88e-05	0.000130663	8.27e-05	0.000103321	3.53e-05	4.91e-05	9.51e-06	4.75e-05	3.86e-05	1.04e-05	5.42e-05	2.39e-05	3.42e-05	8.23e-06	8.57e-06	6.01e-05	4.32e-05	1.28e-05	5.88e-05	5.71e-05	2.55e-05	1.23e-05	2.27e-05	3.75e-05	1.44e-05	3.15e-05	0.000466124	3.79e-05	0.000144855	2.09e-05	1.4e-05	2.08e-05	1.69e-05	9.04e-06	4.58e-05	9.26e-05	7.52e-05
phosphate	0.0383811	0.0238376	0.0246468	0.0237922	0.0224529	0.0289554	0.02177	0.0201201	0.0230596	0.0248552	0.0284015	0.0299591	0.00269009	0.0316922	0.0243448	0.0240858	0.0269978	0.0263515	0.0458566	0.000525471	0.0245179	0.00243987	0.0291883	0.000585571	0.000615178	0.0275129	0.0296163	0.0293341	0.0266428	0.0291244	0.0276495	0.0254451	0.0274097	0.0228775	0.0262877	0.0028641	0.0240309	0.0212467	0.0197695	0.0362804	0.0328856	0.0233091	0.0359001	0.0295696	0.000393404	0.0246496	0.0286157	0.0249476	0.000538988
phosphate_1	0.0164331	0.0167695	0.017655	0.000615124	0.000615124	0.000615124	0.000615124	0.0138463	0.000615124	0.000615124	0.000615124	0.000615124	0.0187555	0.000615124	0.000615124	0.000615124	0.000615124	0.000615124	0.00992787	0.000615124	0.0147935	0.00901193	0.000615124	0.000615124	0.0129604	0.000615124	0.00897908	0.0109073	0.0186573	0.000615124	0.0134863	0.000615124	0.000615124	0.000615124	0.000615124	0.000615124	0.000615124	0.000615124	0.0155402	0.0114424	0.022135	0.0136201	0.0115884	0.000615124	0.000615124	0.0159523	0.000615124	0.000615124	0.000615124
phosphate_2	0.00189452	0.00165338	0.00158839	0.00146724	0.00101177	0.00229453	0.00147659	0.00141237	0.00150896	0.00169182	0.00133389	0.00164157	3.68e-08	3.68e-08	0.00415095	0.00400149	0.00199936	0.00151009	0.00131543	0.00143311	0.00194979	0.00207038	0.00183199	0.00254726	0.000960518	0.00200889	0.00240043	0.00190874	0.00193453	0.00234583	0.00118809	0.000847653	0.00237589	0.00149538	0.00182027	3.68e-08	0.00387911	0.00151245	0.00394227	3.68e-08	0.00150902	0.00233894	0.000994852	0.00173179	6.09e-06	0.00141678	0.00114653	0.00158974	0.0018926
phosphate largeDELTA RI	0.0171204	0.0146253	0.0212267	0.00858688	0.0165988	0.0215757	0.0166305	0.0156747	0.019318	0.00836034	0.0206146	0.0142444	0.0243417	0.0272745	0.016601	0.0178267	0.0200686	0.0195817	0.000484784	0.0230247	0.018987	0.000484784	0.00565637	0.0239799	0.0181645	0.0234261	0.024957	0.0219496	0.0216513	0.0222822	0.018788	0.019284	0.022852	0.00781742	0.0198036	0.0238236	0.0184857	0.016991	0.00691727	0.0167882	0.0224913	0.0380214	0.00795443	0.0209305	0.0233529	0.00868899	0.0217083	0.00484784	0.0203698
phosphoenolpyruvate	0.00683899	0.00596755	0.00631404	0.00266839	0.00534729	0.0104072	0.00988856	0.010625	0.0117147	0.0108095	0.0127307	0.0126675	0.0130516	0.0134353	0.00800184	0.00387635	0.00903587	0.00988236	0.0114977	0.0106941	0.00974813	0.0112448	0.0114567	0.0129393	0.00764343	0.00844543	0.0149504	0.0127271	0.0106781	0.0142932	0.0115364	0.00848408	0.0133029	0.00894032	0.0104051	0.0129454	0.0110222	0.0089341	0.00666277	0.00416347	0.00661059	0.00807705	0.00803941	0.00805204	0.00425965	0.00929971	0.0119263	0.00713475	0.007601
phosphoethanolamine	0.00662021	0.00401467	0.00463388	0.00765797	0.0111947	0.006208	0.0071473	0.00829954	0.00364188	0.00711723	0.00586084	0.00686079	0.00568564	0.00872149	0.00751507	0.00884342	0.00635767	0.00727184	0.00589068	0.00839198	0.00721176	0.00518761	0.0055077	0.0039163	0.00639167	0.00601051	0.00547301	0.00716214	0.00361286	0.00464334	0.00756649	0.00801542	0.00411387	0.00548354	0.00521891	0.00707145	0.0057973	0.00260696	0.00862262	0.00514421	0.00651838	0.00417906	0.00257766	0.00256665	0.00189113	0.00561211	0.00573955	0.0100672	0.00937548
phosphohexonic acid	0.000103313	6.3e-05	5.5e-05	0.000199335	0.00083768	6.56e-05	0.000201619	0.000373216	0.000212919	0.000184281	7.42e-05	0.0001136	5.58e-05	5.69e-05	0.000181254	0.00044345	0.000205859	0.000204017	7.68e-05	9.59e-05	8.82e-05	1.73e-08	0.000204863	7.48e-05	9.96e-05	0.000159759	0.000136524	0.000197681	0.000228761	0.000164251	0.000131564	0.000238224	8.56e-05	0.000122545	0.000134673	8.24e-05	0.000156667	7.34e-05	1.73e-08	4.82e-05	5.16e-05	0.000126857	0.000131	0.000135452	0.000247501	0.000146372	6.36e-05	0.000238215	0.000217087
phthalic acid	0.000388684	0.000144959	0.000903873	0.00045325	0.000151604	0.000673111	0.000235589	0.000402421	0.000402959	0.000452126	0.000407402	0.000352868	0.000631434	0.000309867	8.01e-05	0.000105319	8.35e-05	0.000350922	0.000293355	0.000764107	0.000644104	0.000626714	4.24e-05	0.000390912	0.000114961	0.00043636	0.000247024	0.000486619	0.000499787	0.000664327	0.000569123	0.000599761	0.000752975	2.1e-05	3.72e-05	0.000674092	0.000423354	0.000590362	0.000999311	0.00039383	0.000756786	0.000401947	0.000471475	0.0008343	5.58e-05	0.000511884	0.000794567	0.000295083	0.00063308
p-hydroxylphenyllactic acid	0.00046374	0.000724476	0.000492326	0.000761053	3.82e-05	3.04e-05	3.29e-05	0.000542822	0.000615693	1.92e-05	1.44e-05	0.000401426	0.000569753	2.8e-05	2.93e-05	0.000834721	0.000173608	0.000525979	0.000461842	2.08e-05	0.00040382	0.00055493	0.000559989	2.05e-05	2.05e-05	0.000473176	0.000292804	0.0003358	1.29e-05	0.000433383	0.000460852	3.04e-05	0.000424019	0.000400818	1.77e-05	1.83e-05	0.000337338	1.86e-05	0.000356861	0.000217408	1.65e-05	0.000347683	0.000371807	0.000420174	0.000921825	0.000486085	0.000412192	3.04e-05	0.00041049
pipecolic acid	0.000378765	0.000361722	0.000360574	0.000389353	0.000252307	0.000354459	0.000182522	0.000256516	0.000249199	0.000292573	0.000243374	0.000281303	0.000284288	0.000232158	0.000177881	0.000144577	0.000188295	0.000271833	0.000137062	0.000227035	0.000232299	0.000264324	0.000310902	0.000231399	0.000136606	0.00025166	0.000216251	0.000267787	0.000235267	0.00025893	0.000240301	0.000232171	0.000852323	0.00093608	0.000903096	0.000395536	0.000397537	0.000476579	7.39e-05	0.000169918	0.000144978	0.000125792	0.000206511	0.000160553	0.000370903	0.000289096	0.000262726	0.000179413	0.000196032
proline	1.05e-05	0.0297218	0.0271884	1.05e-05	5.22e-05	3.88e-05	3.44e-05	0.024848	3.34e-05	7.43e-06	0.0350463	1.29e-05	0.0284501	0.0261519	4.24e-05	0.0332408	4.38e-05	3.23e-05	0.0343363	0.0347901	2.77e-05	2.58e-05	3.09e-05	0.024809	0.0238444	3.18e-05	2.96e-05	2.97e-05	3.27e-05	0.0266961	4.26e-05	3.9e-05	0.000284652	3.52e-05	2.89e-05	1.2e-05	0.0250374	8.13e-06	0.0131709	0.0297777	7.94e-06	0.0240142	1.06e-05	2.58e-05	0.0271435	0.0275035	1.63e-05	4.03e-05	0.0277532
pseudo uridine	0.00106171	0.00106507	0.000923143	0.000701233	0.000483163	0.000646707	0.000548134	0.000357136	0.000756189	0.00103743	0.000929608	0.00099076	0.000876181	0.000767973	0.000588874	0.000539246	0.000713743	0.00138218	0.00132253	0.00103912	0.00136993	0.00113115	0.00085917	0.00133094	0.000727666	0.000908734	0.00105213	0.000993128	0.000931783	0.00130434	0.0010858	0.000742202	0.000512883	0.000764129	0.000862218	0.000858286	0.000629	0.000635999	0.00115178	0.00101116	0.000858442	0.000613723	0.00101252	0.000818118	0.000688698	0.000631787	0.00089468	0.000571079	0.000990803
putrescine +CO2	0.000110762	0.00015066	0.000122442	0.000230782	0.000179047	0.000187439	0.000104159	8.87e-05	8.02e-05	6.81e-05	0.000162927	4.22e-05	0.000111122	0.000165818	0.000153605	9.29e-05	0.000125278	0.000163371	7.6e-05	0.000144181	0.000169559	5.84e-06	0.000212653	7.63e-05	0.000302466	0.000288579	0.000156055	7.46e-05	5.53e-05	0.000121765	0.000104955	0.000345086	3.26e-05	5.38e-05	3.23e-05	3.81e-05	5.47e-05	7.7e-05	0.000776942	8.47e-05	0.000145489	4.17e-05	5.12e-05	4.95e-05	0.000501542	7.66e-05	0.00016472	0.000149237	0.000127299
pyrophosphate meox2	0.019679	0.0232914	0.0175244	0.0190116	0.00301052	0.0223748	0.0132002	0.00816931	0.0223	0.0248472	0.0277438	0.0264089	0.033215	0.0247733	0.00355951	0.00179811	0.00310238	0.0227238	0.0268735	0.025841	0.0183545	0.0314632	0.0193172	0.0282775	0.0170172	0.0239998	0.0299933	0.0217115	0.024304	0.0313029	0.0177854	0.00882223	0.0280442	0.0213077	0.0263889	0.0304181	0.0262539	0.0194508	0.00218528	0.018718	0.0185434	0.0259721	0.022701	0.0284461	0.0161587	0.0193301	0.0281157	0.00360069	0.0036659
pyrophosphate TMS4	2.5e-09	0.0106607	0.0123427	2.5e-09	0.000453336	0.00861425	0.00475921	2.5e-09	0.0119633	2.5e-08	0.0101026	2.5e-09	0.0116988	0.0125763	0.000331887	0.000609793	0.000320747	2.5e-09	2.5e-09	0.00591709	0.00509931	2.5e-09	2.5e-09	0.0132673	0.00546724	2.5e-09	0.0124198	0.00831894	0.0147326	0.00570865	0.00423529	2.45e-05	0.015628	2.5e-09	0.0114597	0.00934258	0.0106123	0.0128803	2.5e-09	2.5e-09	0.00563906	0.00761951	2.5e-09	0.00695129	2.5e-09	0.00802012	0.0111013	2.5e-09	0.000721754
pyrophosphate1	0.0162734	0.0232914	0.0218254	0.0190116	0.00301052	0.0223757	0.0132007	0.000282804	7.15e-05	0.0248472	0.027745	3.26e-06	8.48e-05	0.0247749	0.00355951	0.00179811	0.00310238	0.00358772	0.0268129	0.00551042	0.0183545	0.0314632	0.000175568	0.000323716	0.0170172	6.15e-05	0.0299948	0.0217115	0.000174821	0.0313049	0.0177854	0.00882223	0.0280453	0.0213077	1.74e-05	0.0304192	0.0262539	0.0194508	0.00218528	0.018718	0.0185441	8.25e-05	0.000433511	0.00063021	0.0161587	0.0171047	5.34e-05	0.00360069	0.0036659
quinic acid	1.59e-08	0.00156933	1.59e-08	0.000162012	0.000113665	0.000135169	0.000120219	9.85e-05	0.0010295	0.00159006	0.00107711	0.000237597	0.000937532	0.000166105	0.00275205	0.000408243	0.00284334	4.93e-05	1.59e-08	0.00220269	5.21e-05	0.000383142	6.8e-05	0.000458478	1.59e-08	7.63e-05	4.58e-05	1.59e-08	1.59e-08	0.000356365	0.000350271	3.09e-05	0.000458243	0.000504375	7.47e-05	0.000754875	0.000726676	0.000724999	1.59e-07	1.59e-08	7.68e-06	1.59e-08	1.59e-08	1.59e-08	1.59e-08	1.59e-08	3.45e-07	0.000670326	0.000664199
quinic acid_1	0.00850349	0.00855098	0.00525824	0.00767095	0.00539503	0.00614232	0.00494234	0.0055543	0.00560705	0.00876345	0.00635153	0.00515757	0.00535047	0.00616655	0.00993165	0.00818891	0.0094335	0.00414718	0.0120606	0.00856546	0.000659276	0.00982192	0.00117532	0.00431521	0.00534057	0.00494824	0.00305812	0.00397129	0.00106517	0.00350198	0.00359155	0.004481	0.00483809	0.00514075	0.0056933	0.00519179	0.00470306	0.00525785	0.00309037	0.000630224	0.00227661	0.00342371	0.00374938	0.00422763	0.00104945	0.00481378	0.00420925	0.00423514	0.00391172
quinic acid_2	5.95e-09	0.00156933	0.00118972	0.00116453	0.000704739	0.000597912	2.32e-05	0.000937887	0.0010295	0.00159006	0.000866886	0.00139911	0.000937532	0.0010821	0.00275205	0.00225489	0.000460877	0.00032703	5.95e-09	0.000476179	0.000264418	0.0026854	0.000340659	1.17e-05	0.000487536	0.000546331	0.000215891	5.95e-09	5.95e-09	0.000356365	0.0003366	5.2e-05	0.000328578	0.000504375	0.000536489	0.000396786	0.000726676	0.000781551	1.98e-07	5.95e-09	1.75e-07	2.18e-05	4.92e-06	2.94e-05	9.57e-06	9.19e-05	7.92e-05	0.000670326	0.000582225
raffinose	1.94e-06	2.54e-06	7.52e-07	1.66e-06	2.6e-06	2.56e-06	1.9e-06	5.44e-08	1.8e-06	6.73e-07	1.76e-06	2.08e-06	4.02e-06	1.78e-06	3.72e-06	3.84e-06	3.58e-06	2.04e-06	1.84e-06	1.47e-06	6.92e-07	2.06e-06	1.58e-06	1.99e-06	1.43e-06	6.39e-07	1.55e-06	8.8e-07	7.39e-07	5.61e-07	1.06e-06	1.85e-06	3.01e-06	1.17e-06	1.71e-06	3.28e-06	6.21e-06	1.48e-06	5.44e-08	1.84e-06	2.75e-06	2.67e-06	1.4e-06	7.03e-07	1.57e-05	1.82e-06	3.02e-06	3.79e-06	3.04e-06
ribitol	0.000379571	0.000514077	0.00058409	0.000501849	0.000280131	0.000393104	0.000362154	0.000326173	0.000383406	0.000625741	0.00047069	3.9e-05	0.000554695	0.000609531	4.98e-05	0.000245605	2.03e-05	0.000357982	0.000370047	0.00033805	0.000326702	0.000393232	0.00038529	0.000410543	0.000448016	0.000466669	0.000126183	0.000432196	0.000161406	0.000406791	0.000316393	0.000431356	0.000178189	0.000149518	2.2e-05	0.000767267	0.000231085	0.000895954	0.000400299	0.000338758	0.000384899	0.00038261	0.000320392	0.000488254	9.69e-05	0.0005402	0.000440137	0.000284564	0.000262687
ribitol_1	0.017569	0.0183169	0.0201736	0.015621	0.000651125	0.000697412	0.0137071	0.00157376	0.00115852	0.00274655	0.00160067	0.0113661	0.0148134	0.0020056	0.00104603	0.000732763	0.00813257	0.0144563	0.0153648	0.00145927	0.00999769	0.022054	0.00951615	0.00524803	0.00155905	0.00116142	0.0124394	0.00846037	0.0110864	0.00174912	0.00788641	0.00136911	0.00321732	0.00412838	0.0153048	0.0119258	0.00280518	0.00297336	0.0030602	0.00106581	0.01948	0.0181708	0.0018708	0.0223216	0.00737662	0.0184142	0.0151967	0.000881027	0.00100409
ribonic acid RI 597646	0.000776159	0.00128358	0.00115405	0.000749835	0.000776997	0.000968744	0.00101918	0.00111227	0.00131185	0.0021361	0.000716189	0.0010734	0.000769382	0.000983176	0.000735786	0.00236486	0.00053608	0.000646332	0.000379878	0.000846187	0.00205267	0.000455253	7.78e-05	0.000969717	0.000767315	0.00299886	0.000372341	0.000456653	0.000488469	0.000357646	0.000463111	0.00098012	0.00114967	0.000474512	0.00100397	0.000882356	0.000674762	0.000862287	0.000620123	0.0002733	0.00107557	0.000480573	0.000498553	0.00160539	7.81e-05	0.00045953	0.000998757	0.000517735	0.00222031
ribonic acid RI 599680	0.00205381	0.0043066	0.00268981	0.00350425	0.00202151	0.00330477	0.00442645	0.00462034	0.00155818	0.0020427	0.00136016	0.00431529	0.00146252	0.00373576	0.000972312	0.00542491	0.000979302	0.00160666	0.00144555	0.00105283	0.00223844	0.00100568	0.00306065	0.00204813	0.00156689	0.00175597	0.000968447	0.00132831	0.00122269	0.00124577	0.00126679	0.00205879	0.00315185	0.00471919	0.003858	0.00149848	0.00166128	0.00165578	0.00276946	0.00310328	0.00356287	0.00151224	0.00191326	0.00107583	0.00205065	0.00241345	0.00313453	0.00111274	0.000990113
ribose-5-phosphate	0.000971207	0.000950599	0.000970673	0.00193915	0.00448286	0.00111014	0.00171617	0.00257444	0.00151332	0.0017189	0.000892519	0.00139466	0.000755249	0.000911122	0.00223276	0.00295233	0.00171764	0.00126342	0.000639499	0.00158308	0.000972754	0.00039275	0.00153803	0.000706632	0.0013706	0.00143706	0.000919284	0.00144656	0.00148562	0.00116813	0.00119379	0.00196767	0.000800518	0.0010329	0.00091473	0.000971694	0.00113504	0.00100364	0.00395367	0.00118005	0.000303446	0.00076358	0.000828591	0.000784374	0.000932694	0.00114331	0.00101639	0.00218526	0.00195379
ribulose-5-phosphate	0.00081494	0.000591243	0.000588534	0.000843304	0.00143828	0.000525447	0.000874736	0.00125399	0.00151332	0.00081047	0.000892519	0.000783043	0.000755249	0.000662905	0.000823079	0.000927582	0.00171764	0.00126342	0.000639499	0.000622579	7.41e-06	0.000290085	0.000759725	0.000706632	0.000708382	0.000556843	0.00048043	0.000814973	0.00089181	0.00116813	0.00120231	0.000858251	0.000800518	0.000488647	0.00091473	0.000558046	0.000614073	0.000643334	0.00125878	0.00118005	0.00107007	0.00037391	0.000420295	0.000427663	0.000157099	0.00040897	0.00048572	0.000879997	0.000678024
sarcosine	7.36e-05	0.000492627	0.000477719	6.46e-05	7.21e-05	9.09e-05	2.12e-05	6.52e-05	0.000226371	8.75e-05	3.35e-06	6.6e-05	0.000203669	4.55e-05	6.63e-05	6.93e-05	2.09e-05	0.000159496	5.01e-05	0.000170449	0.000111659	0.000193248	0.000189891	0.000132845	3.54e-06	0.000273746	8.64e-05	0.00033004	0.000282649	0.000142578	0.000127452	0.00038581	0.00017243	0.000294504	0.00012687	3.73e-06	0.000391224	2.41e-05	2.08e-05	0.00025682	1.58e-05	0.000151225	5.75e-05	0.000366831	0.0379486	0.000126662	2.49e-06	0.000138341	0.00012204
serine	3.65e-05	1.21e-05	1.83e-05	1.28e-05	2.13e-07	8.39e-06	2.13e-07	2.13e-07	1.65e-05	2.13e-07	2.13e-06	2.13e-07	2.13e-07	2.49e-05	2.13e-07	2.13e-07	2.13e-07	1.46e-05	2.13e-07	1.23e-05	1.22e-05	2.13e-07	2.13e-07	4.27e-06	1.22e-05	2.13e-07	3.25e-06	1.38e-05	1.85e-05	7.04e-06	2.13e-07	3.74e-06	7.48e-06	1.04e-05	2.13e-07	2.13e-07	8.86e-06	2.13e-07	2.13e-07	2.53e-05	1.75e-05	2.72e-05	4.27e-05	2.59e-05	2.13e-07	1.27e-05	2.13e-07	2.13e-07	2.13e-07
serine minor	0.00388237	0.000310016	0.00191382	0.00101462	0.000583137	0.000254936	0.000505025	0.0013271	0.000300262	0.000725261	0.00318718	0.000223639	0.000662421	0.00451555	0.000847198	0.000981198	0.00023355	0.000678458	0.00220886	0.000723458	0.000706918	0.00431539	0.000716779	0.000388352	0.000317099	0.000268704	0.00141259	0.000286958	0.000281761	0.000445815	0.000898064	0.000236096	0.000807089	0.000248307	0.000563114	0.000750208	0.0269445	0.000282	0.00544297	0.000235134	0.00171949	0.000345681	0.000522544	0.000342454	0.000393404	0.00226752	0.00104967	0.00114811	0.0010677
serine minor_1	4.7e-06	0.00383541	9.12e-05	0.00330662	2.28e-05	8.08e-06	0.00350387	2.14e-05	3.08e-05	5.95e-06	9.71e-05	0.00317094	1.55e-05	5.8e-05	0.00293997	0.00222672	2.8e-05	0.00376808	0.000132257	8.8e-05	0.00348277	1.9e-05	0.00389171	0.00010769	2.62e-05	0.00376977	8.51e-05	0.00486363	9.34e-05	8.77e-05	0.00308044	2.6e-05	2.73e-05	9.04e-05	5.31e-05	0.000701186	0.00074356	0.00114332	2.64e-05	0.00368605	4.42e-06	0.00435793	0.00345141	3.46e-05	1.16e-05	0.0030314	9.38e-05	0.00329045	1.44e-05
serotonin	0.000384886	0.000368839	0.00037985	0.00065207	0.000258852	0.000525075	0.000319161	0.000295136	0.000473738	0.000503856	0.000354444	0.000480308	0.000497924	0.000462336	0.000285428	0.000225793	0.000258979	0.000446957	0.000451027	0.000329857	0.000388946	0.000360082	0.000562932	0.000504918	0.0003448	0.000431294	0.000347192	0.000375684	0.00033675	0.000465122	0.000425914	0.000324396	0.000283577	0.000332036	0.000322674	0.000268137	0.000275547	0.000236046	0.000415712	0.000398281	0.000291916	0.000375952	0.000360738	0.000395992	0.000334565	0.000516188	0.00053768	0.000322277	3.49e-05
sophorose	1.14e-06	0.00108693	0.000420701	0.00240015	0.00170676	0.000129861	0.000948722	0.00109549	0.000582168	0.000605053	0.000455901	0.000475244	0.000630075	0.00065036	0.000808737	9.08e-05	0.000117909	0.000358437	1.14e-05	0.00043207	0.000376256	0.000360884	0.000163866	0.00128714	0.000163021	0.000391732	0.000405113	0.00034483	0.00117718	0.000189542	0.000420138	0.000167518	0.000643335	0.0016898	0.000683177	0.000538974	0.000437634	0.000451803	0.00042686	0.00145273	9.59e-05	1.64e-05	0.000519311	4.35e-05	0.00108493	0.00105188	0.000559816	0.000124615	0.00197958
sophorose minor1	0.00010869	0.000112063	9.91e-05	0.000359234	6.46e-05	0.000280858	0.000109982	0.000147335	0.000124575	0.00012671	9.97e-05	0.00011592	0.000137343	2.67e-05	0.0001636	0.000149896	0.000170228	8.65e-05	0.000104097	2.12e-05	8.33e-05	8.92e-05	0.000117968	9.16e-05	8.73e-05	9.24e-05	8.28e-05	7.5e-05	7.52e-05	9.06e-05	8.91e-05	7.31e-05	0.000119894	0.000133087	0.000142909	0.000113902	9.36e-05	9.62e-05	5.46e-05	0.000119933	0.000143475	8.47e-05	9.02e-05	9.24e-05	0.000168805	0.000119299	0.000117131	8.47e-05	9.15e-05
sorbitol	0.00414818	0.00347576	0.00392316	0.0163878	0.0178644	0.0037695	0.00462885	0.00569103	0.0043747	0.00410809	0.00286351	0.00405325	0.00501876	0.00566351	0.00510458	0.00438676	0.00583362	0.00348221	0.00764485	0.00586686	0.00209622	0.00959278	0.00354856	0.00248848	0.00382338	0.00346392	0.00379775	0.00567891	0.00471249	0.00330241	0.00437433	0.00515462	0.0180656	0.0151147	0.0173961	0.0178739	0.0159715	0.0182118	0.00394953	0.00234808	0.00232267	0.00240705	0.00303574	0.00328362	0.00857331	0.00530261	0.00418715	0.00563176	0.00491801
spermine major	0.00059771	8.52e-05	9.42e-05	7.27e-05	0.00107091	0.000964143	0.000497304	3.86e-05	0.000256157	0.000181914	0.000195237	0.000219216	0.000183349	0.000634461	6.1e-05	0.00101952	1.49e-07	0.000103286	0.000139986	0.000259377	8.9e-05	0.000224809	0.000131269	0.000115991	0.000113154	0.00167934	0.00141138	0.000107832	7.78e-05	0.000135337	0.000125441	8.84e-05	0.000138899	0.000114102	8.21e-05	0.000177501	0.000172896	0.000112233	0.00262185	0.000147852	1.49e-07	9.12e-05	6.73e-05	8.7e-05	0.00311568	0.000115563	0.00122286	0.000604732	0.00107781
stearic acid	0.00540707	0.00557476	6.99e-05	0.00709176	0.0081405	0.00594684	0.00456857	0.00664546	0.00013666	0.00810995	0.00743664	0.00633239	0.00615577	0.00635816	0.00783103	0.0068152	0.00680237	0.00504784	0.0040625	0.00658223	0.00509755	0.00438418	0.00865132	0.00743089	0.00571461	0.00855945	0.00682136	0.00401892	0.000148595	0.00645166	0.000115457	0.00430839	0.00789264	0.00771461	0.00695509	6.15e-05	0.00666577	0.00397828	0.00669753	0.00439652	0.00637162	0.00305129	0.00412277	9.1e-05	0.00841581	0.00678175	0.00667246	0.00656392	0.00660645
stigmasterol	8.62e-06	6.25e-06	1.07e-05	2.28e-05	2.2e-05	1.32e-05	5.3e-06	6.98e-06	5.24e-06	8.03e-06	2.79e-05	2.58e-05	7.1e-06	8.04e-06	1.19e-05	1.33e-05	1.24e-05	8.57e-06	1.21e-05	1.19e-05	9.1e-09	1.01e-05	3.69e-05	1.14e-05	9.03e-06	9.79e-06	3.31e-05	9.25e-06	9.17e-06	1e-05	9.76e-06	1.01e-05	1.47e-05	9.98e-06	9.98e-06	9.76e-06	1.03e-05	5.83e-06	1.04e-05	7.18e-06	9.51e-06	3.98e-06	4.37e-06	2.94e-07	3.13e-05	6e-06	8.53e-06	1.07e-05	9.89e-06
succinic acid	4.19e-05	0.00789097	6.39e-05	0.00256523	0.00812118	0.00863889	0.00734444	0.00127277	0.00835249	0.00879028	0.00920026	0.00315363	5.64e-05	0.00857498	0.00246097	0.0083317	0.00288978	0.00824396	0.000330574	0.00953291	0.000580465	0.00907777	0.00928966	0.00210324	2.02e-05	0.00860719	0.00817839	0.00248828	0.00825198	6.83e-05	0.00883123	0.00806266	5.45e-05	0.00791381	0.00840679	6.41e-05	0.00728331	0.00699883	0.00668981	0.00927844	0.0109631	0.00766398	0.00922984	0.00875225	0.00441764	1.6e-05	6.52e-05	0.00828436	0.00247966
sucrose	0.00152919	0.00148802	0.00140746	0.00106777	0.000790995	0.000104839	0.00105465	0.00371138	0.00243054	0.00199097	0.00168408	0.00935692	0.00947043	0.00113225	0.00417226	0.00156107	0.00122992	0.0018899	0.00445112	0.00144805	0.0019518	0.00193343	0.00316171	0.00289618	0.00191246	0.00198878	0.00174856	0.00539908	0.00259306	0.0200989	0.0167355	0.00175421	0.00130086	0.000957569	0.00129816	0.00173888	0.00104941	0.00337621	0.000236307	0.000832861	0.00102994	0.00117954	0.00161827	0.00206909	0.00436693	0.00133725	0.00139064	0.00138657	0.00131155
sucrose_1	0.00169666	0.00147947	0.00140746	0.00100953	0.000808648	0.00083439	0.000881372	0.00196491	0.00206224	0.00199097	0.00145373	0.00935692	0.00099979	0.00123057	0.00417226	0.00135395	0.00109293	0.00179006	0.00126212	0.00134817	0.0019518	0.00193401	0.00316171	0.00288024	0.00193215	0.00194844	0.00137474	0.00538433	0.00259306	0.00753944	0.00191238	0.00169505	0.00121553	0.00105547	0.00110256	0.0016557	0.00102113	0.00318826	0.000875178	0.000878463	0.0010364	0.00103361	0.00153663	0.00200989	0.00124865	0.00110772	0.00126764	0.00113992	0.00121218
sulfuric acid	0.000174273	0.000983551	0.000148568	0.000110872	0.000175376	0.000124965	0.000226112	0.00740557	3.63e-05	0.000401202	9.56e-05	7.53e-05	0.000215824	0.00014635	0.00209875	0.000127703	0.000169101	0.0001055	0.00020255	0.000122337	0.000132622	0.00188912	0.000130775	0.000178251	0.00013352	0.000437514	0.000110476	0.00299911	0.000258604	0.000143921	0.000102171	0.00110618	8.06e-05	8.04e-05	0.000113308	8.49e-05	7.17e-05	0.000692123	0.000111747	0.000214671	0.000131302	0.00581165	6.55e-05	0.00122102	0.00143911	0.000130459	0.000171254	0.000101217	0.00348586
tartaric acid	0.000204811	4.15e-05	0.000190568	0.000706486	0.000239488	0.000695469	0.000538527	0.000257026	0.000331656	0.00042529	0.000320203	0.0003866	0.00121943	0.00594836	0.000224504	0.000208145	0.000141694	3.04e-05	0.00251481	0.000600331	0.000661144	0.000304815	0.000104599	0.000488896	0.000201654	0.000994913	0.000329442	0.00083026	5.47e-05	0.000756283	0.000219229	0.000112593	0.000524077	0.000454652	0.000253305	0.000307892	0.000702921	0.000617312	0.0153978	0.000374261	0.000266937	0.000478313	0.000472998	0.000907084	0.0139532	9.52e-05	0.000809335	0.000154112	7.93e-05
taurine	0.00447402	0.0045012	0.00581068	0.00731539	0.00549126	2.06e-05	0.00933612	0.00734339	0.00592781	0.0055189	0.0037637	0.00439319	0.000130082	0.00238741	0.00296913	0.002499	0.00380111	0.00555641	0.00177841	0.00634799	0.0054602	0.00157499	0.0068976	0.00210511	0.00775979	0.000354895	8.01e-05	0.0012838	0.00841157	0.00221601	0.00601646	0.0101972	0.00482073	0.00860065	0.0081994	0.00510175	0.0077389	0.00768292	0.00930104	0.00509217	0.00036806	0.005072	0.0045201	0.00497792	9.73e-09	0.00522239	0.00224094	0.00928503	0.00639641
threonic acid	0.00475592	0.0050943	0.00675766	0.0054841	0.00198715	0.00440746	0.00161526	0.00522437	0.00129142	0.00174294	0.00537432	0.00134611	0.00108225	0.00447663	0.00147869	0.00165916	0.00571206	0.00110592	0.00144758	0.00314376	0.0052428	0.0031276	0.00144176	0.00444656	0.00527793	0.0012242	0.00553	0.00169572	0.000470431	0.00429712	0.000901597	0.00159954	0.00195843	0.000659371	0.00214625	0.000634513	0.000599868	0.000632527	0.00208999	0.00476421	0.00436988	0.00816827	0.00124476	0.0092402	0.00102337	0.00648004	0.00172691	0.00525297	0.00199915
threonine	0.000171075	0.000163392	0.000159657	5.24e-05	0.000188753	4.09e-05	0.00016897	0.000193665	0.000174893	0.000126649	0.000103685	0.000135615	0.00013327	0.00013532	0.000190692	0.000200207	8.32e-08	0.000163456	0.000157896	0.000173138	0.000147681	0.000152745	6.25e-05	3.07e-05	0.000142749	6.69e-05	0.000104303	0.000148845	0.000146937	0.000128583	0.00016384	8.31e-05	0.000149589	7.18e-05	0.000152899	0.000160093	0.000142988	0.000148253	1.62e-05	0.000175251	0.000171106	0.000142347	0.000195999	0.000173423	0.000126321	0.000152838	0.000142995	0.000191248	0.000190751
threonine_1	0.000131979	0.000439118	0.000504444	0.000542833	0.000374746	0.000526338	0.000289542	0.000342851	0.000510104	0.000604395	0.00065542	0.000563368	0.000446062	0.000492797	0.000372009	0.000384303	0.000610727	0.000436749	0.000771968	0.000457802	0.000414412	0.000567575	0.000581588	0.000655378	0.000495346	0.000704083	0.000593947	0.000579911	0.000531064	0.000450501	1.08e-05	0.000551837	0.000550534	0.000466748	0.000592761	0.000456998	0.000551138	0.000442218	0.000110768	0.000616146	0.000647053	0.000671732	0.000895735	0.000634679	0.000718796	0.000831237	0.000738834	0.000602867	0.000408168
threonine minor	0.000396307	0.000104708	6.68e-05	0.000296664	0.000712857	0.000159967	0.000231761	0.000512037	5.29e-05	0.000182409	0.000114646	0.000251774	0.00015159	0.000417425	0.000436691	0.000524144	0.000342784	0.000314123	0.000499131	0.000299032	0.000231053	8.48e-05	0.000341998	0.000139471	0.000145042	8.59e-05	0.000125451	5.08e-05	4.09e-05	0.000151302	0.000132534	5.65e-05	0.000158345	3.95e-05	0.000229481	0.000270731	0.000119356	8.07e-05	0.00133048	7.77e-05	0.000529322	8.01e-05	0.000100417	6.51e-05	0.000169842	0.000119224	0.000305173	0.00051814	0.000429683
thymidine-5-phosphate	0.00133437	0.00138006	0.001358	0.00312389	0.00283628	0.00223386	0.000794302	0.000539449	0.000747494	0.00096136	0.000760113	0.000714909	3.79e-06	0.00053517	0.00210428	0.00194522	0.00240206	0.00108079	0.00169567	0.00156478	0.00117834	0.0010901	0.00110085	0.00121199	0.00127844	0.00117026	0.00102167	0.000790756	0.000879057	0.00117908	0.00127116	0.00140394	0.00102335	0.00111946	0.00116705	0.000844042	0.00078549	0.000748441	0.00577342	0.00436686	0.00716028	0.000594526	0.000494781	0.000547872	0.000504846	0.000845265	0.000869559	0.00198723	0.00239847
thymine	0.000171779	0.000156905	0.000182694	0.000146122	7.12e-05	0.000151235	0.000105511	0.00016847	0.000157232	0.000226025	0.000242714	0.000302674	0.000288927	0.000189538	0.000119983	9.21e-05	8.94e-05	0.000269786	0.000250604	0.000259769	0.000251934	0.000430689	0.000232973	0.000244188	0.000120563	0.000161879	0.000368101	0.000219664	0.000171431	0.000327344	0.000231158	0.000113586	0.000241513	0.00017247	0.000198372	0.00026699	0.000187688	0.000146537	0.000100143	0.000222051	0.000162385	0.000178571	4.99e-05	0.000208956	0.000245563	0.000174859	0.000227417	0.000121959	0.000140417
tocopherol alpha-	0.000125253	0.000123129	0.000142293	0.000178346	3.69e-08	2.53e-05	0.000105951	1.62e-05	0.000132345	0.000169915	3.64e-05	9.49e-06	4.95e-05	0.000139312	1.18e-05	1.12e-05	1.65e-05	0.000128619	0.000143007	2.36e-05	2.83e-05	0.000106637	0.000173889	3.16e-05	0.000128705	0.000118972	2.41e-05	0.000108632	9.59e-05	4.57e-06	2.38e-05	0.000128575	2.05e-05	0.000138924	0.000168053	3.69e-08	0.000130539	0.000111419	0.000119868	0.000105085	2.8e-05	0.00014787	0.000130639	0.000145804	0.000174472	0.000156623	2.69e-05	0.000167728	1.59e-05
tranexamic acid NIST	2.98e-05	5.65e-05	5.47e-05	3.52e-05	2.55e-05	2.91e-05	6.34e-05	3.34e-05	4.4e-05	4.64e-05	3.35e-05	4.15e-05	4.44e-05	2.66e-05	9.52e-05	1.81e-05	0.000298782	3.28e-05	1.52e-05	2.21e-05	3.2e-05	3.88e-05	6.74e-05	3.46e-05	4.26e-05	4.84e-05	6.39e-05	2.39e-05	3.41e-05	4.03e-05	3.06e-05	3.67e-05	2.87e-05	4.46e-05	3.23e-05	3.1e-05	3.14e-05	3.51e-05	8.24e-05	4.93e-05	4.26e-05	0.00121036	0.000458652	0.000767991	0.00109594	5.2e-05	3.41e-05	3.22e-05	2.46e-05
trans-4-hydroxyproline	0.00370151	0.00210281	0.00377291	0.00224774	0.00232852	0.00166081	0.00536294	0.007962	0.00586484	0.00287232	0.00209284	0.00298006	0.00213389	0.00206689	0.0029063	0.0027313	0.00325929	0.00227555	0.00490943	0.00267364	0.00163658	0.00305251	0.00271594	0.00163757	0.00232049	0.00208978	0.00273019	0.00496433	0.00368421	0.00226566	0.00221301	0.00335611	0.00245385	0.00299702	0.00266904	0.00234726	0.00248255	0.00321263	0.00495106	0.006101	0.00402802	0.00416619	0.00585227	0.00524307	0.00606454	0.00497035	0.00361158	0.00380299	0.00285176
trehalose	9.14e-07	9.14e-07	9.14e-07	9.14e-07	9.14e-07	9.14e-07	9.14e-07	4.53e-05	9.14e-07	9.14e-07	2.67e-05	9.14e-07	9.14e-06	9.14e-07	9.14e-07	9.14e-07	9.14e-07	9.14e-07	9.14e-07	9.14e-07	9.14e-07	9.14e-07	9.14e-07	9.14e-07	9.14e-07	9.14e-07	2.88e-05	9.14e-07	9.14e-07	9.14e-07	9.14e-07	9.14e-07	9.14e-07	9.14e-07	9.14e-07	1.83e-05	9.14e-07	9.14e-07	4.54e-05	9.14e-07	1.9e-05	9.14e-07	9.14e-07	9.14e-07	7.16e-05	9.14e-07	2.35e-05	9.14e-07	9.14e-07
trisaccharide	0.000102067	0.000151511	0.000112582	0.00069566	0.000186891	0.000511491	0.00108729	0.0010408	0.00111043	0.000333007	0.000232679	0.000103537	0.000115471	0.000102942	0.000379641	0.000350261	0.000136937	0.000157161	4.53e-05	0.000150606	5.25e-05	9.13e-05	0.00134051	6.1e-05	0.00102944	0.000168884	7.7e-05	0.00013628	7.62e-05	6.54e-05	7.61e-05	0.00077453	8.44e-05	9.4e-05	0.000107968	0.000101127	8.41e-05	0.00028775	1.97e-05	5.38e-05	0.000540478	7.37e-05	2.6e-05	7.76e-05	0.000158868	0.000853144	7.19e-05	4.65e-05	4.84e-05
tryptophan 3TMS	0.00509625	0.00562442	0.00596993	0.00558744	0.0131086	0.00368062	0.00781477	0.00944097	0.00839468	0.00344597	0.00298941	0.00481181	0.0047079	0.00352156	0.0100392	0.0130051	0.00843583	0.00641732	0.00455079	0.0059265	0.00510163	0.00410371	0.00688307	0.00499977	0.00620447	0.00337254	0.00228362	0.00505457	0.00392525	0.00345036	0.0052528	0.00553368	0.00780652	0.00861555	0.00835236	0.00970176	0.00934971	0.00850486	0.00862839	0.0049603	0.0034991	0.00604254	0.0062191	0.00703474	2.74e-08	0.00384612	0.00344688	0.0102236	0.00667361
tyrosine	0.0192719	0.0232989	0.0181037	0.021514	0.0261726	0.0184988	0.0240886	0.0211449	0.0221581	0.0198252	0.0143782	0.0194528	0.01861	0.0201818	0.0231789	0.0264406	0.0244145	0.0238393	0.018969	0.0214294	0.0180876	0.0197824	0.0239269	0.017754	0.0190082	0.0203693	0.0106615	0.0159655	0.01496	0.0139009	0.0179343	0.0176191	0.0133152	0.0162028	0.0156656	0.0161571	0.0157459	0.0140244	0.00134324	0.0151022	0.0140796	0.0188141	0.0201281	0.021566	9.98e-05	0.020669	0.0198492	0.025074	0.0228146
tyrosine minor	0.000511063	0.00106109	0.000656456	0.000753469	0.000648597	0.00068462	0.000646291	4.2e-05	0.000643673	0.000430466	0.000408324	0.000517964	0.000410271	0.000504109	0.000766315	0.000834721	0.000910799	0.000678182	0.000323077	0.000644335	0.000546765	0.000531632	0.000933771	0.000559044	0.000647803	0.000430602	0.000159715	0.000347073	0.000301687	0.000310593	0.000518252	0.000527031	0.00048439	0.000356637	0.000413124	0.000145247	0.000352495	0.000491177	0.000255689	0.000391847	0.000575624	0.000489236	0.000589106	0.000641038	0.000921825	0.000445996	7.1e-06	0.000864289	0.000731801
UDP GlcNAc	0.00144747	0.00126996	0.00193504	0.00288015	0.00231113	0.00231987	0.00230993	0.00260043	0.0023115	0.00218294	0.00153144	0.00199897	0.00126977	0.0161257	0.00167005	0.0016867	0.0112419	0.00162759	0.00254736	0.000461885	0.00126613	0.00187309	0.00179945	0.000432988	0.00368654	0.00147408	0.00172193	0.000420349	0.00139137	0.000419961	0.00138999	0.00287367	0.00177193	0.00206199	0.00197789	0.00155645	0.00169163	0.00145336	0.0111757	0.00128769	0.000983447	0.00215748	0.000658976	0.00229058	0.00167041	0.00210171	0.000490475	0.0016026	0.00127029
UDP-glucuronic acid	5.14e-05	4.03e-05	0.000364275	0.000145108	3.71e-05	0.000123431	0.000308135	0.000227623	0.000340181	0.00018919	7.06e-05	0.000135103	1.53e-05	1.05e-05	0.000115013	0.000113813	0.000124165	0.000118166	7.08e-05	5.6e-05	9.11e-05	6.17e-05	0.000136981	0.00011531	0.00014866	3.38e-05	2.62e-05	0.000165141	0.000335563	0.00011662	0.000102517	0.000185655	0.00015424	9.23e-05	0.000152202	9.79e-05	7.81e-05	0.000607976	0.000151455	8.52e-05	0.000110165	3.54e-05	0.000194774	0.000227929	0.000333467	4.08e-05	0.00012301	0.000192299	9.55e-05
UDP-N-acetylglucosamine	0.00155998	0.00171526	0.00157377	0.00520117	0.0037869	0.00395784	0.00346233	0.00414862	0.00345324	0.00267936	0.00159601	0.00218398	0.00134686	0.00140047	0.00173204	0.00167402	0.0017287	0.00139214	0.00242191	0.00185649	0.00104495	0.00214572	0.00144818	0.0010294	0.00127258	0.00129686	0.000982569	0.00125902	0.0012392	0.000954817	0.0010671	0.00198011	0.00265549	0.00322019	0.00340582	0.00223336	0.00231662	0.00226672	0.00309501	0.00164378	0.00128939	0.00233605	0.00252176	0.00239407	0.000678499	0.00206747	0.0016479	0.00166291	0.00161284
uracil	4.65e-05	2.67e-07	5.09e-05	8.21e-05	0.000172646	0.0124496	0.000143428	0.000149224	5.69e-05	0.014833	3.02e-05	3.77e-05	0.0127226	1.73e-05	9.03e-05	0.000135235	0.000113424	2.21e-07	5.44e-05	1.55e-07	4.66e-05	2.82e-05	4.07e-07	5.1e-05	6.76e-07	2.97e-07	4.03e-05	0.000140131	3.69e-05	3.59e-07	1.06e-06	9.3e-05	2.12e-07	4.11e-05	2.17e-07	2.72e-05	2.77e-07	5.79e-06	0.000183775	7e-05	6.1e-05	3.73e-05	0.0206426	2.94e-07	1.55e-08	2.67e-07	3.41e-05	0.000100193	8.74e-05
uracil_1	2.27e-05	0.000115447	1.55e-06	0.00030944	0.000151472	2.3e-06	0.000157936	9.37e-06	0.000208098	0.000261081	0.000181752	1.7e-05	1.71e-05	2.49e-05	4.62e-06	0.000117726	0.000186726	0.000236403	1.84e-05	1.61e-06	8.46e-06	9.05e-07	0.000155612	9.06e-06	0.000189806	3.05e-06	2.67e-06	2.6e-06	4.07e-06	0.000131586	0.00017524	1.65e-06	1.64e-06	8.98e-06	7.26e-06	1.87e-05	8.81e-06	1.66e-06	0.000140311	4.47e-06	0.000225294	1.82e-05	5.72e-06	8.85e-06	8.86e-05	3.69e-06	1.48e-06	0.00018943	0.000214994
urea	0.000123392	0.00194299	0.00114943	5.53e-05	1.31e-05	3.21e-06	0.000105668	8.1e-05	1.4e-05	4.87e-05	4.34e-05	2.82e-06	0.000108471	0.00281135	5.71e-05	5.72e-05	6.91e-05	0.00376808	0.00187317	3.27e-06	3.31e-06	0.00350685	0.00389171	6.72e-05	7.86e-05	6.93e-05	0.00097817	0.00011119	0.00477401	0.00125248	5.96e-05	0.000116931	0.0032173	8.73e-05	0.000104876	0.000107895	0.000116537	0.000387629	0.000103122	0.00368605	7.41e-05	7.81e-05	0.000621815	0.00010284	8.43e-05	4.41e-05	0.00282719	5.22e-05	5.43e-05
urea_1	0.00667133	0.000195999	0.00370045	0.000190129	0.00027809	0.000152156	0.000299184	0.00350495	0.000224041	0.00377944	0.00429887	0.000171886	0.0127142	0.00691425	0.00164774	0.00339578	0.000191397	0.000202899	0.00478753	5.63e-05	0.000240341	0.010092	0.00993386	0.00969902	0.00976708	0.00395618	0.000166684	0.00299911	0.00311303	0.00397399	0.000160762	0.000424116	0.0102118	7.24e-05	0.000288789	0.013414	0.0125494	0.0104383	0.00341187	0.00308882	0.000188601	0.00200343	0.000177492	0.000292656	0.00609489	4.57e-05	0.000299991	0.000171119	0.0093087
urea_2	0.00267242	0.00383541	0.001765	0.00330662	1.05e-05	2.74e-06	0.00350387	1e-05	0.00386933	0.00328725	0.00258275	0.00317094	0.00420968	0.00281135	5.71e-05	0.00222672	3.94e-06	7.91e-05	0.000856696	0.00357524	0.00348277	0.00350685	3.65e-06	6.72e-05	3.78e-06	0.00376977	0.0022835	0.00011119	0.000166627	0.00288951	0.00308044	0.00368821	0.0032173	0.00414983	0.00412992	0.00385311	0.00380438	0.00345516	0.000103122	9.16e-05	7.41e-05	0.00435793	9.52e-05	0.00442242	8.43e-05	0.000451036	4.36e-05	0.00329045	3.18e-06
urea_3	0.00530949	0.0104804	0.0125097	0.0101125	0.00027809	0.00847093	0.0108044	0.00661977	0.000224041	0.000217916	0.000134768	0.00973934	0.0127142	0.0110492	0.00853964	0.000197058	0.00913924	0.0111897	0.00477668	0.00968409	0.0099088	0.010092	0.000177285	0.00969902	0.00976708	0.000166696	0.00610988	0.00943353	0.0090148	0.00782778	0.00881065	0.000242367	0.0102118	0.0108955	0.0119184	0.013414	0.0125494	0.0104383	0.00662364	0.000217678	0.000188601	0.0105769	0.000902494	0.00990665	0.0095967	0.00852918	0.0075106	0.00894704	0.0093087
urea_4	2.66e-05	2.15e-05	0.003643	1.97e-05	3.65e-05	2.36e-05	2.49e-05	0.0013895	3.21e-05	2.45e-05	2.8e-05	0.00317094	3.25e-05	2.59e-05	0.00293997	3.3e-05	0.0036042	0.00376808	5.33e-05	0.00357524	7.47e-06	0.00350685	4.64e-05	2.74e-05	0.00377691	0.00376977	2.53e-05	1.54e-05	2.73e-05	1.6e-05	2.41e-05	1.59e-05	1.89e-05	3.39e-05	0.00412992	3.33e-05	3.17e-05	2.02e-05	0.00265008	1.76e-05	2.97e-05	1.11e-05	0.00345141	0.00282783	1.39e-05	0.0030314	2.18e-05	1.15e-05	0.0032987
urea 3TMS	0.000934155	0.000307694	0.000296925	0.000231839	0.000274221	0.000111246	0.000158371	0.00040306	0.000836885	0.000210819	0.00021323	0.000216837	0.000181556	0.000395477	0.000156336	0.00470879	0.00528745	0.00027466	0.000328155	0.000249752	0.000439497	5.72e-05	0.000335608	0.000333326	0.000143841	0.000700328	0.000333083	0.00188304	0.00122888	0.000417948	0.000356497	0.00220083	0.000101379	0.00027842	0.000121799	0.000161251	0.000286809	0.00124468	0.00102624	0.000410249	0.000131197	0.000173478	0.00148499	0.00145503	2.51e-05	0.000144193	0.000142918	0.000128629	0.000233163
uric acid	0.00662228	0.00639957	0.000767162	0.000846611	0.000857639	0.000772109	0.000634722	0.000742866	0.0010807	0.00582041	0.00600297	0.00615986	0.000987179	0.00349638	0.005847	0.000168951	0.00604632	0.00606035	0.00705714	0.00697957	0.00570669	0.000565436	0.0067164	0.00108125	0.00625194	0.0066314	0.0056781	0.000729914	0.000587602	0.00627846	0.000792572	0.00626001	0.000566544	0.00510814	0.00593314	0.000414899	0.000879178	0.00494273	0.000383231	0.000654361	0.000804024	3e-05	0.000579841	0.000474646	3.74e-05	0.00508918	0.00595918	0.00624979	0.00570459
uric acid_1	0.0223457	0.0197115	0.0205792	0.0197826	0.0165041	0.0206866	0.0185407	0.0155426	0.0176148	0.0190293	0.0225879	0.0196049	0.023949	0.0264842	0.0157264	0.00056459	0.0162007	0.0186626	0.0288501	0.0234049	0.0205023	0.0187812	0.0206484	0.020938	0.0214457	0.0229468	0.0245271	0.0229164	0.0233276	0.0227682	0.0181289	0.0212702	0.0208428	0.0173814	0.0204745	0.0229406	0.020742	0.0197198	0.0134716	0.0209798	0.0237974	0.0190313	0.0194372	0.00175919	0.0163756	0.0170829	0.0221628	0.0161372	0.0152069
uridine	0.00229562	0.00148824	0.00134611	0.000299122	0.00554959	0.00125416	0.0013571	0.000449016	0.000909904	0.00142893	0.00102566	0.000684832	0.000199586	0.000437242	0.00161146	0.000389943	0.000932308	8.28e-05	0.0025154	0.00146306	0.00184171	0.000272891	5.24e-05	0.000322428	0.000246503	0.000257009	0.00119112	0.00212715	0.000342589	0.00086808	0.000266765	0.000379825	0.000296636	0.000446519	4.64e-05	0.000230213	0.00103194	0.00018702	0.00164524	0.00192788	0.00102578	0.000379898	0.00129966	0.000394534	0.000658602	0.000213448	0.00031085	0.000622839	0.00162894
uridine minor	0.00214322	0.00154068	0.00127075	0.00180496	0.00554959	0.00118496	0.00283474	0.00331323	0.00143753	0.00180176	0.00102566	0.00154286	0.00078185	0.00101093	0.00161146	0.00235149	0.00192786	0.00116205	0.00130411	0.00146306	0.00201099	0.00058026	0.00101915	0.0010554	0.00186994	0.00150923	0.000630512	0.00192092	0.000186534	0.00086808	0.00140552	0.00175936	0.000591092	0.00143069	0.000511663	0.000550465	0.00103194	0.000464467	0.00329808	0.00194231	0.00104309	0.0011345	0.00111526	0.00114351	0.0059447	0.00124714	0.000781537	0.00163956	0.00223704
uridine-5'-monophosphate	0.000326976	0.000536476	0.00038986	0.00113406	0.000788671	0.000593472	0.00101429	0.00150304	0.000210217	0.000283424	0.000865573	0.00015679	0.00068023	0.000106792	0.000249617	0.000165562	0.000403475	0.00077457	0.00018352	0.00069362	0.000761982	0.000609334	0.000214601	0.000242428	2e-05	0.000941386	0.00104995	0.000137596	0.000482599	0.000938939	2.39e-05	0.000763525	0.000164054	0.000732862	0.000650201	0.000126969	0.000119921	0.00039406	0.000197338	8.95e-05	9.29e-05	0.000551978	0.000128134	0.000707572	0.00125817	0.000164443	0.000536773	0.000484916	0.000438506
uridine-5-monophosphate	0.000113645	3.65e-05	8.21e-05	0.000294402	3.65e-08	3.65e-08	2.19e-05	8.03e-05	9.21e-05	0.000494146	3.65e-08	6.94e-05	3.65e-08	0.000238584	3.65e-08	3.65e-08	3.65e-08	0.000179609	0.000145197	3.65e-08	3.65e-08	6.43e-05	8.26e-05	2.42e-05	3.96e-05	4.24e-05	2.04e-05	6.26e-05	6.62e-05	3.65e-08	2.42e-05	3.88e-05	6.41e-05	0.000142523	0.000189735	3.65e-08	9.73e-05	4.6e-05	0.000859763	0.00011125	3.65e-08	8.32e-05	4.8e-05	1.43e-06	9.91e-05	8.97e-05	3.65e-08	3.58e-05	3.65e-08
valine	0.01162	0.0199151	0.0182399	0.017989	0.028987	0.0188884	0.0243745	0.0203935	0.0229184	0.0138328	0.0111528	0.0108665	0.019323	0.0146097	0.0265415	0.0315249	0.030025	0.0247322	0.0106834	0.0217813	0.0194746	0.012864	0.0245479	0.014587	0.0213201	0.0221489	0.00975819	0.025347	0.0230989	0.0119311	0.0226366	0.0280226	0.0181959	0.0227574	0.0183632	0.0177791	0.0211641	0.0196761	0.018856	0.0277885	0.0177732	0.0196855	0.0198158	0.0237967	0.0195639	0.0196502	0.0176853	0.0266549	0.0246609
xylonolactone NIST	3.47e-06	1.53e-05	9.48e-06	8.12e-06	1.25e-05	1.06e-05	2.6e-05	2.87e-05	1.27e-05	1.74e-05	1.8e-05	8.74e-06	1.89e-05	8.27e-06	1.28e-05	1.26e-05	1.59e-05	5.25e-06	4.92e-05	7.8e-06	1e-05	7.35e-06	6.08e-06	2.83e-05	1.15e-05	9.88e-06	1.39e-05	1.82e-05	1.89e-05	5.14e-05	5.17e-06	1.14e-05	1.87e-05	1.17e-05	1.3e-05	1.72e-05	7.6e-06	4.54e-05	6.27e-05	3.56e-06	1.22e-05	1.55e-05	1.08e-05	2.01e-05	2.5e-05	1.61e-05	1.68e-05	6.13e-06	1.32e-05
xylulose NIST	0.0013093	0.00189926	0.00237356	0.00264151	0.00355737	0.00186264	0.00251409	0.00178244	0.00112573	0.00252495	0.00242447	0.00131424	0.00182422	0.00113099	0.00262813	0.00284406	0.00252062	0.00161458	0.000838148	0.00251404	0.000628866	0.000311556	0.00223521	0.00176324	0.00255315	0.00193158	0.00193933	0.00206772	0.00153522	0.00158763	0.00237382	0.00145398	0.00236087	0.00223982	0.0016944	0.00279466	0.00312306	0.00176348	0.0030602	0.00154055	0.00155149	0.00255979	0.000899142	0.00199349	0.000449247	0.00261296	0.00297317	0.00296018	0.00284136
xylulose NIST_1	0.000289889	9.36e-05	9.89e-05	0.000127146	1.48e-05	9.28e-05	0.000226418	9.26e-05	4.8e-05	8.59e-05	7.4e-05	6.32e-05	5.83e-05	0.000234207	0.000141118	0.000156559	0.000143024	6.91e-05	5.72e-05	0.000315569	7.5e-05	7.05e-05	0.000240897	5.37e-05	0.000191299	6.81e-05	7.84e-05	0.000132902	6.87e-05	8.42e-05	0.000171451	0.000160729	0.000100673	9.99e-05	0.000256693	0.000268114	0.000242821	0.000105096	0.000304526	7.82e-05	0.000118227	9.03e-05	4.56e-05	9.79e-05	7.73e-05	9.65e-05	0.000297868	0.000182726	0.000170934
z artifact	0.000134303	0.000102831	0.000106733	0.00030944	0.000151472	0.000120489	0.000157936	0.000204474	0.000208098	0.000226314	0.000181752	0.000157171	0.000192243	0.000152176	0.000140538	0.000117726	0.000186726	0.000236403	0.000167629	0.000137957	0.000195708	0.000129816	0.000155612	0.000124692	0.000189806	0.000196473	0.000180572	0.000160696	9.95e-05	0.000131586	0.00017524	0.00015917	0.000107058	0.000232661	0.00011671	0.000181674	0.000205218	8.65e-05	0.000140311	0.000222121	0.000225294	0.000173861	0.000198617	0.000118075	0.000102635	0.00027796	2.65e-06	0.00018943	0.000214994
z hexose perTMS	0.000152151	0.00011983	8.69e-05	0.000134215	0.00025903	0.000124303	0.000185405	0.000109932	0.000134967	0.000118256	0.00101518	0.00135359	5.9e-05	7.39e-05	0.000216702	0.000359968	0.000118717	0.000247046	9.41e-05	0.000113822	8.21e-05	0.000288941	0.000263511	0.000164363	0.000156525	0.000181186	0.000242764	0.000125984	0.000122063	0.000458253	0.000182849	0.000213506	0.00361761	0.00373703	0.00423147	0.00220524	7.01e-05	0.00206228	4.56e-05	5.97e-05	0.000176737	5.5e-05	0.000230009	6.87e-05	0.00030005	0.00011408	0.000100996	0.000278943	0.000191647
z hexose pertms_1	0.000495081	0.00118227	3.42e-05	0.00646798	0.00640002	0.00666464	0.00149758	0.00175555	0.00142138	0.00476239	0.000298746	0.00500055	0.00149459	0.00014119	0.00326021	0.000548281	0.0018846	0.00400041	0.0030752	0.000373654	0.00279144	0.00279157	0.00111371	0.000299078	0.000406691	0.00113335	0.00265703	0.000185455	0.00186623	0.0010641	0.000169834	0.00298559	0.00234843	0.00236096	0.00637943	0.00222714	0.00161475	0.00165035	0.00280274	0.00208601	0.00173625	0.00440232	0.0047309	6.66e-05	0.00184733	0.00165106	0.00351972	0.00044259	0.00402536
zymosterol major	1.31e-05	1.22e-05	9.53e-06	1.38e-05	2e-05	8.88e-06	2.76e-05	2.71e-05	1.13e-05	4.7e-06	1.9e-05	2.21e-05	7.3e-05	7.08e-05	1.87e-05	2.45e-05	4.53e-05	5.1e-05	1.3e-05	2.97e-05	1.72e-05	1.1e-05	1.09e-05	6.66e-05	1.33e-05	7.98e-06	7.77e-06	1.28e-05	3.61e-05	5.8e-05	1.23e-05	1.49e-05	9.98e-06	1.74e-05	3.02e-05	1.48e-05	7.68e-06	1.35e-05	1.07e-05	1.82e-05	3.16e-05	5.4e-05	7.78e-06	4.65e-05	0.000118873	6.77e-06	1.31e-05	1.64e-05	4.11e-05
[truncated: 1 more columns]
