# Supplementary figures and images for: A Potential Citrate Shunt in Erythrocytes of PKAN Patients Caused by Mutations in Pantothenate Kinase 2
Source: MDPI journal article supplement (doi:10.3390/biom12020325), 2022-02-18

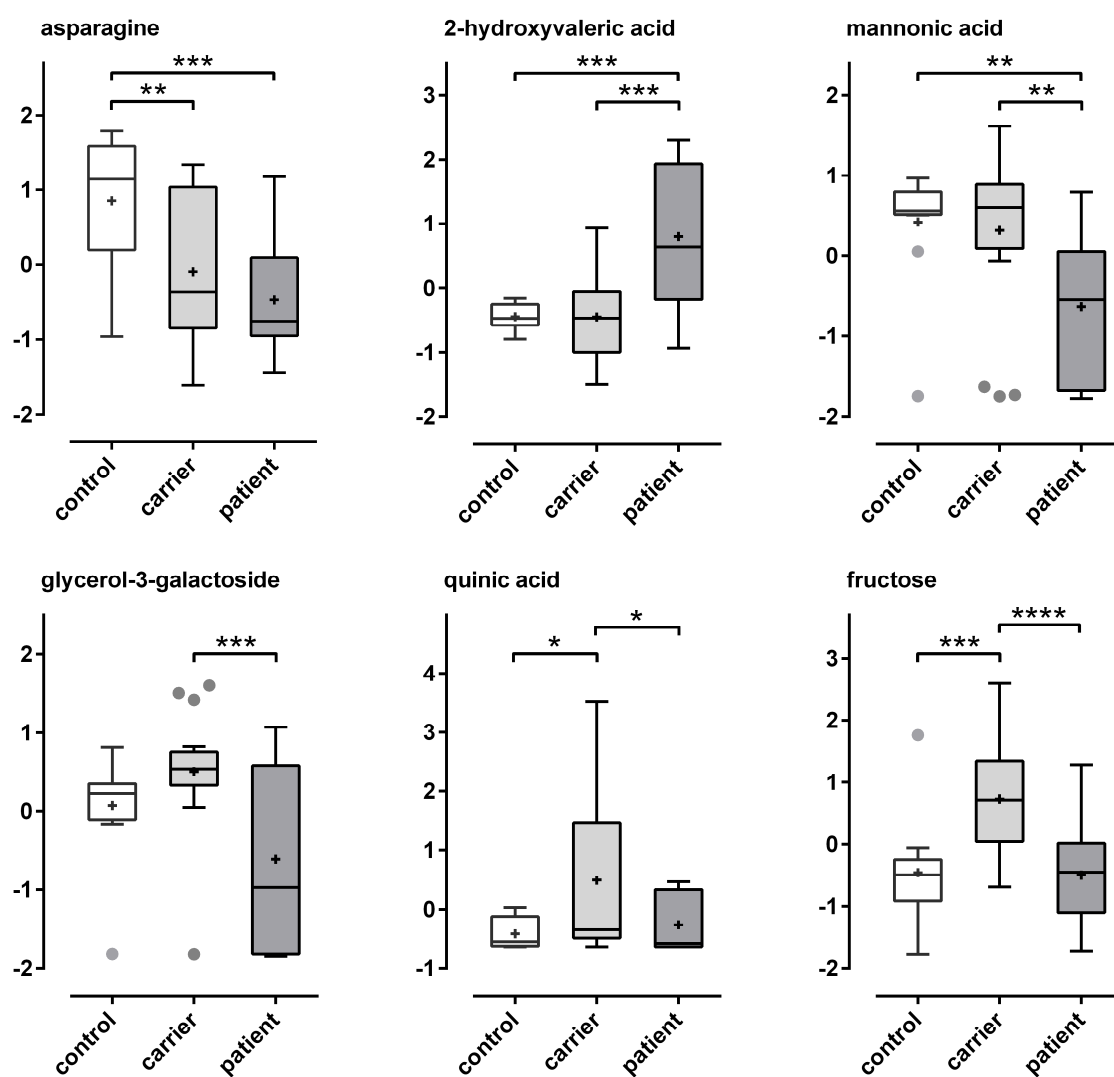

Figure S1. Boxplots of further metabolites altered PKAN erythrocyte.

Supplement: s1 [file s1]
